# Supplementary material for: Community analysis of pigment patterns from 37 microalgae strains reveals new carotenoids and porphyrins characteristic of distinct strains and taxonomic groups
Source: PubMed Central journal article supplement (PMC5322898; doi:10.1371/journal.pone.0171872), 2017-02-23

# Supporting Information

## S4 Figs. Spectra of unidentified pigments.

**P1**

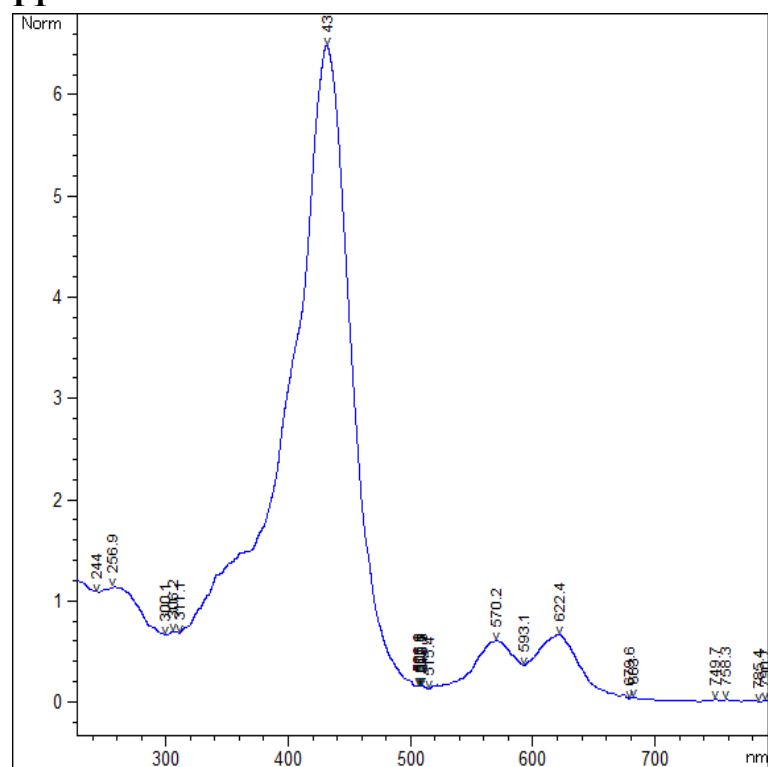

**P2**

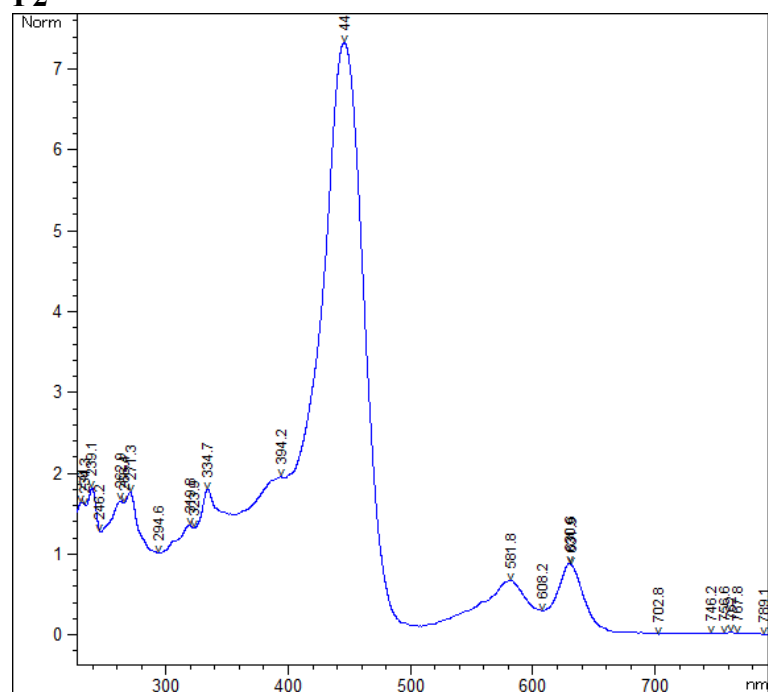

### P3

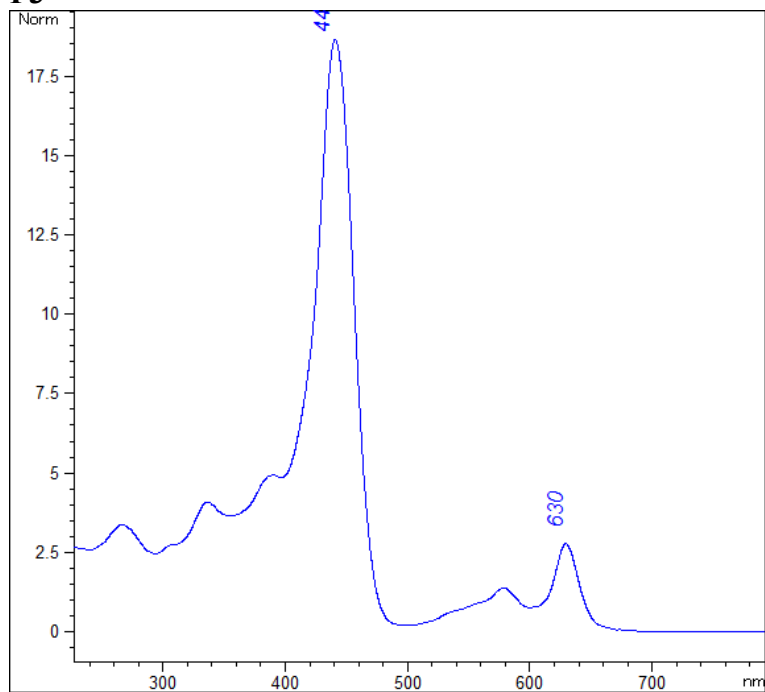

### P4

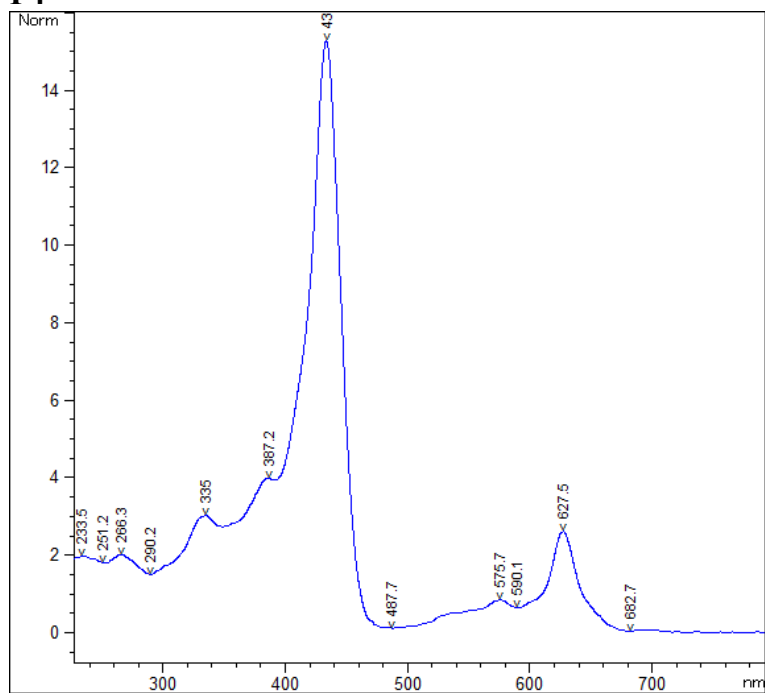

### P5

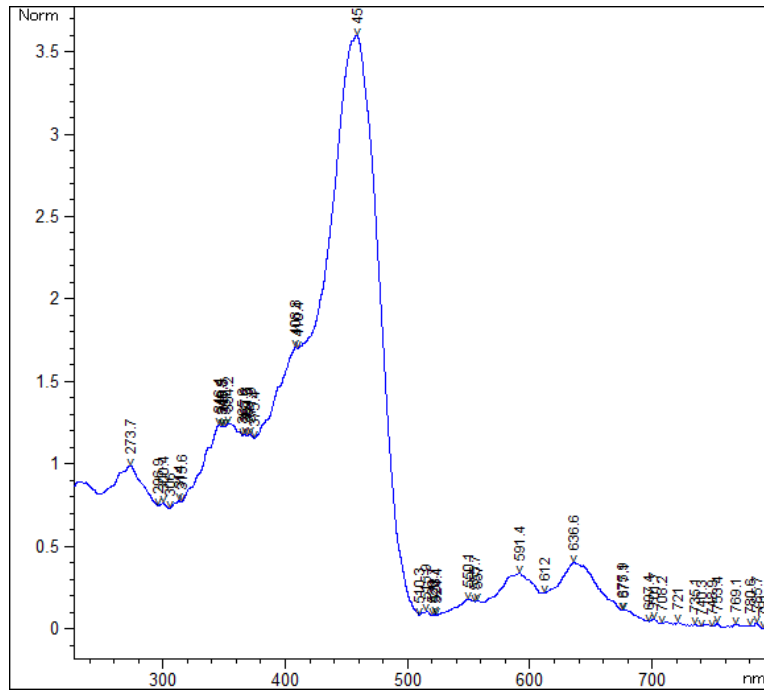

### P6

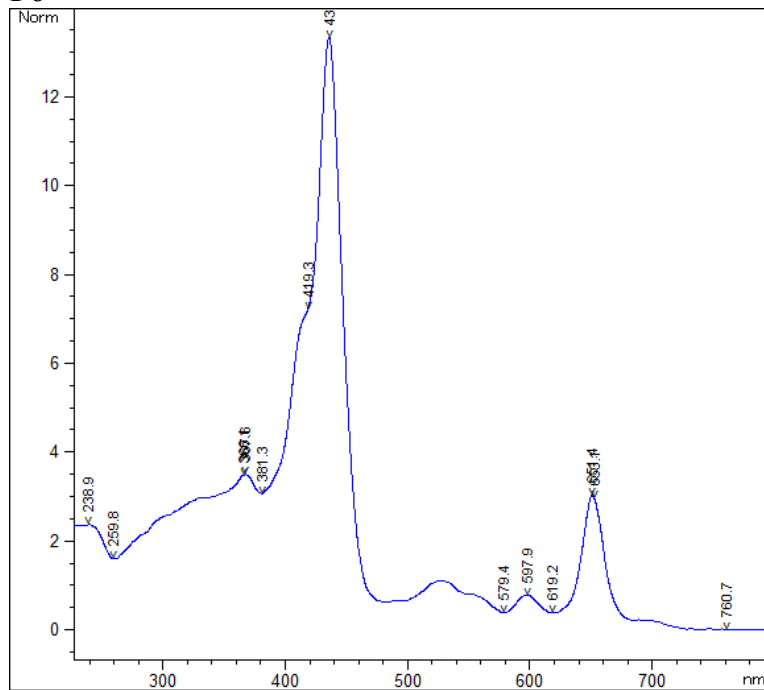

**P7**

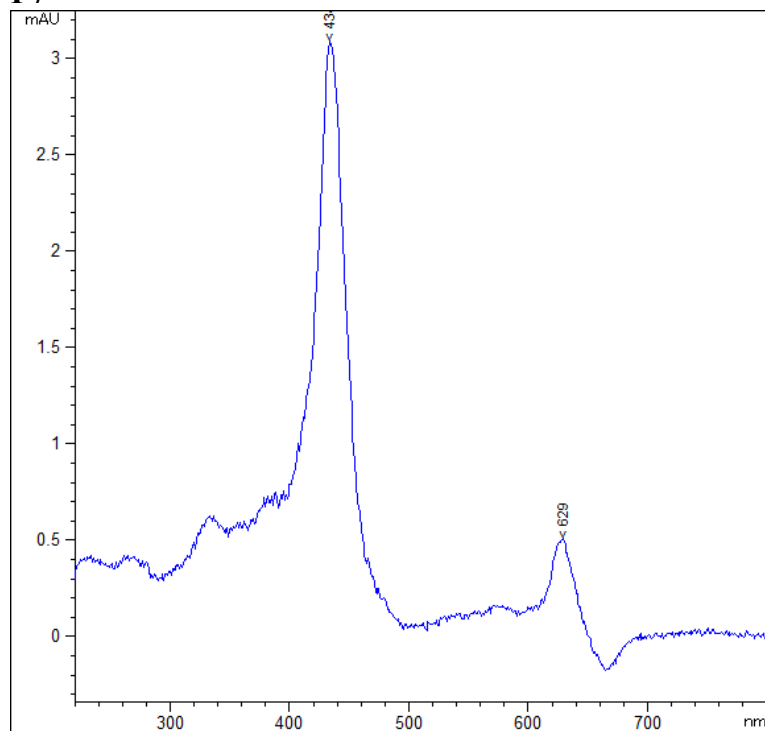

**P8**

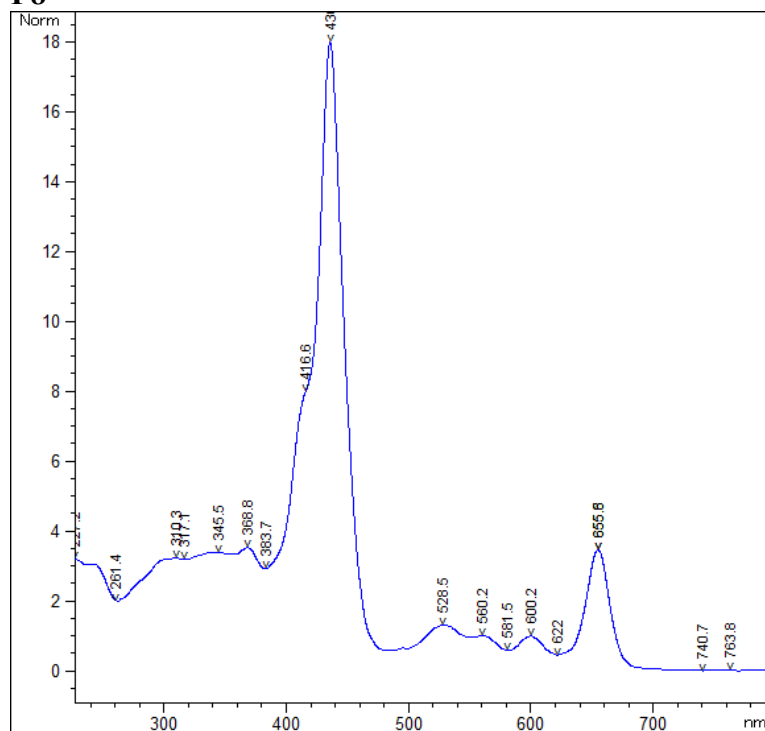

**P9**

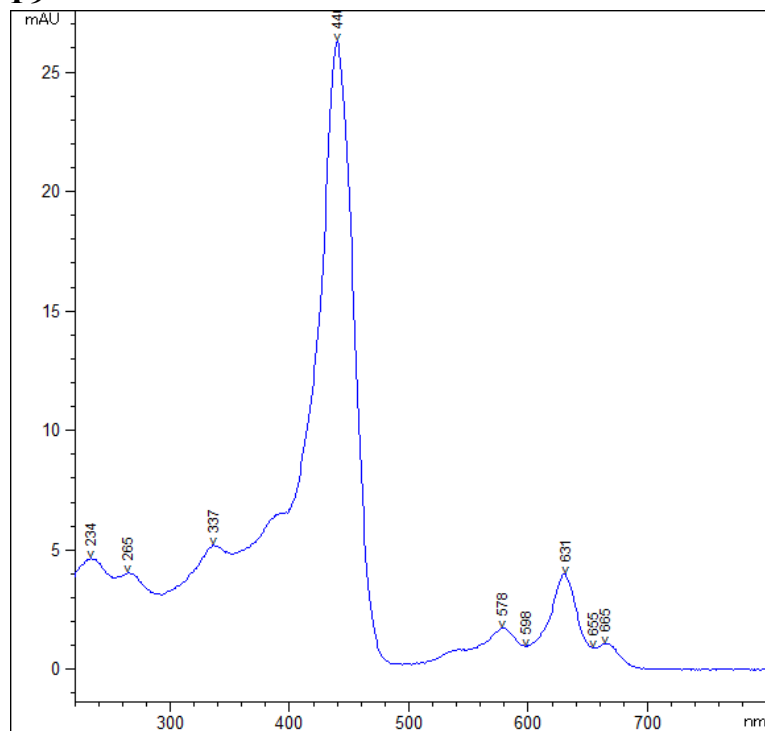

**P10**

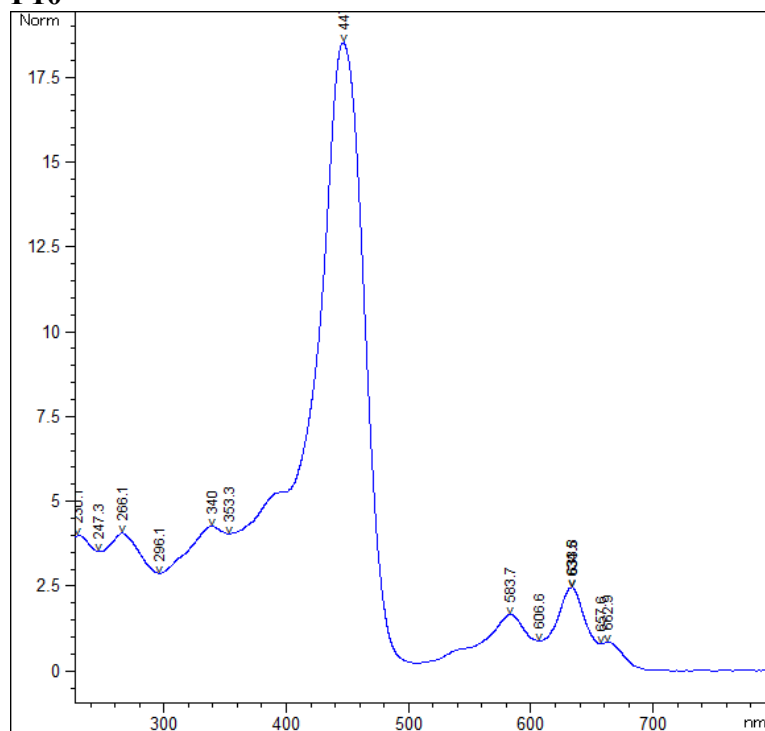

### P11

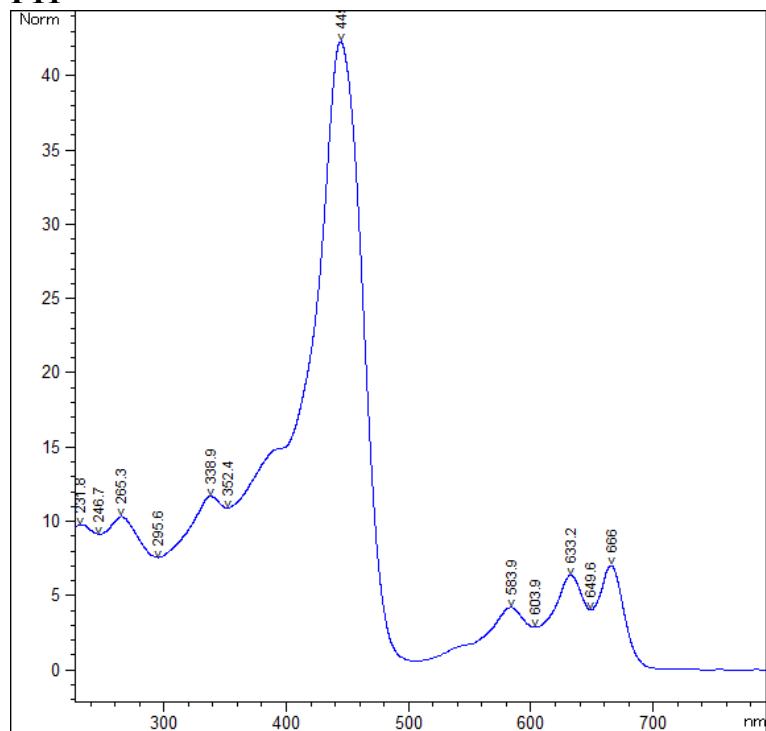

### P12

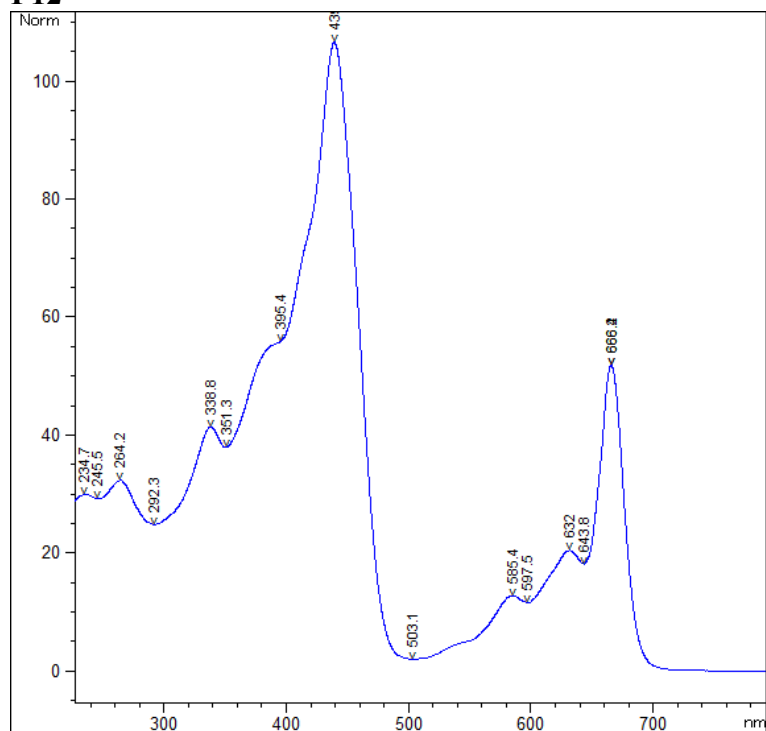

### P13

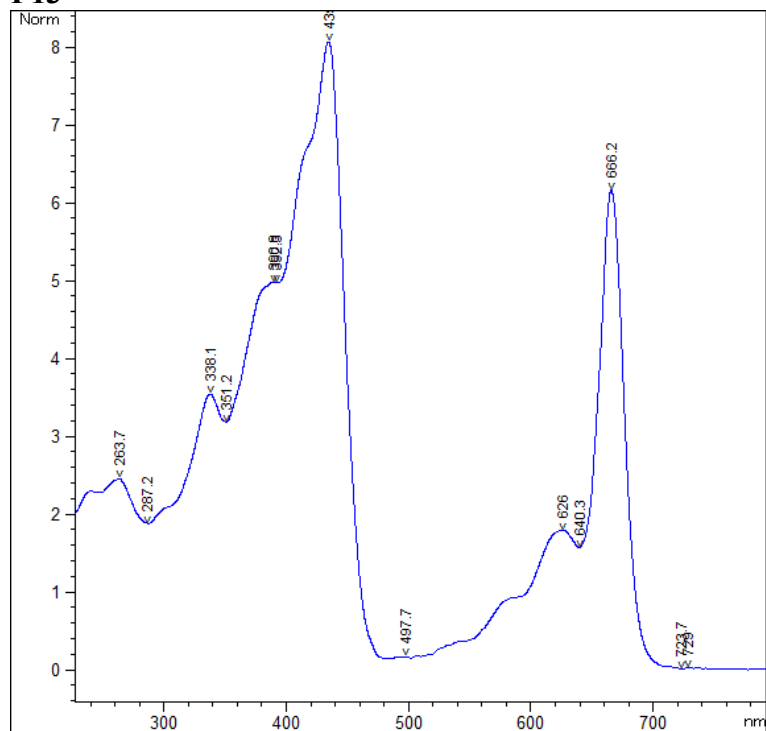

### P14

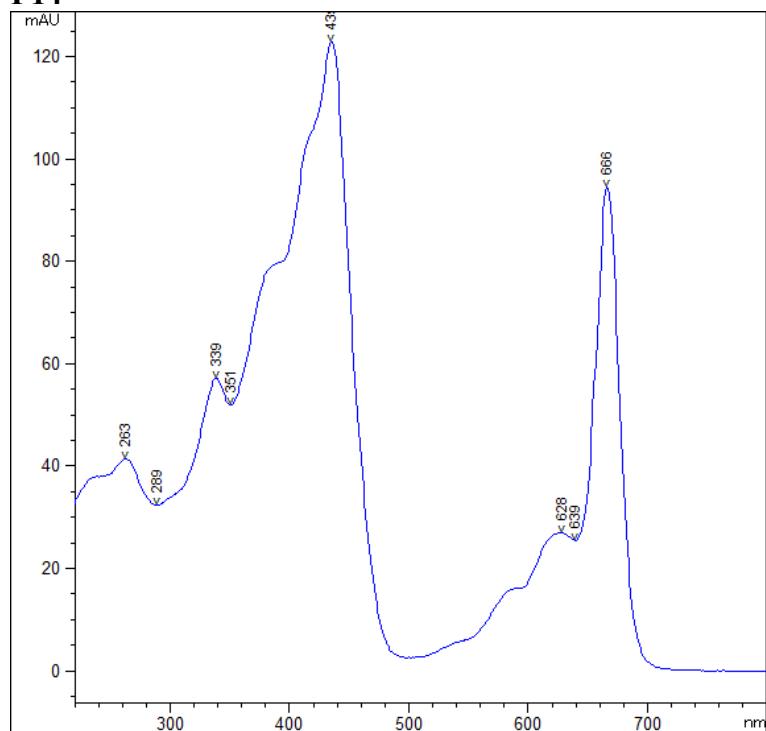

### P15

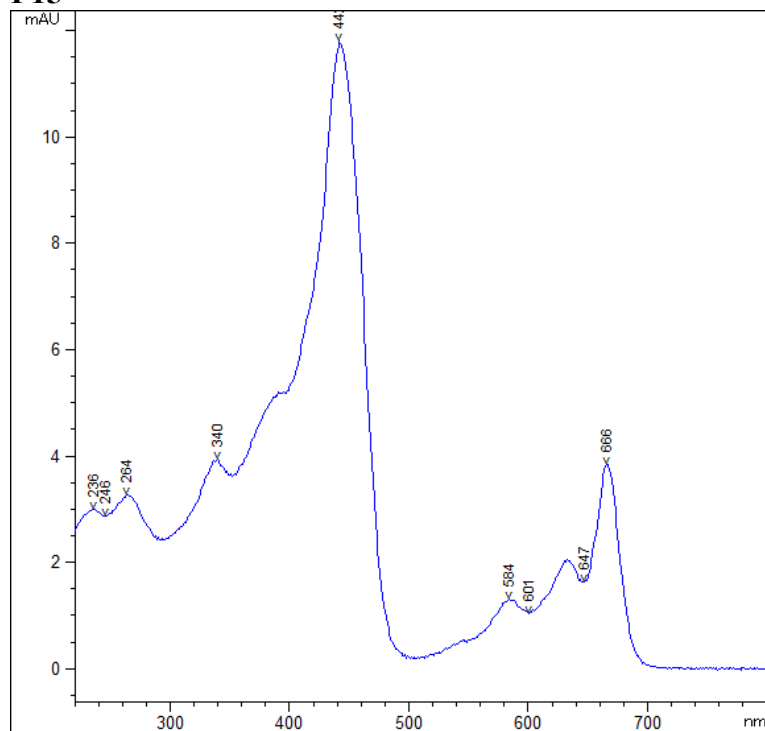

### P16

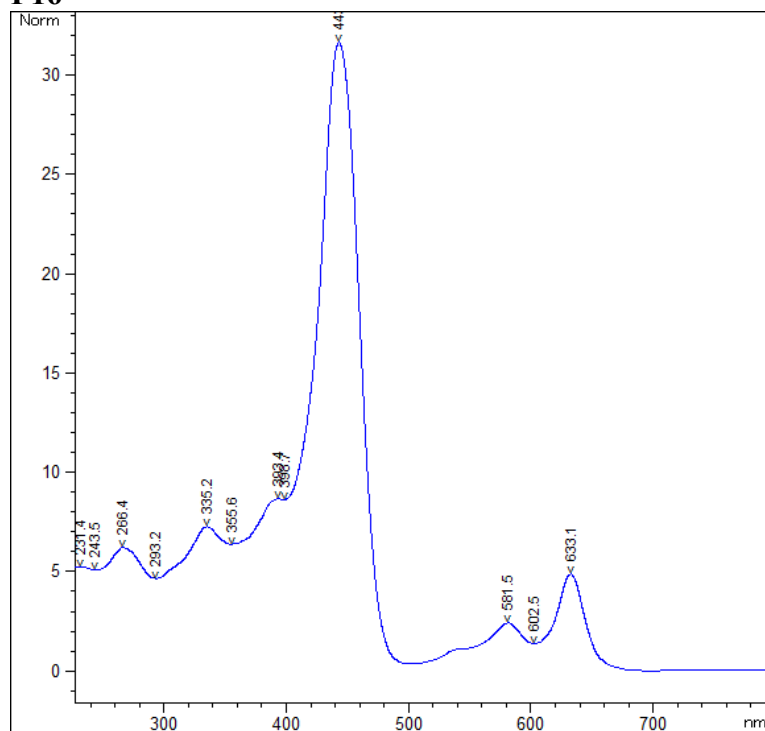



### P17

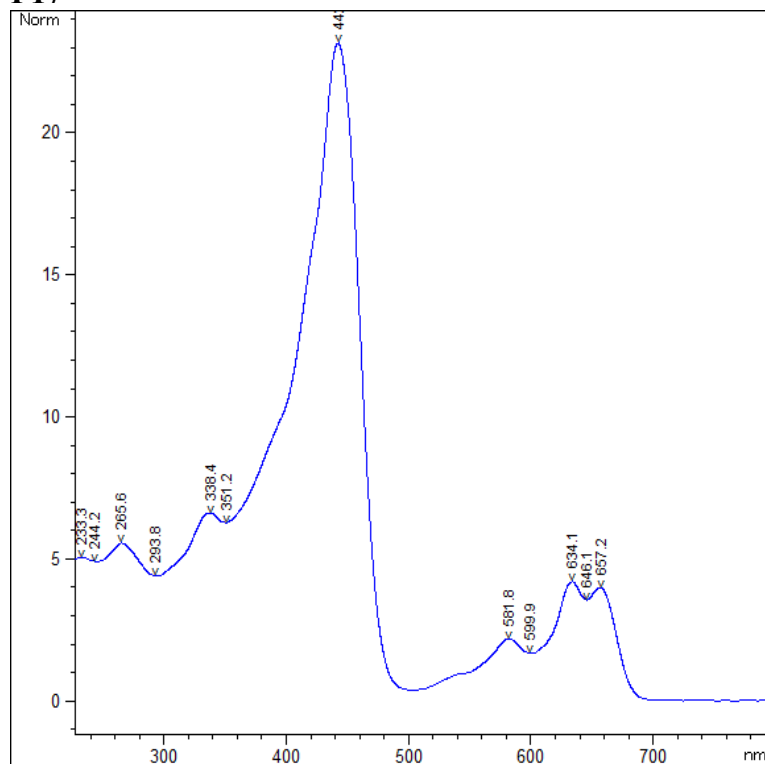

### P18

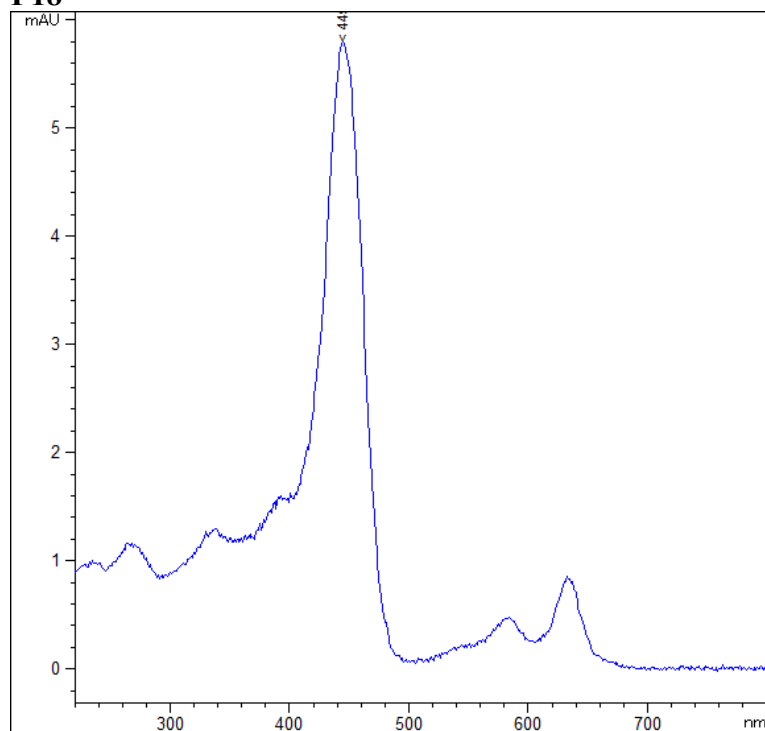

### P19

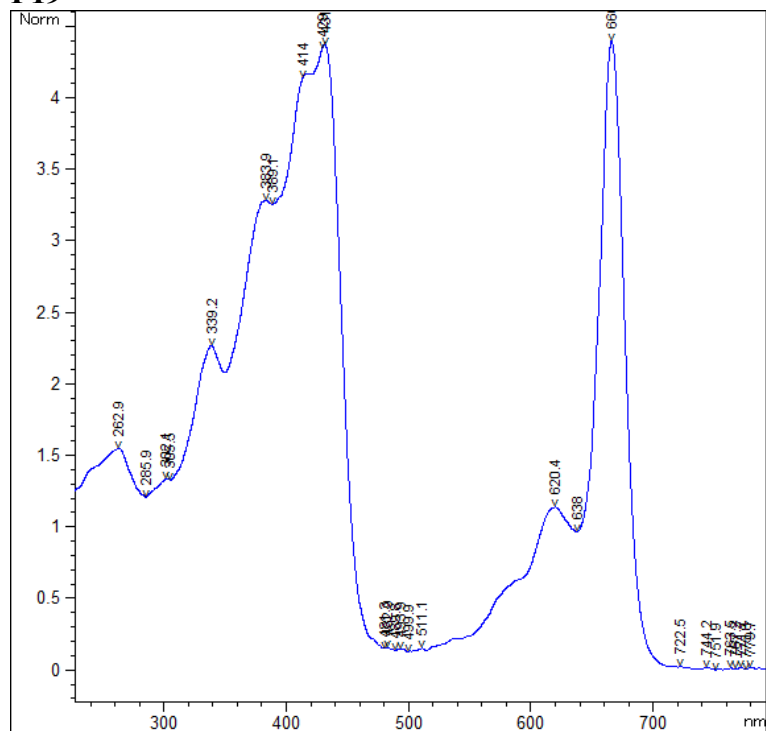

### P20

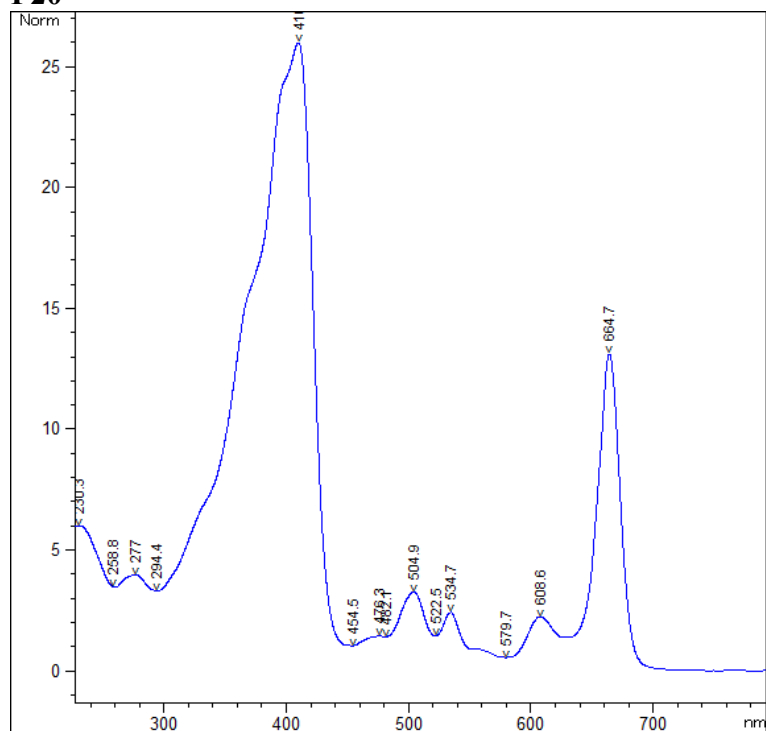

### P21

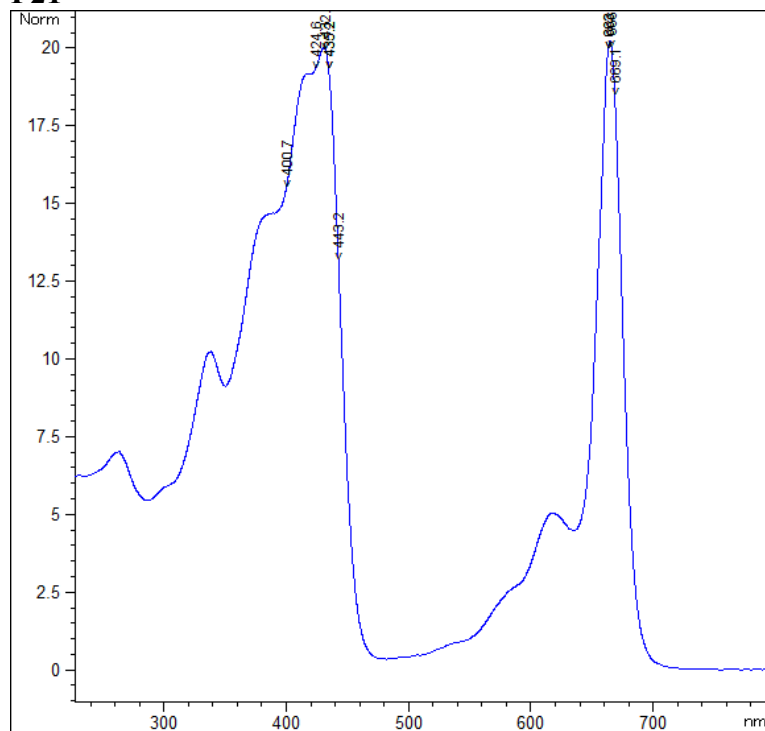

### P22

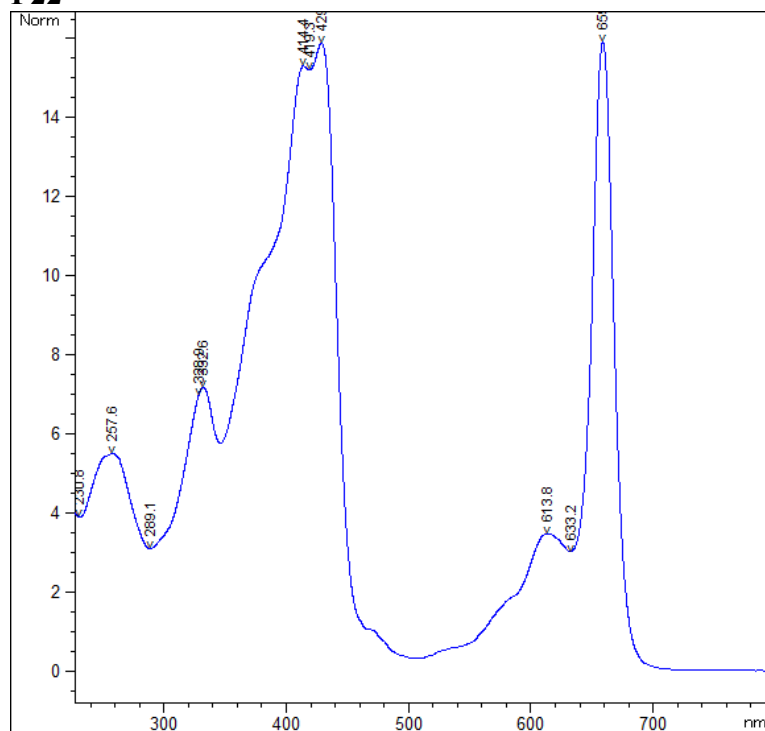

### P23

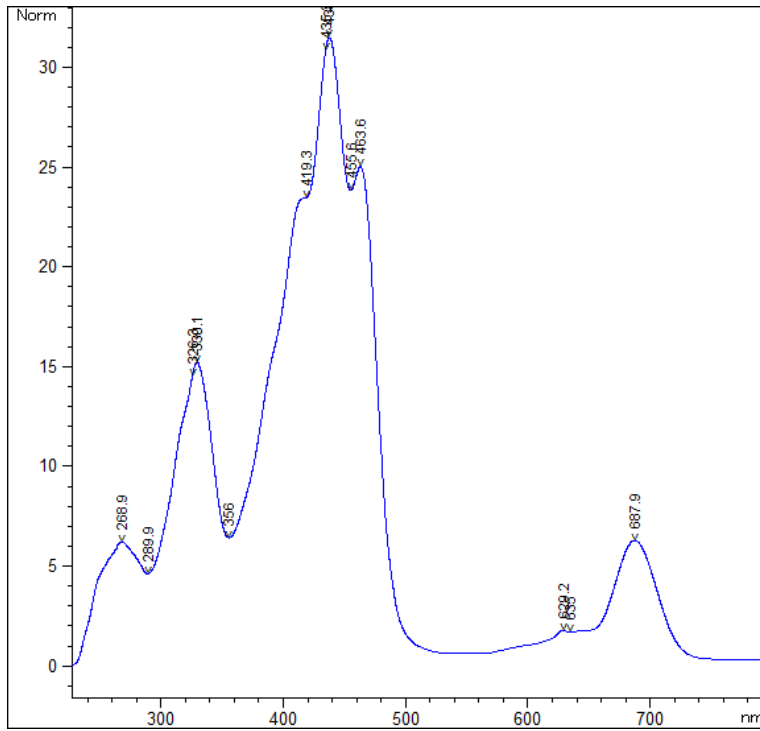

### P24

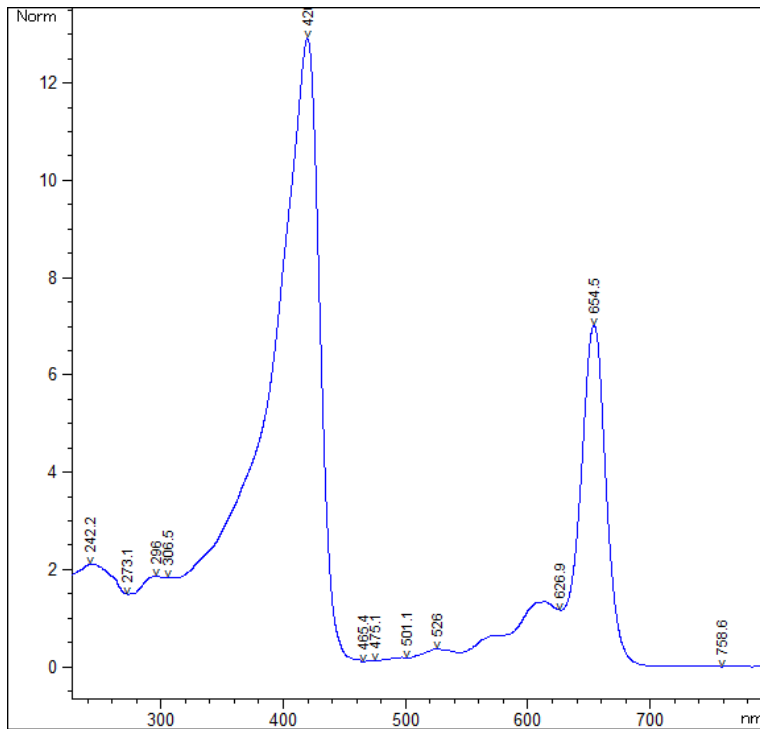

### P25

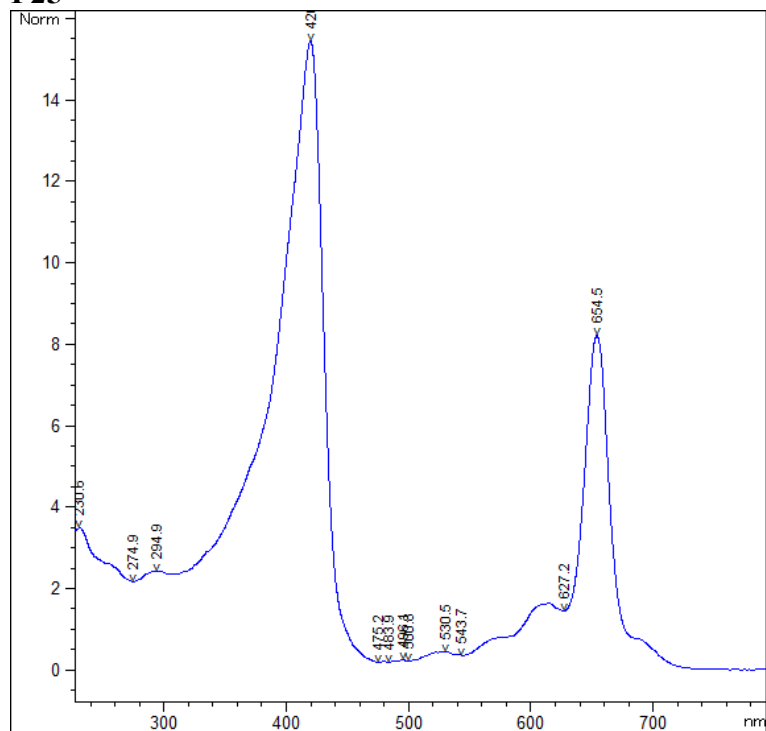

### P26

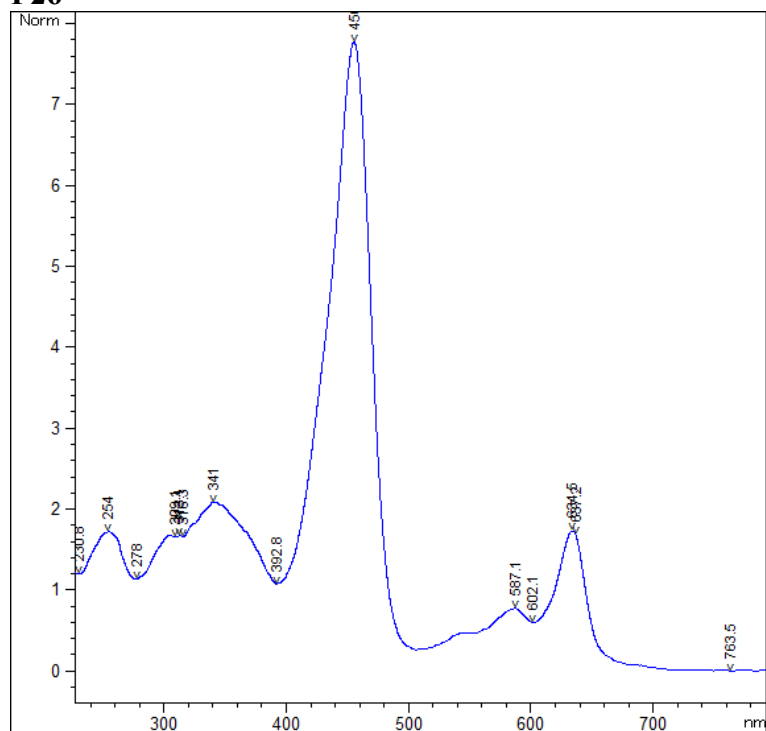

**P27**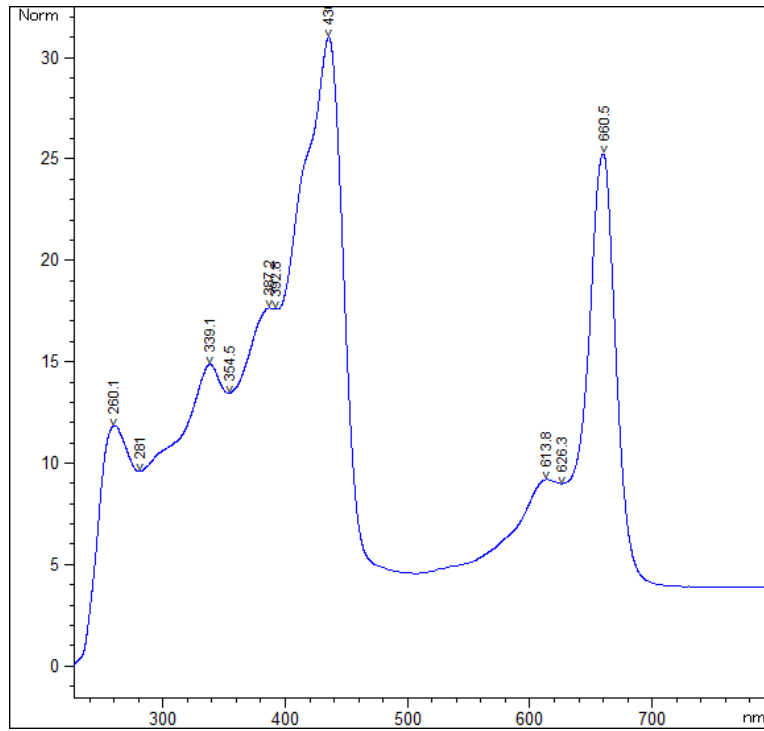**P28**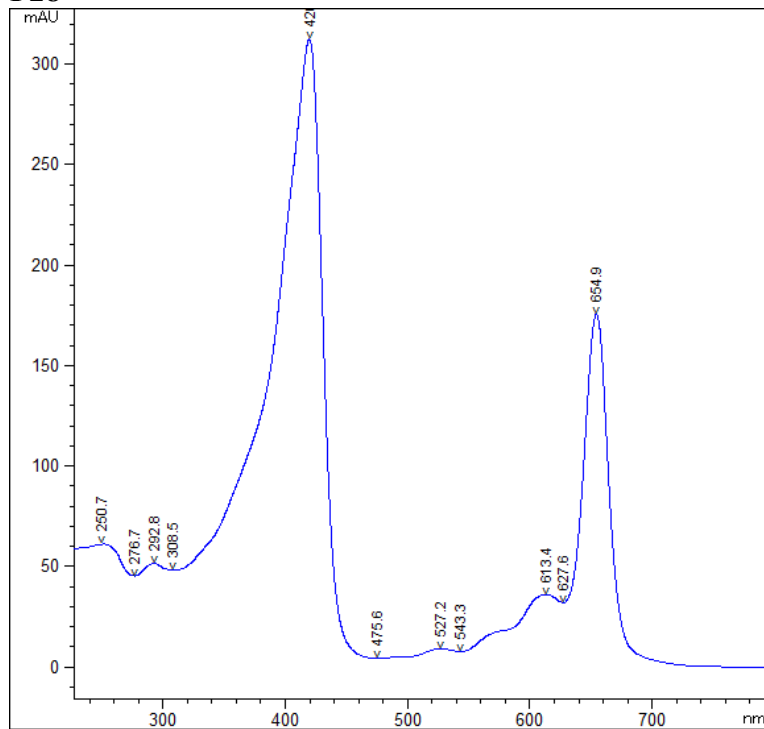

### P29

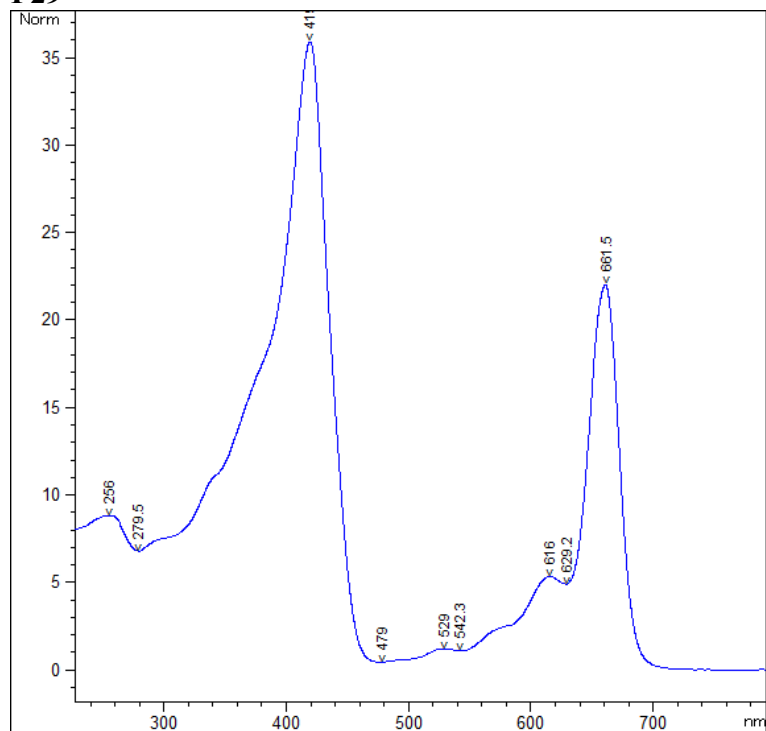

### P30

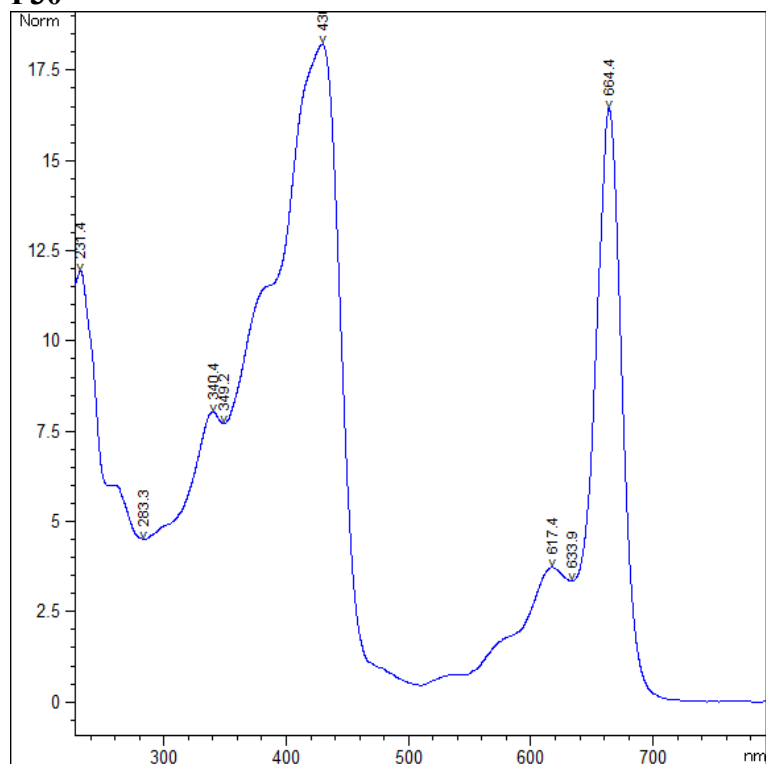

### P31

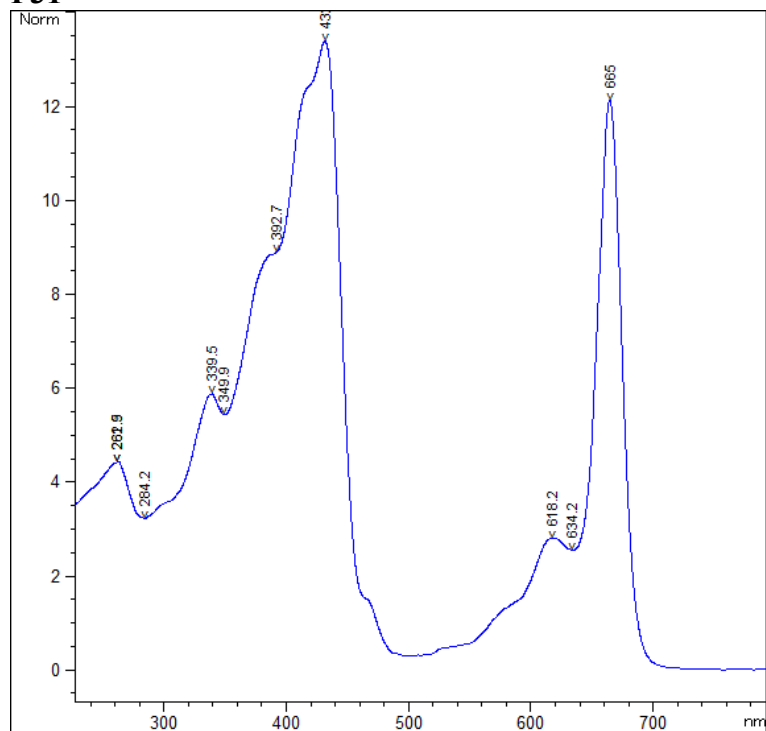

### P32

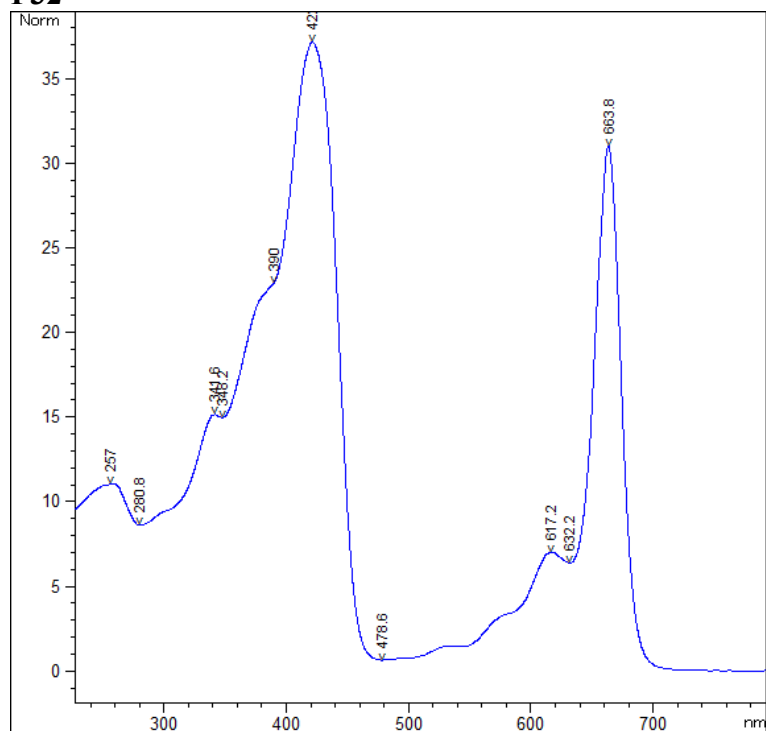



### P33

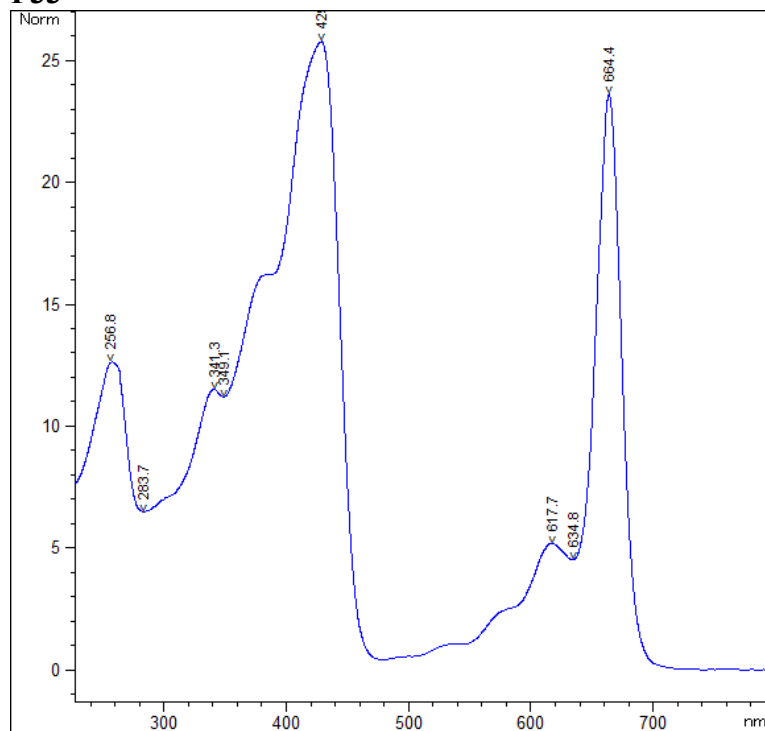

### P34

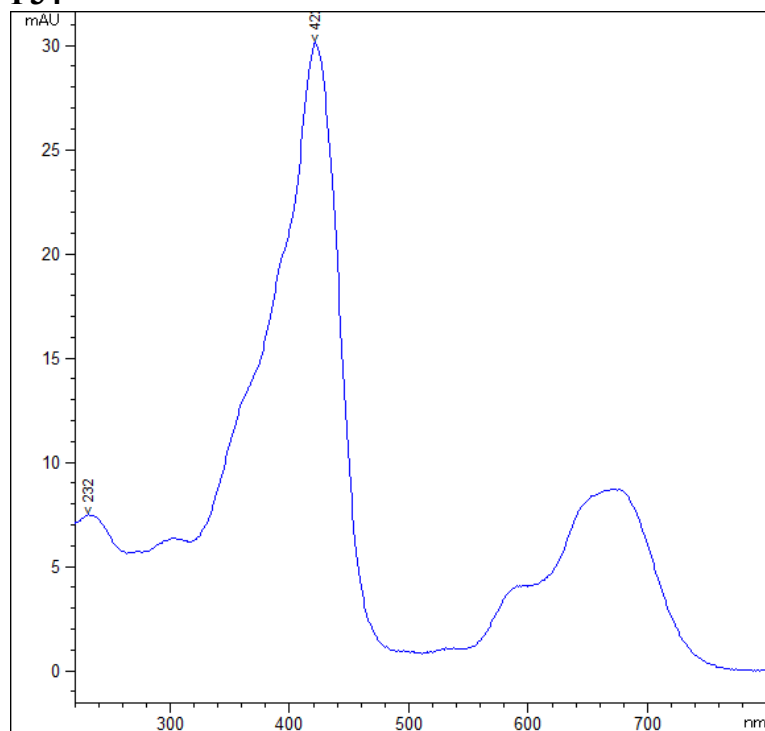

### P35

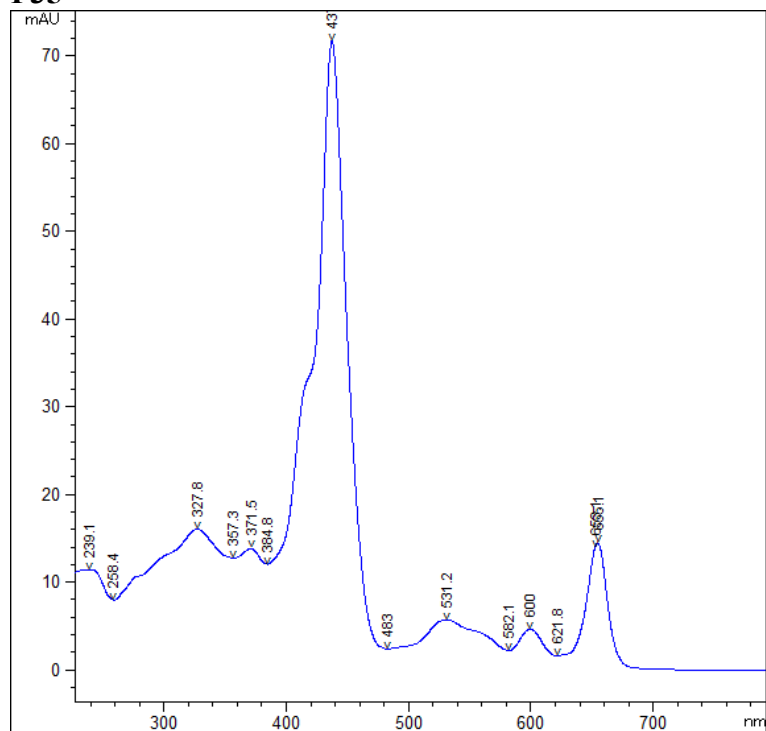

### PCar1

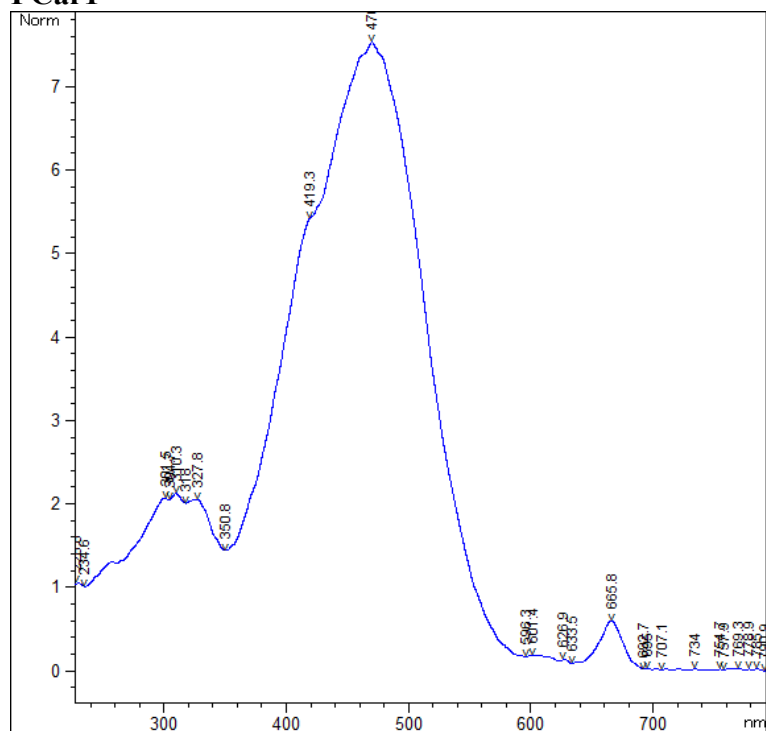

### PCar 2

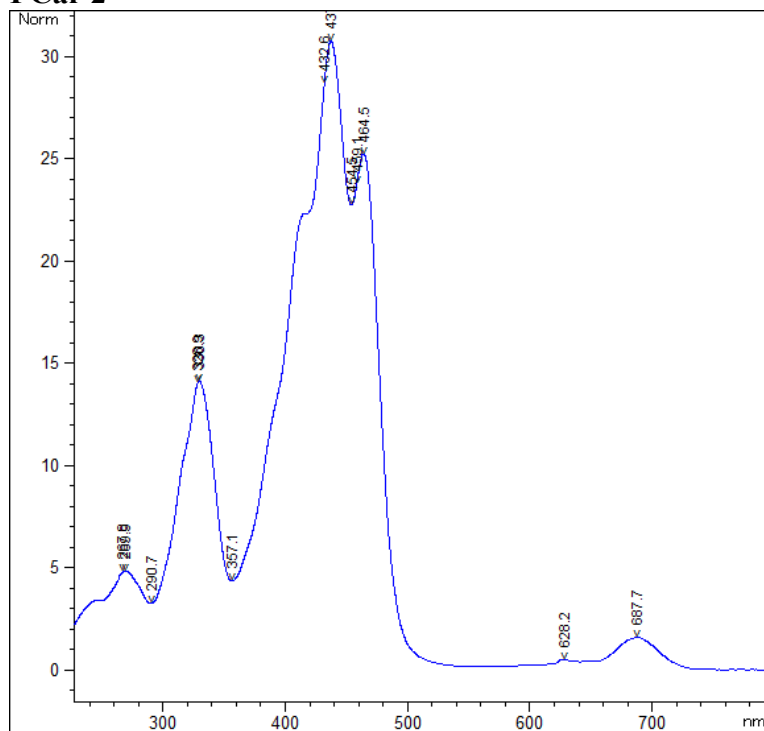

### PCar3

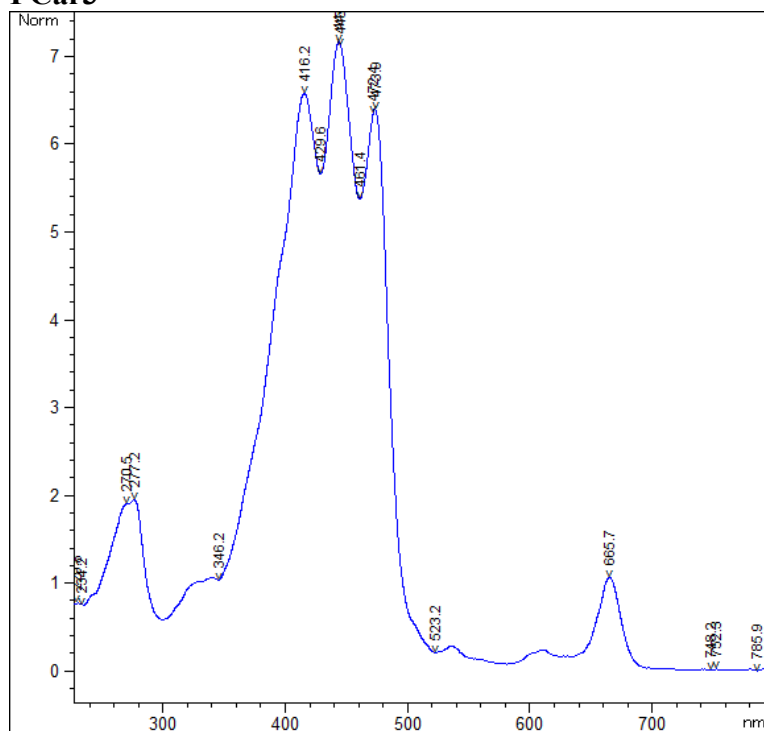

### PCar4

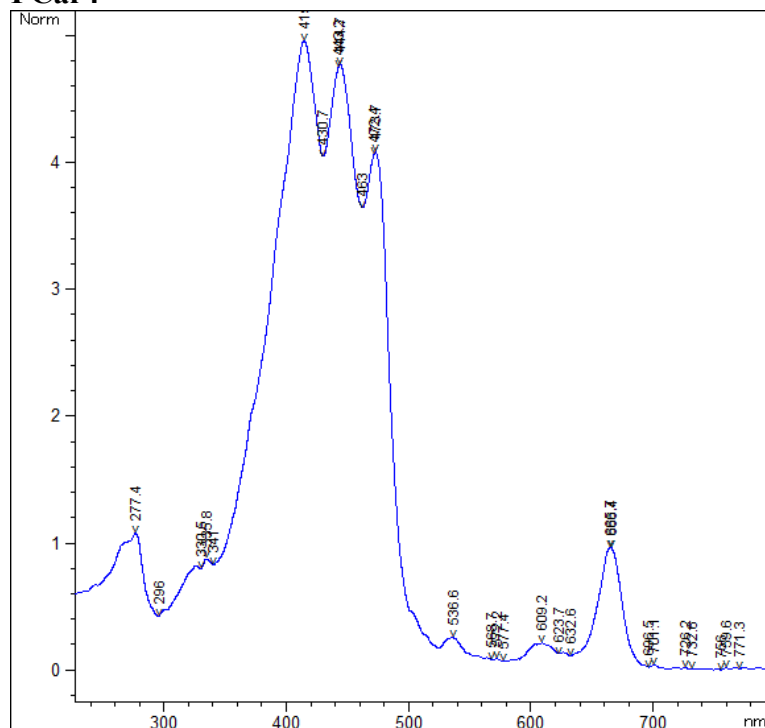

### PCar5

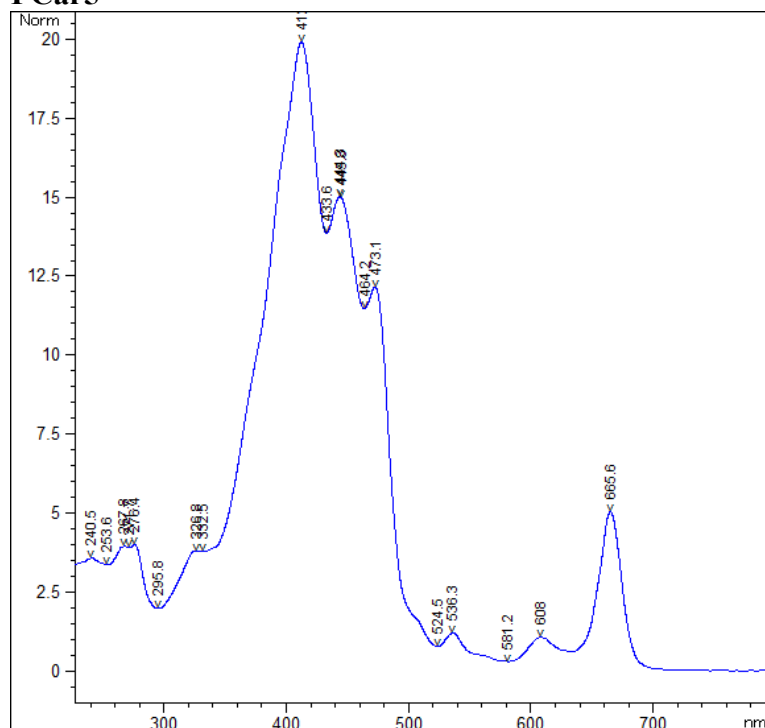

# PCar6

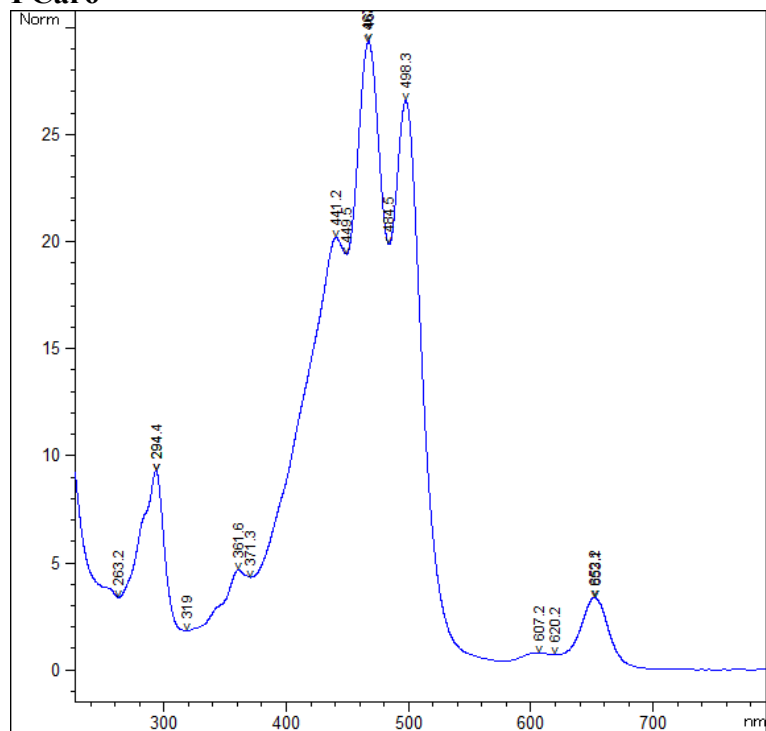

**Car1**

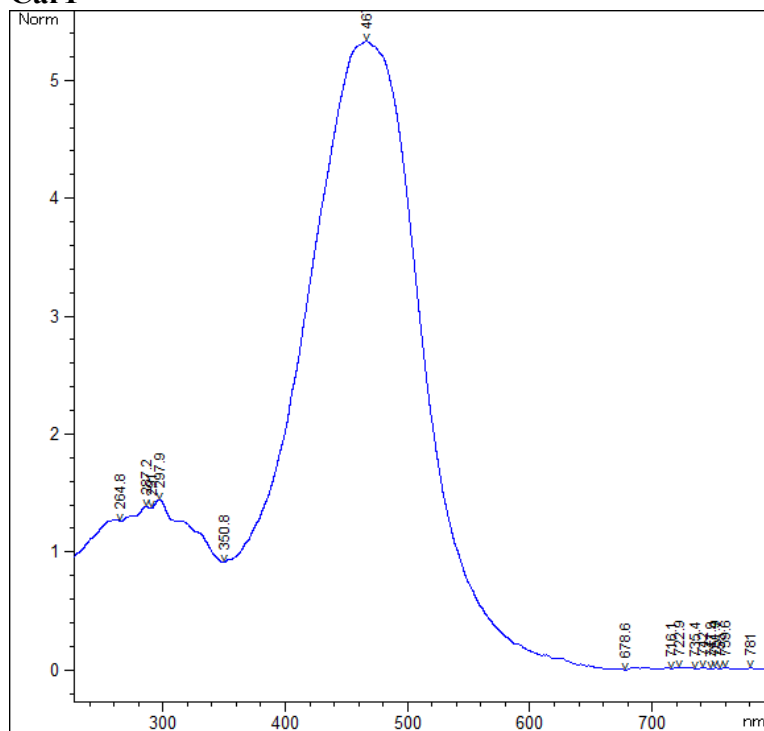

**Car2**

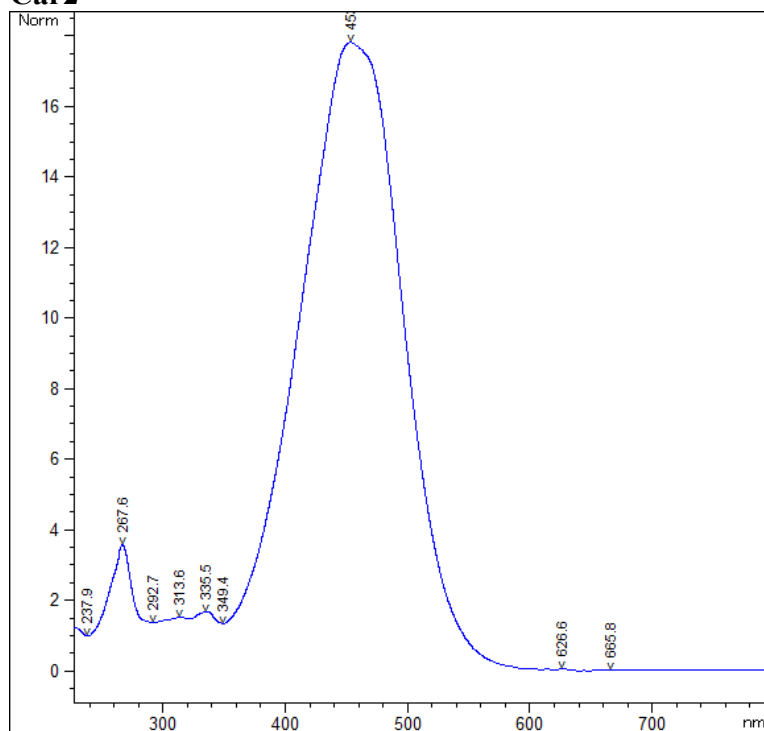

### Car3

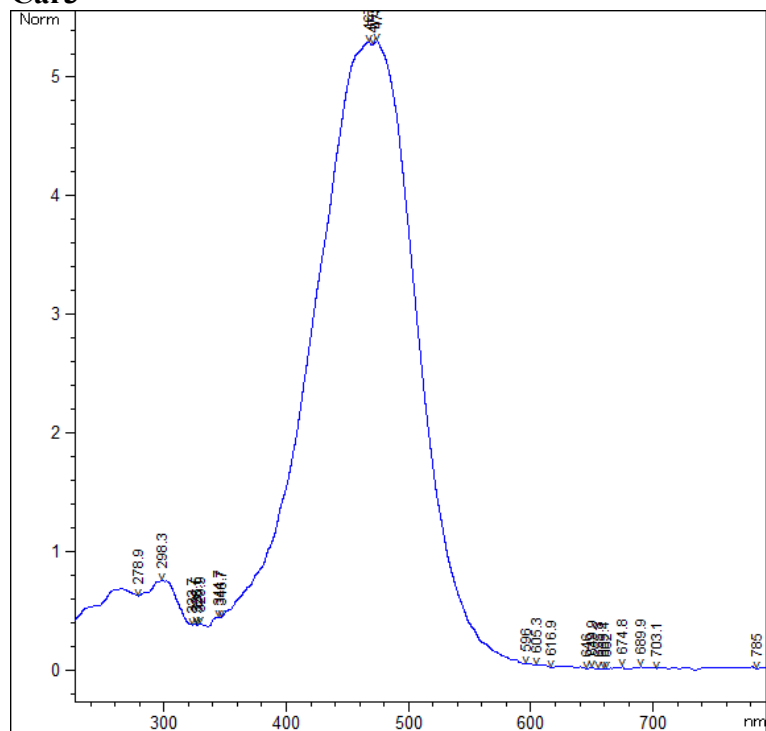

### Car4

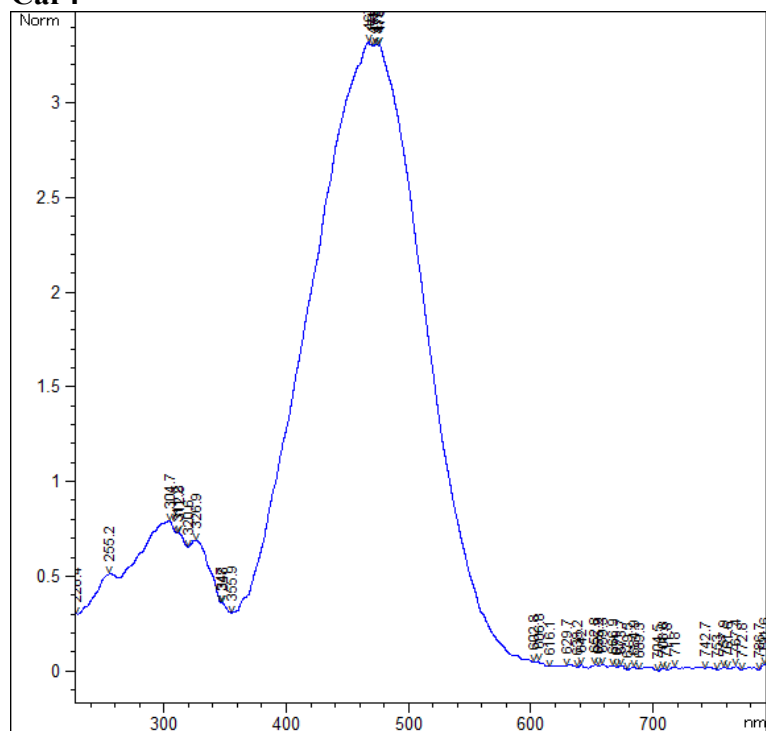

### Car5

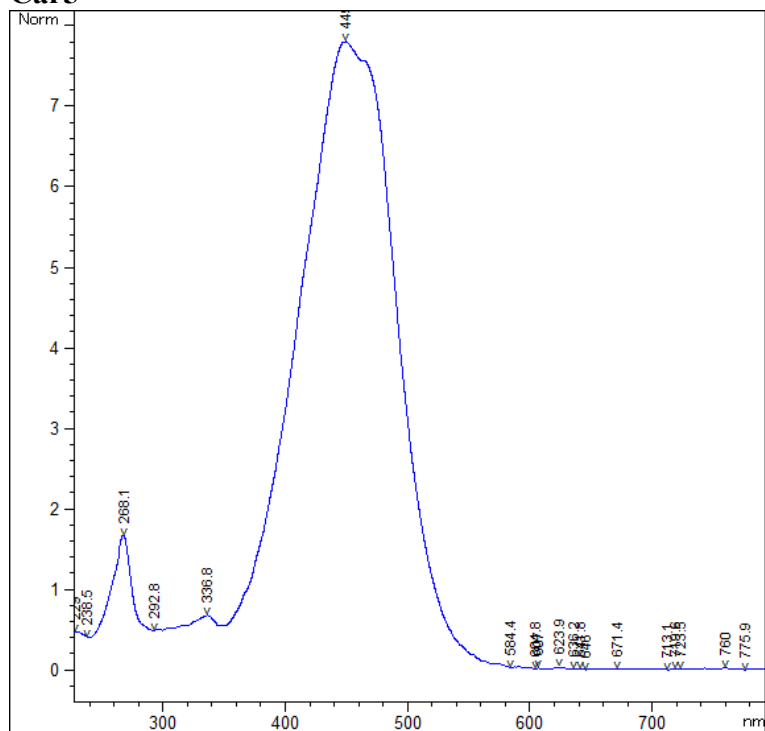

### Car6

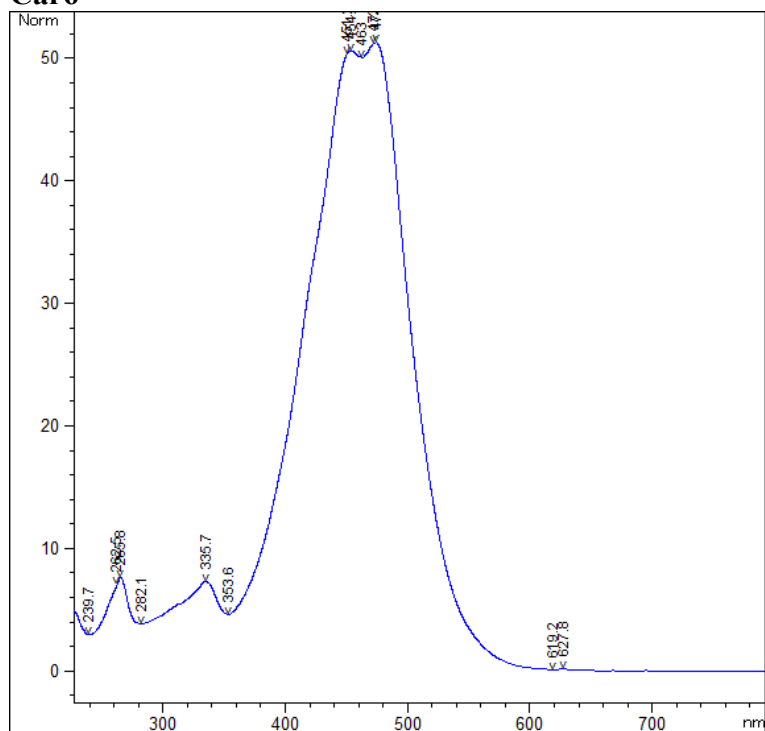



### Car7

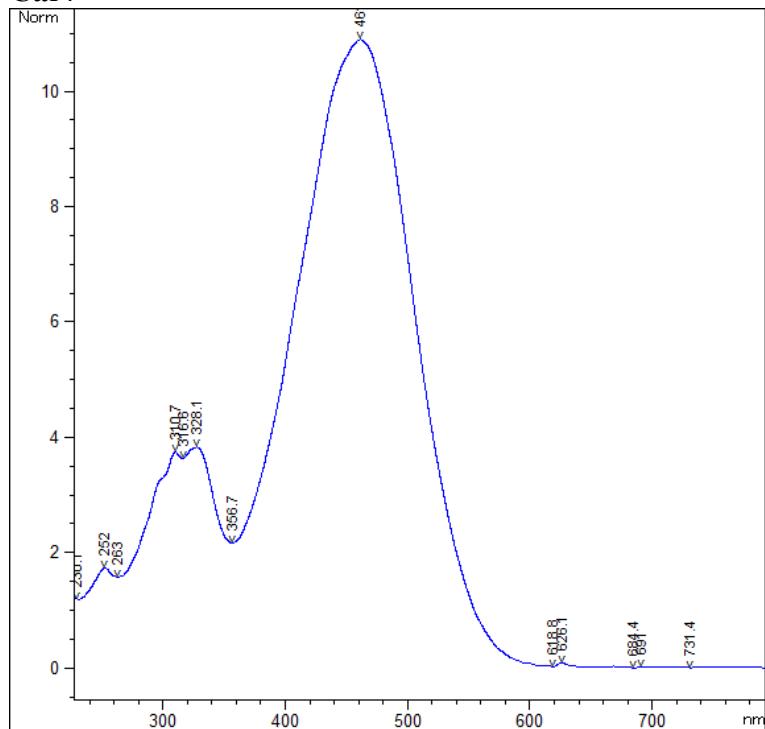

### Car8

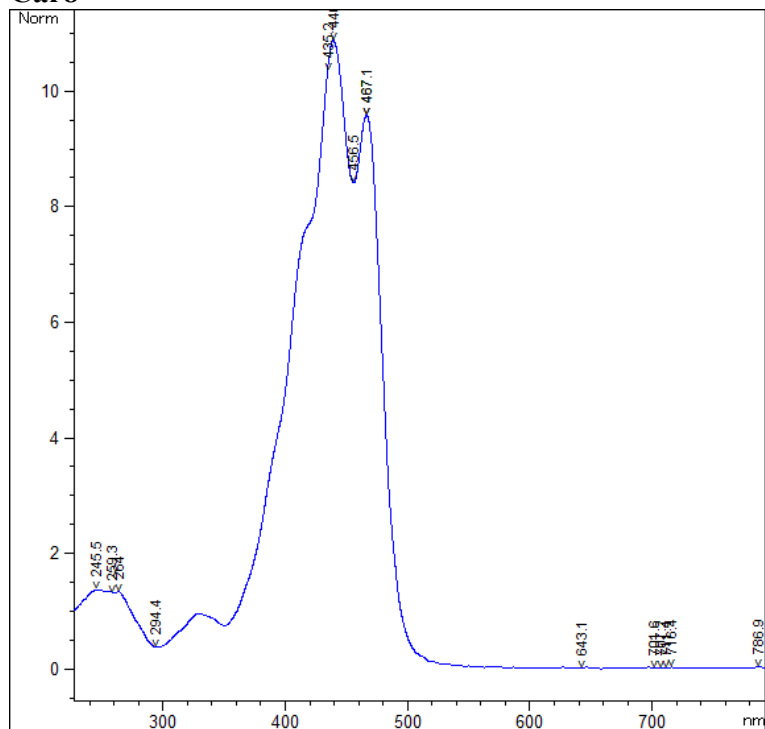

### Car9

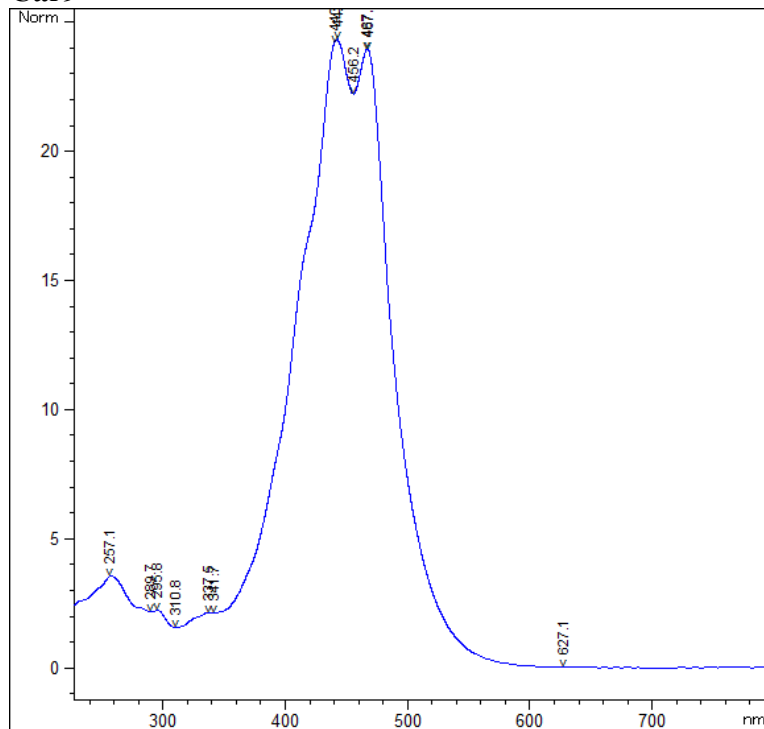

### Car10

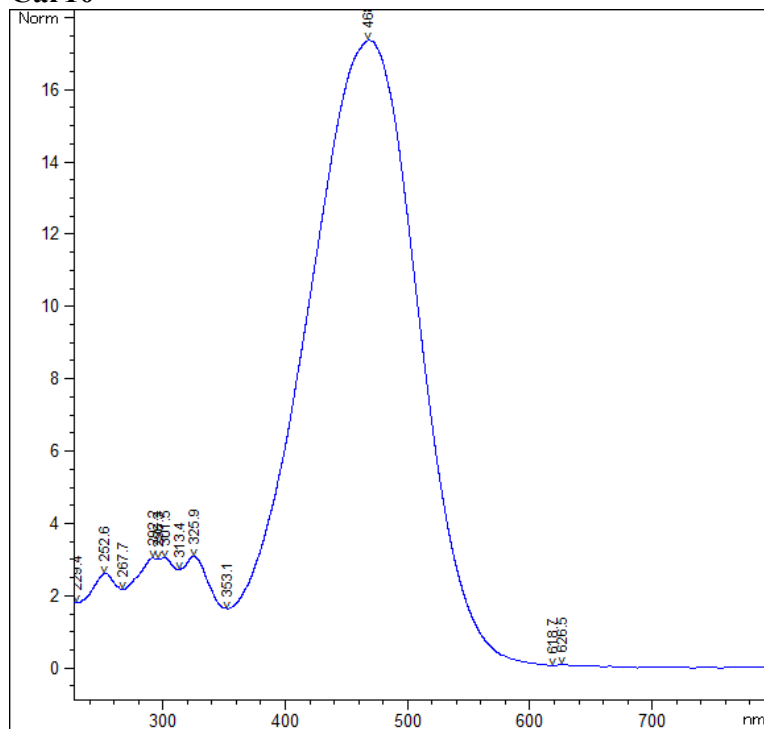

**Car11**

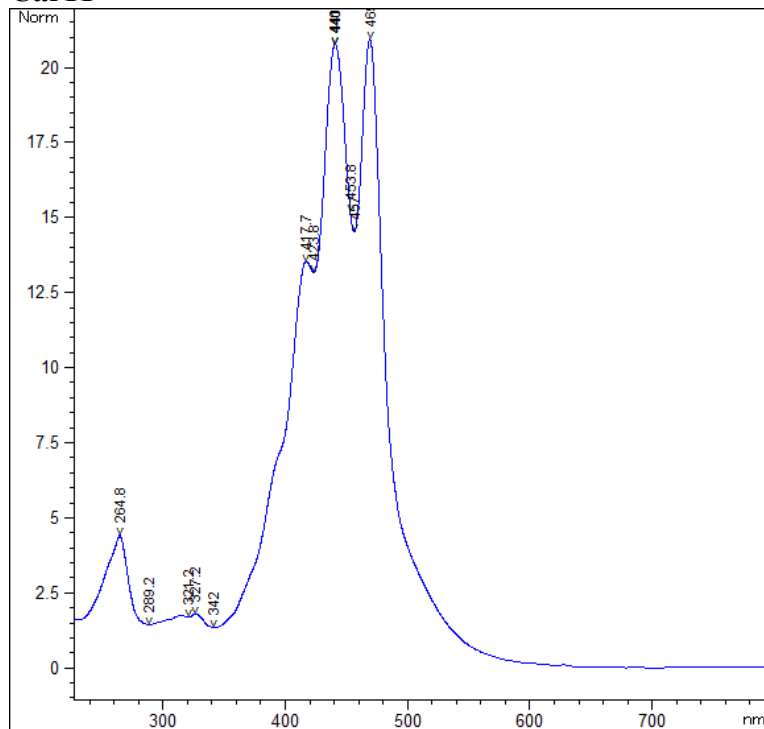

**Car12**

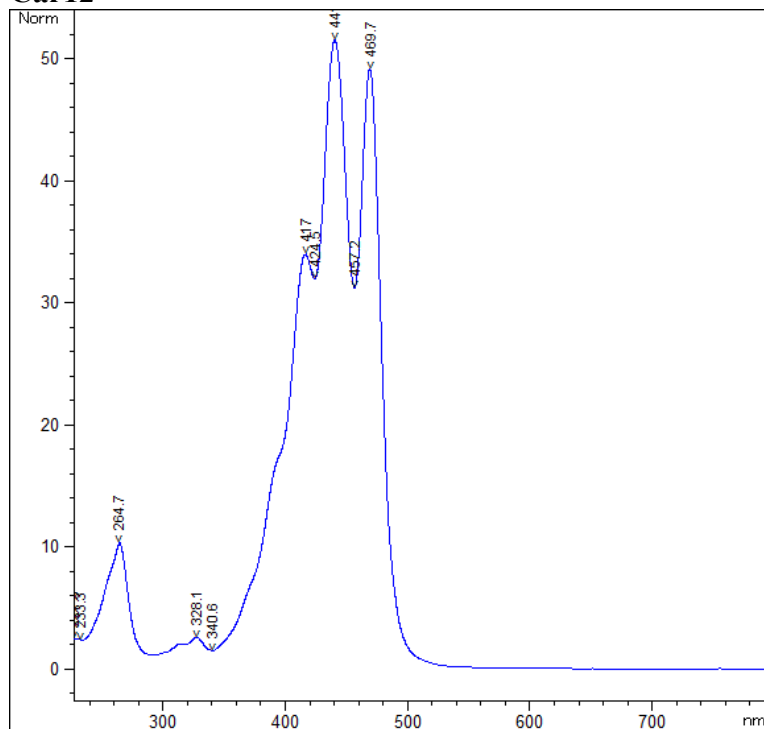

### Car13

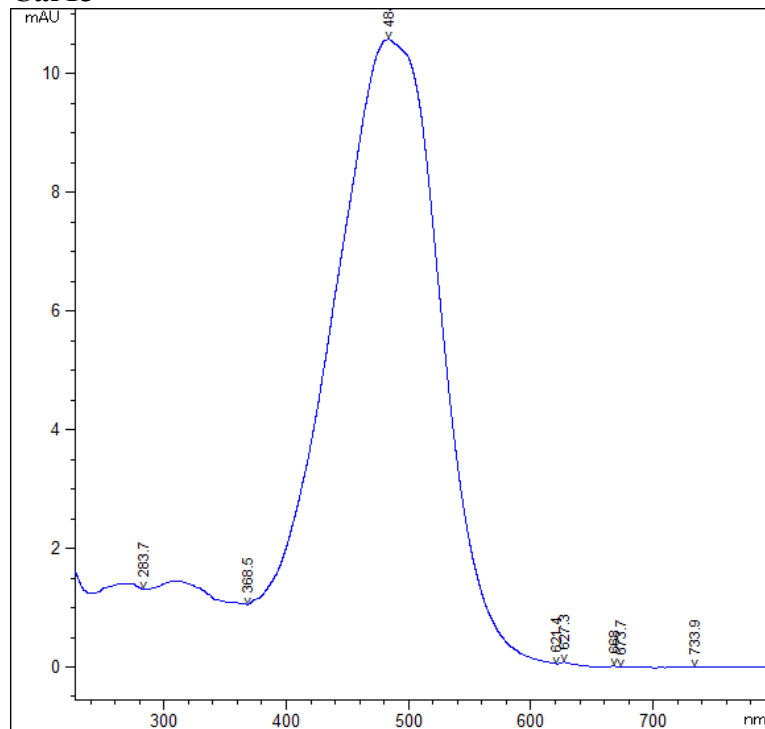

### Car14

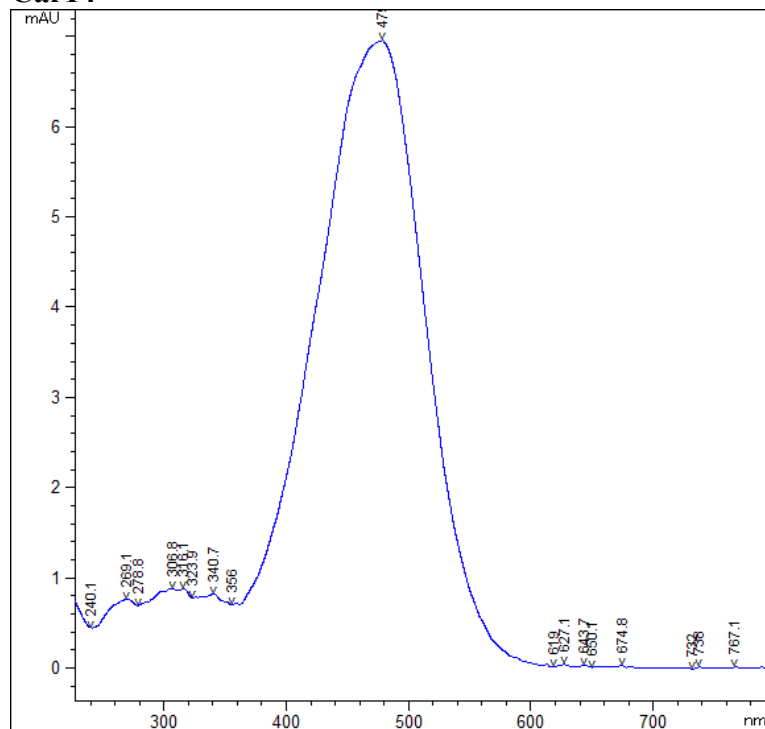

### Car15

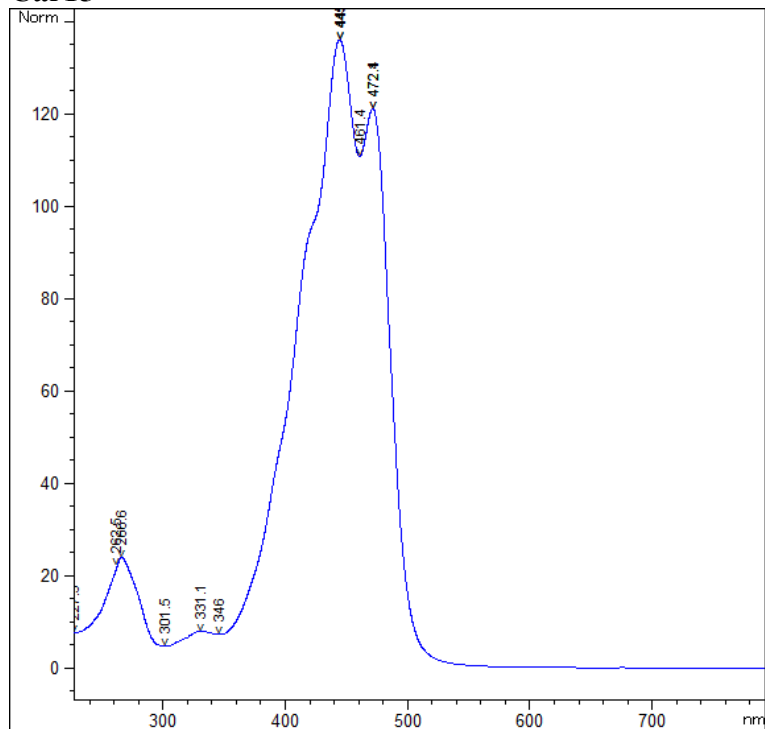

### Car16

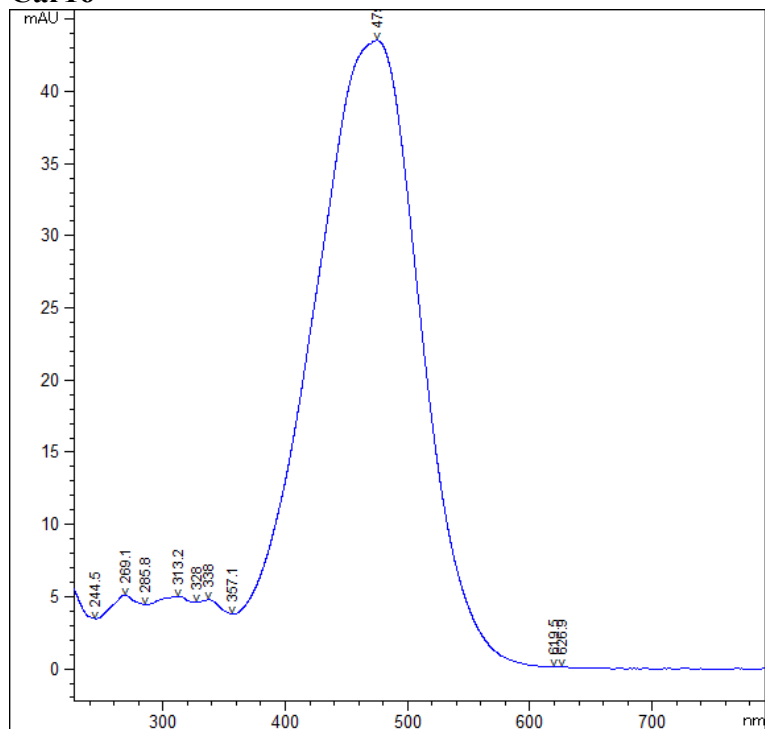

### Car17

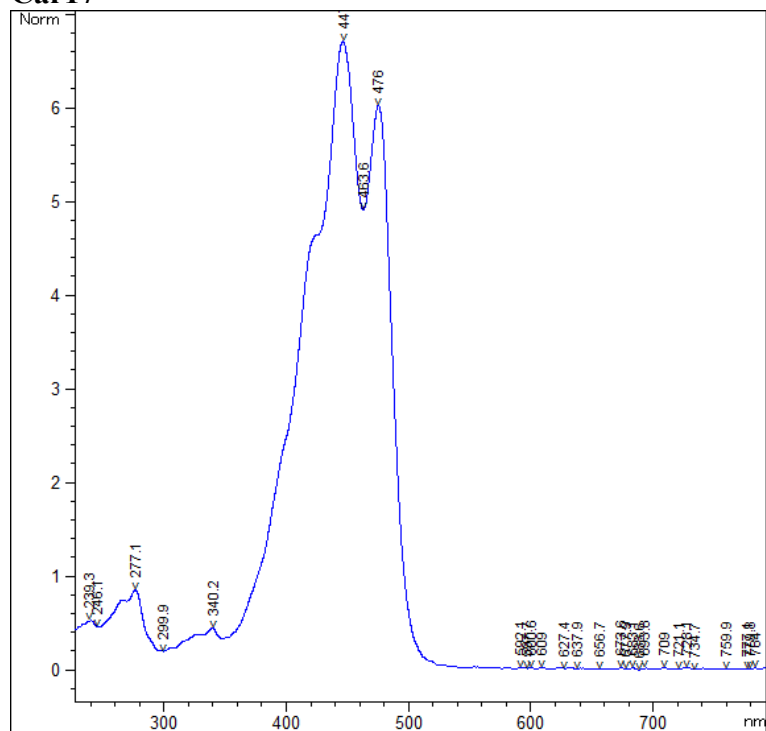

### Car18

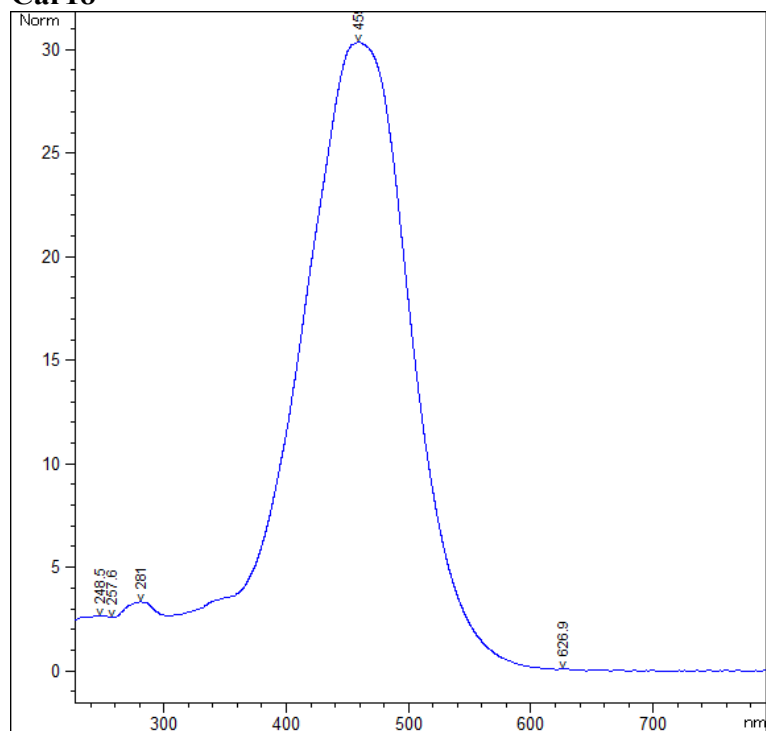

### Car19

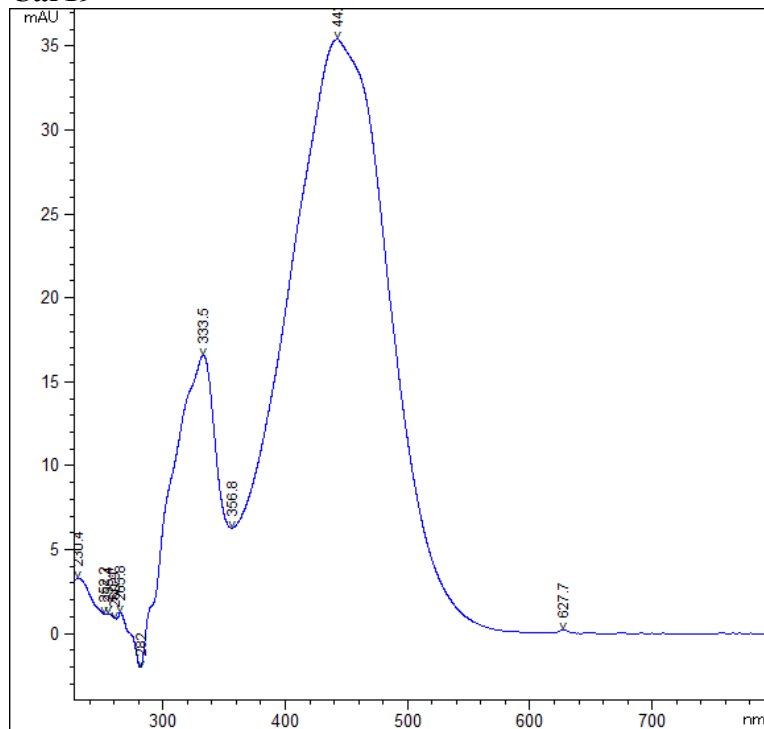

### Car20

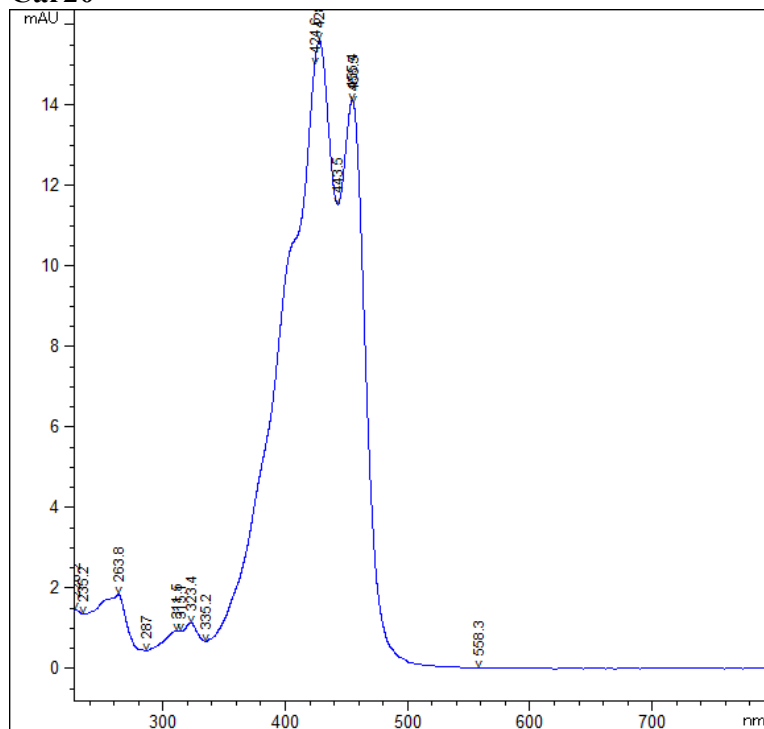

**Car21**

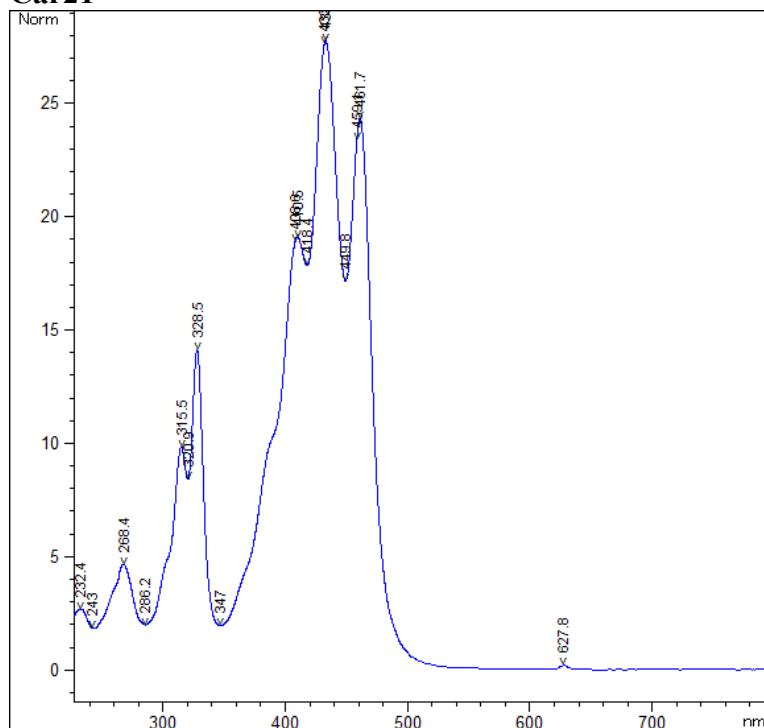

**Car22**

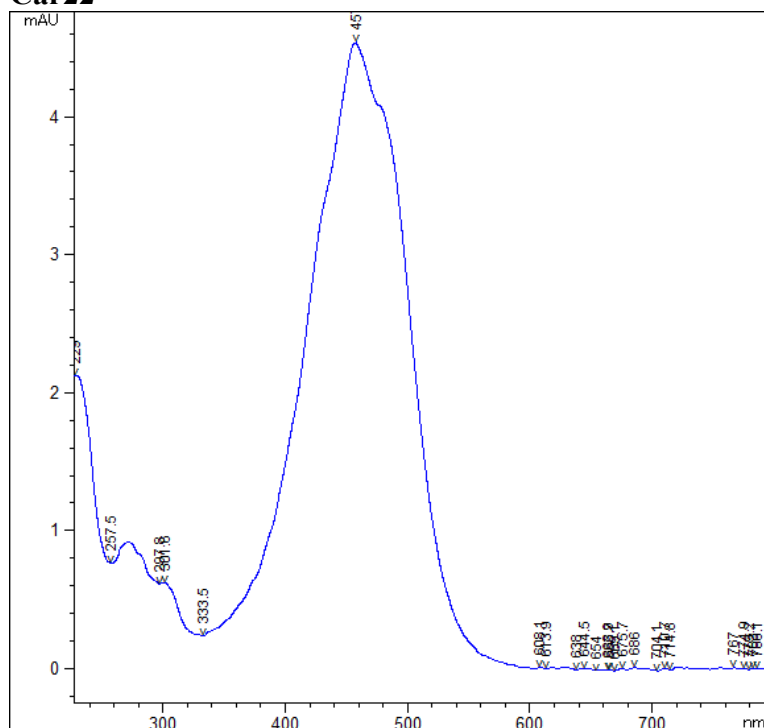



**Car23**

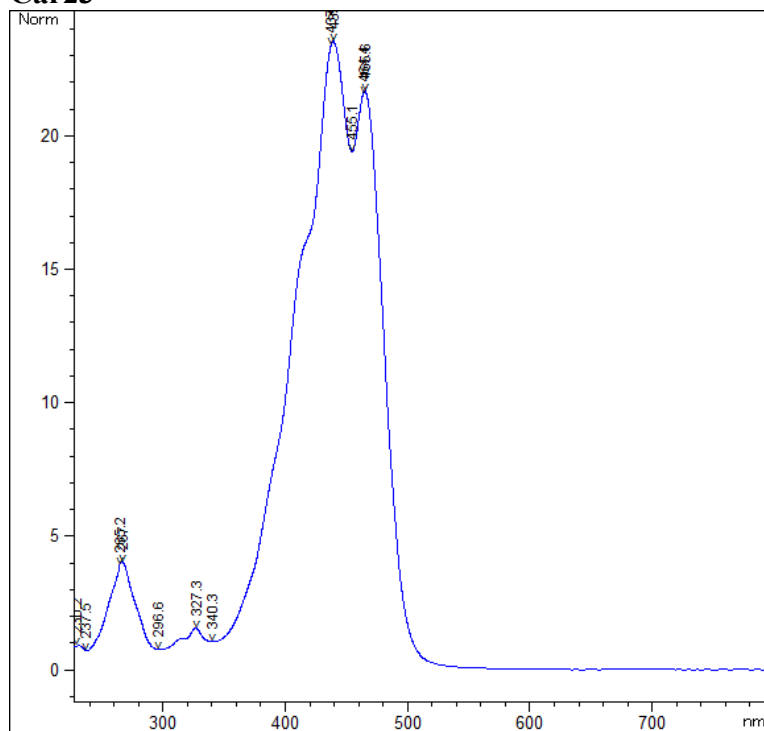

**Car24**

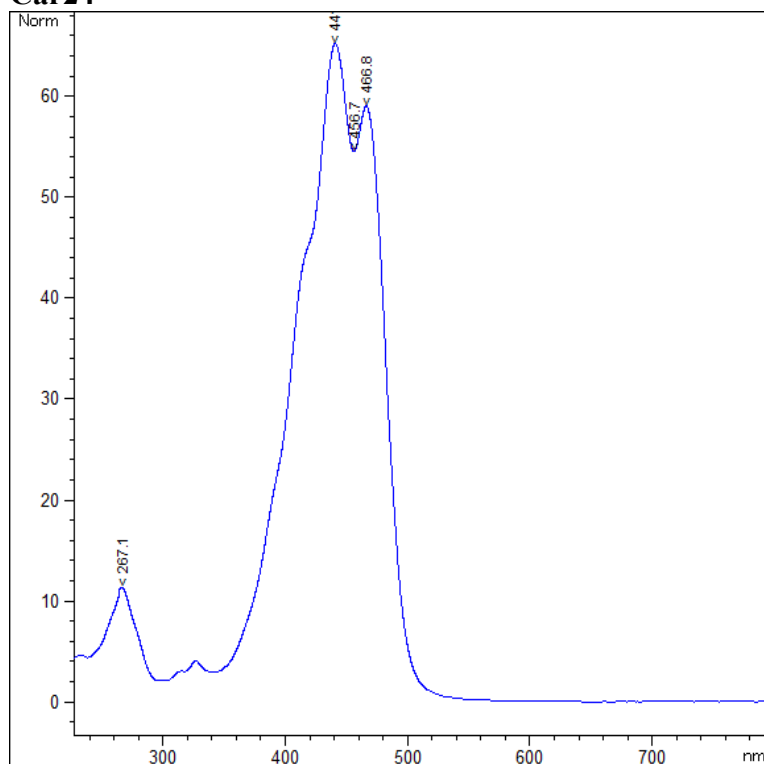

**Car25**

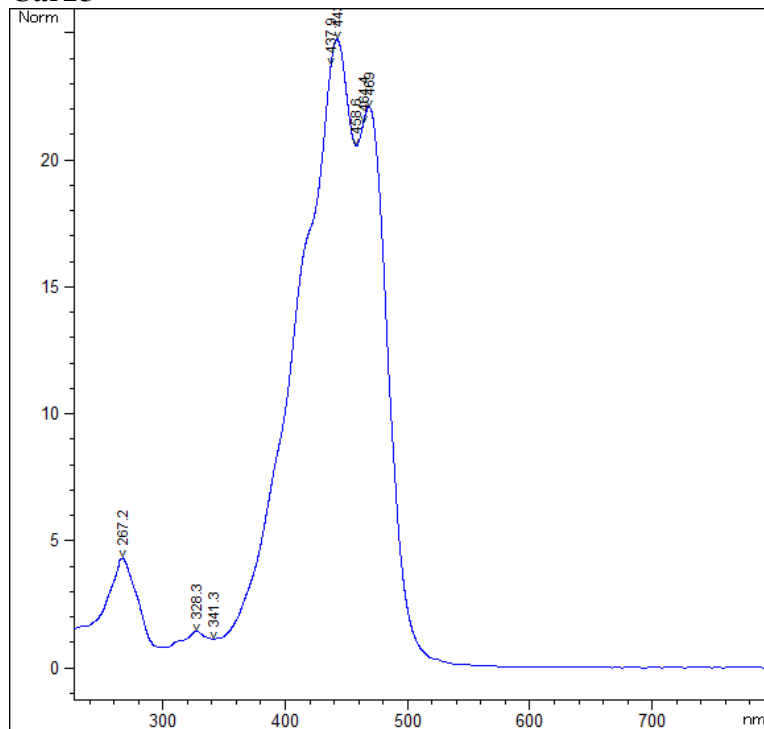

**Car 26**

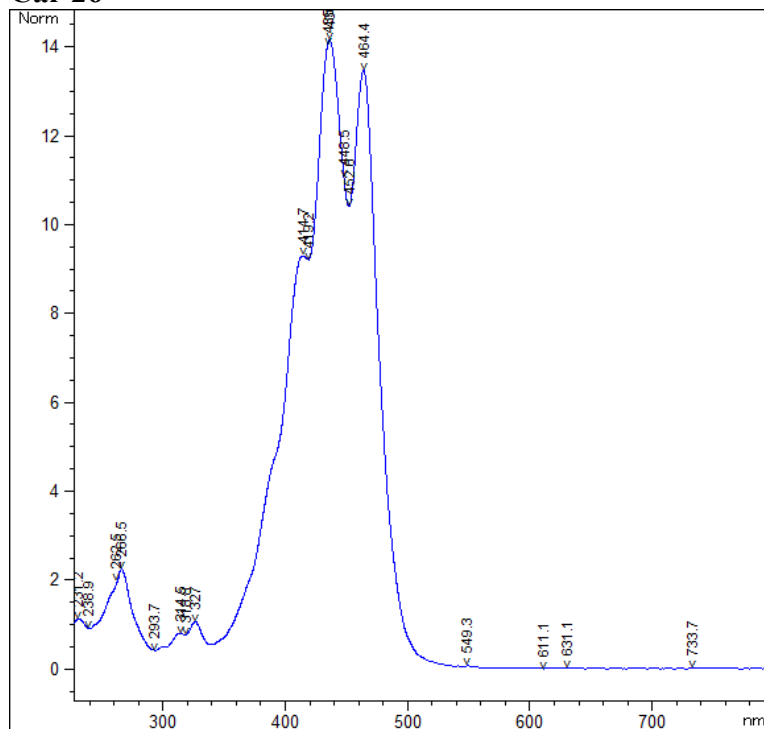

### Car27

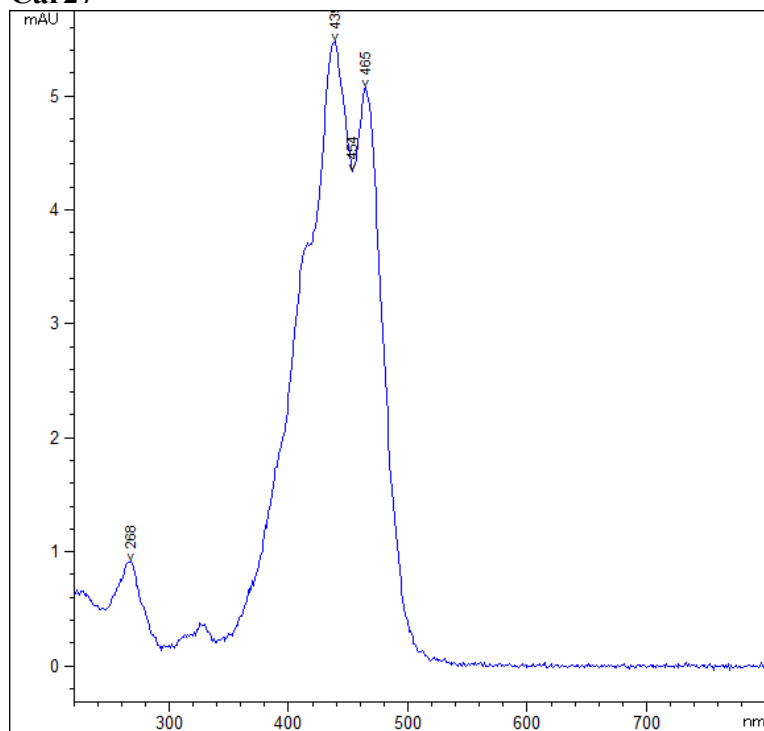

### Car28

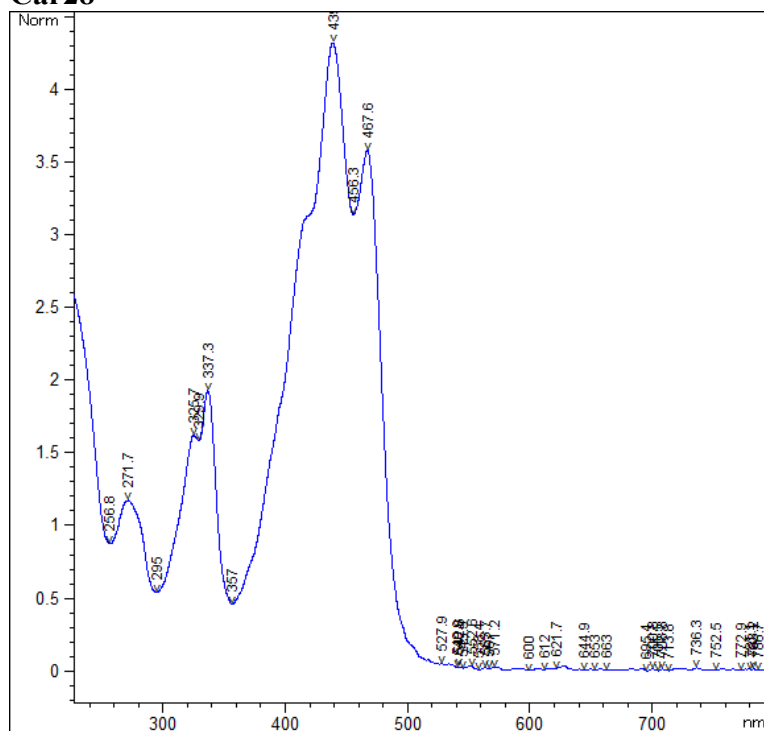

### Car29

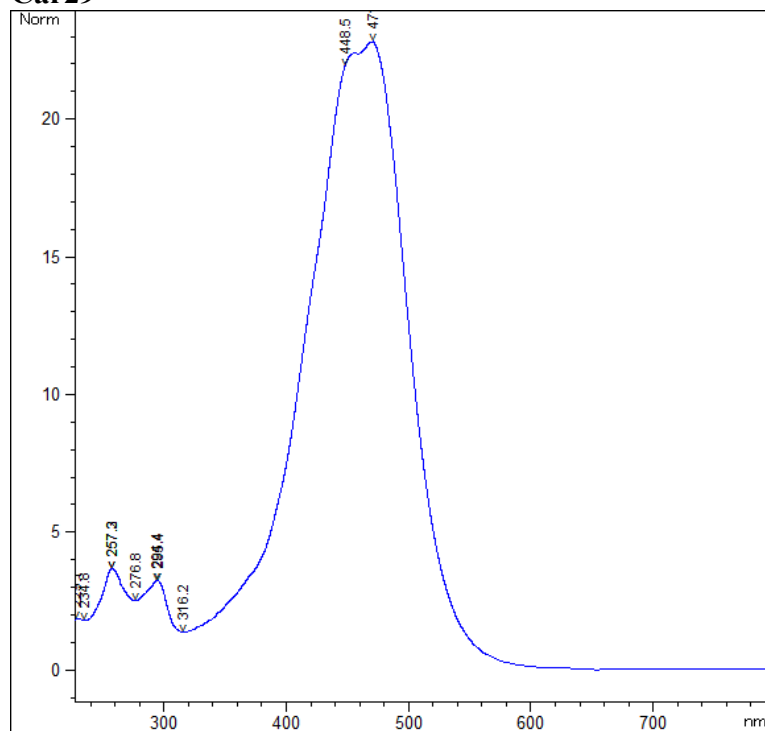

### Car30

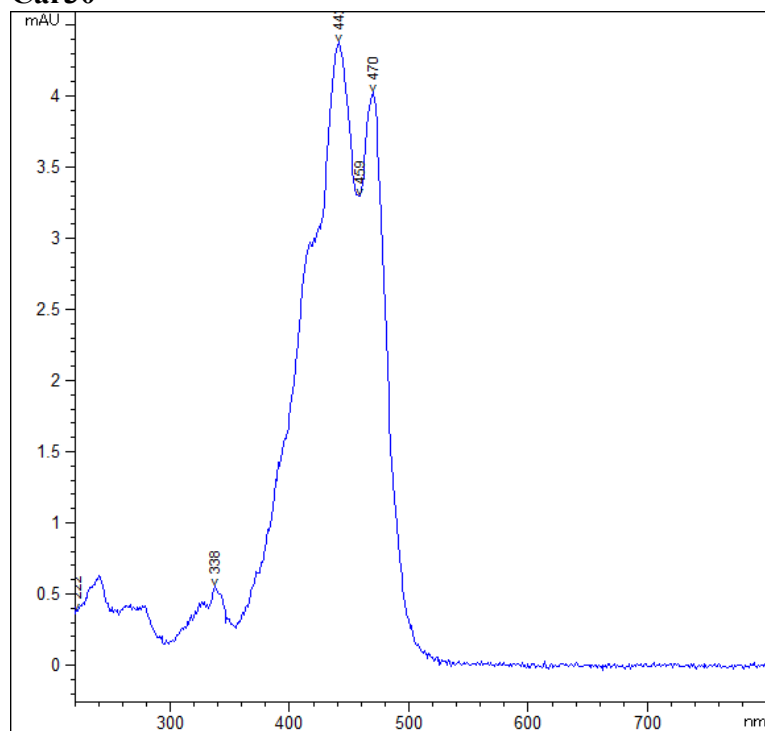

### Car31

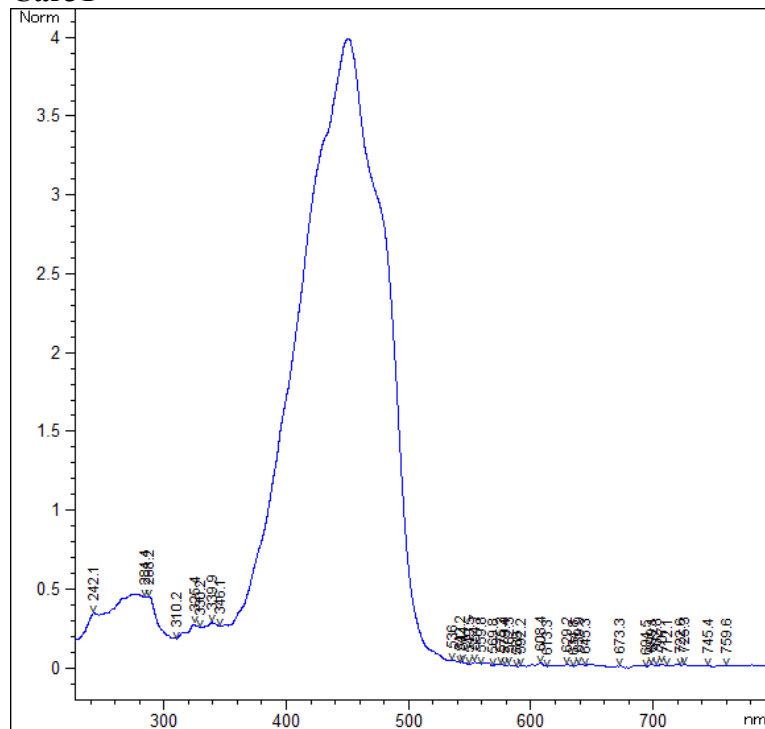

### Car32

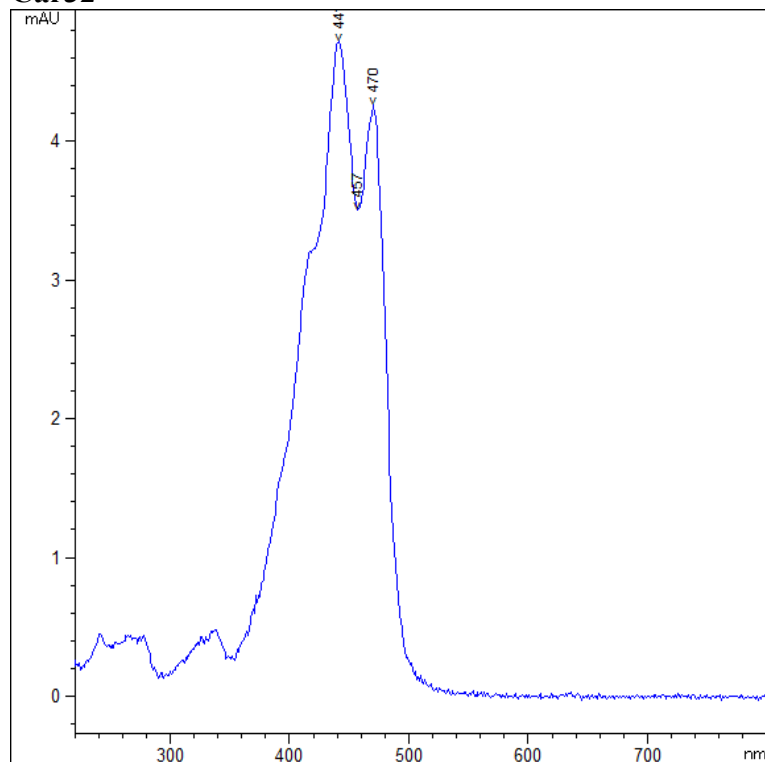

### Car33

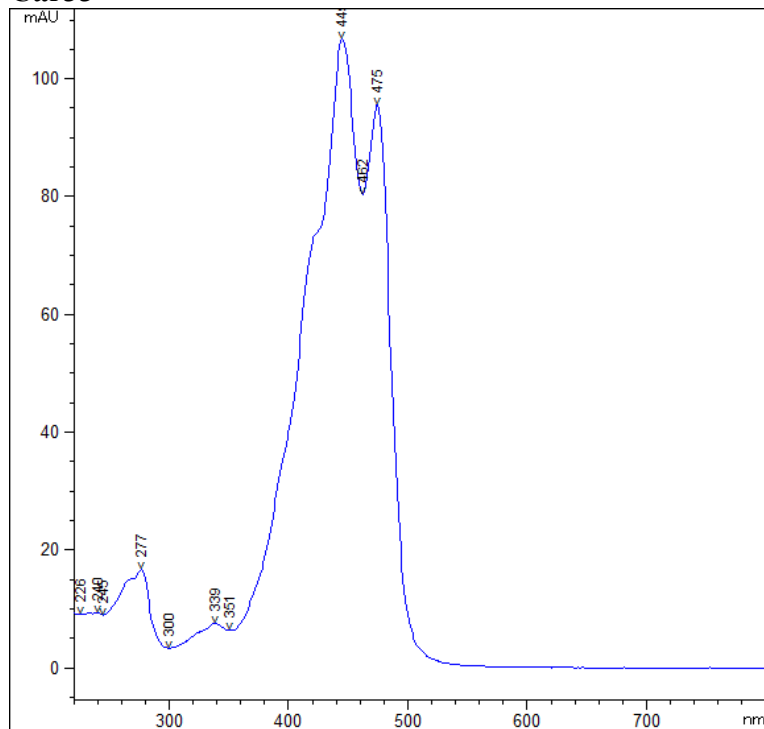

### Car34

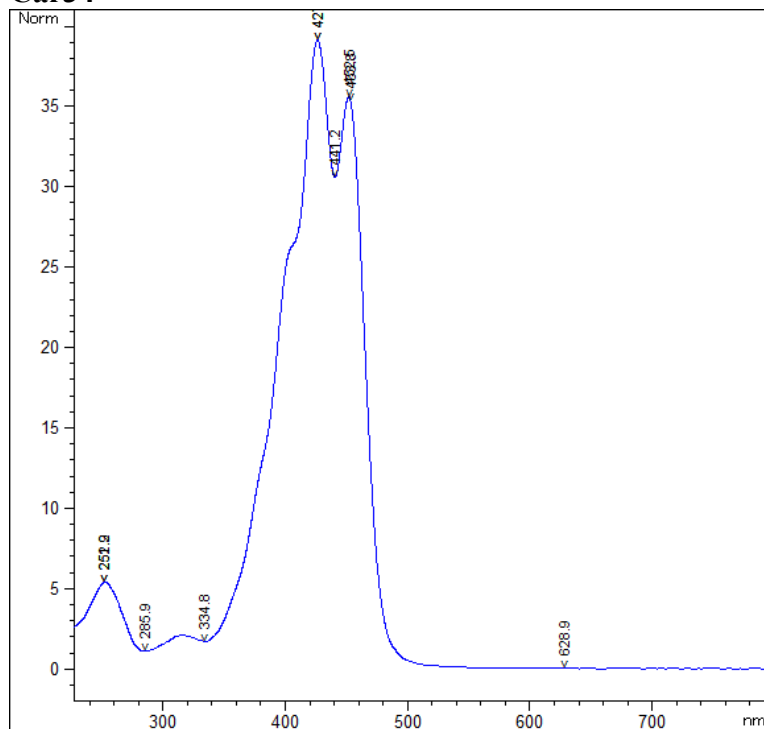

### Car35

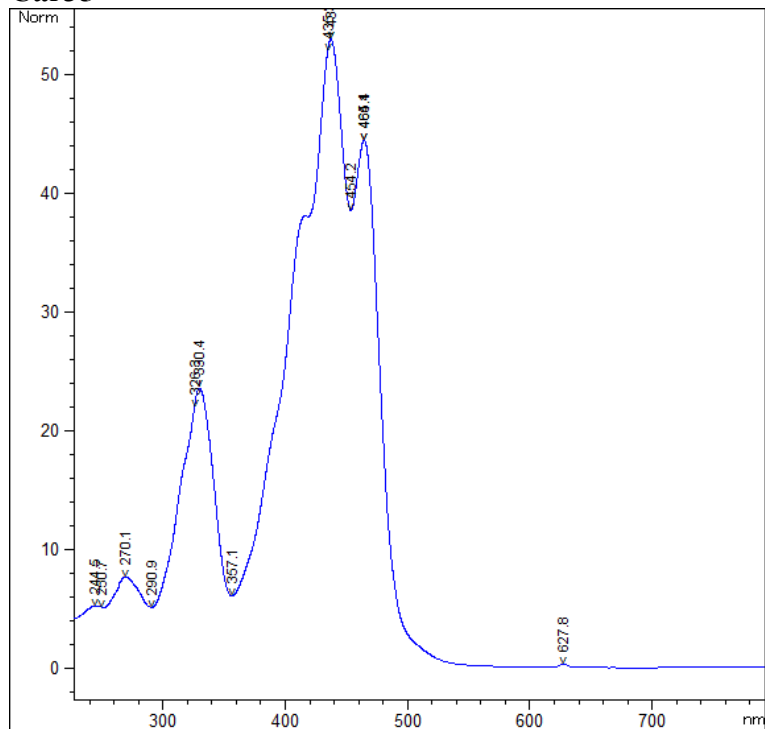

### Car36

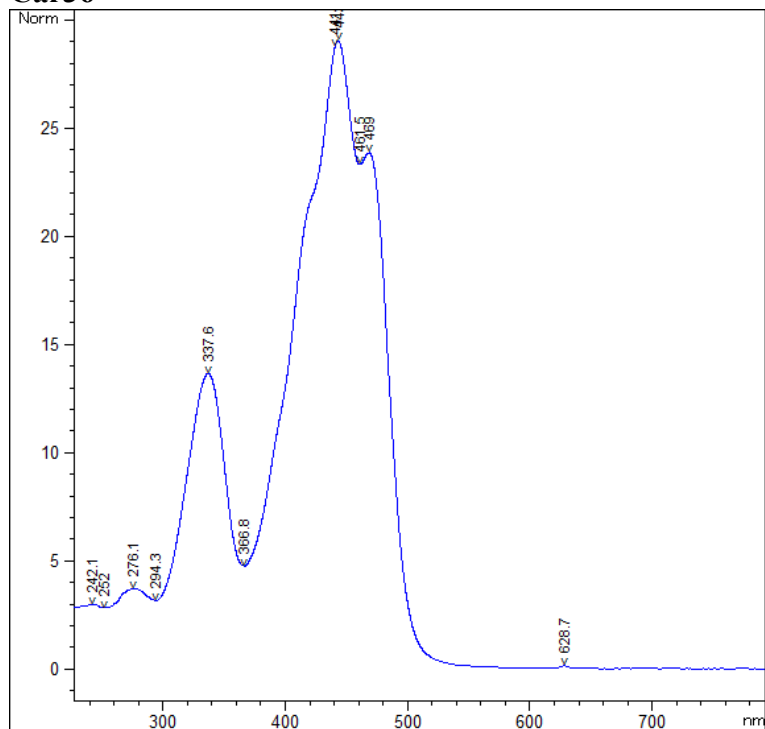

### Car37

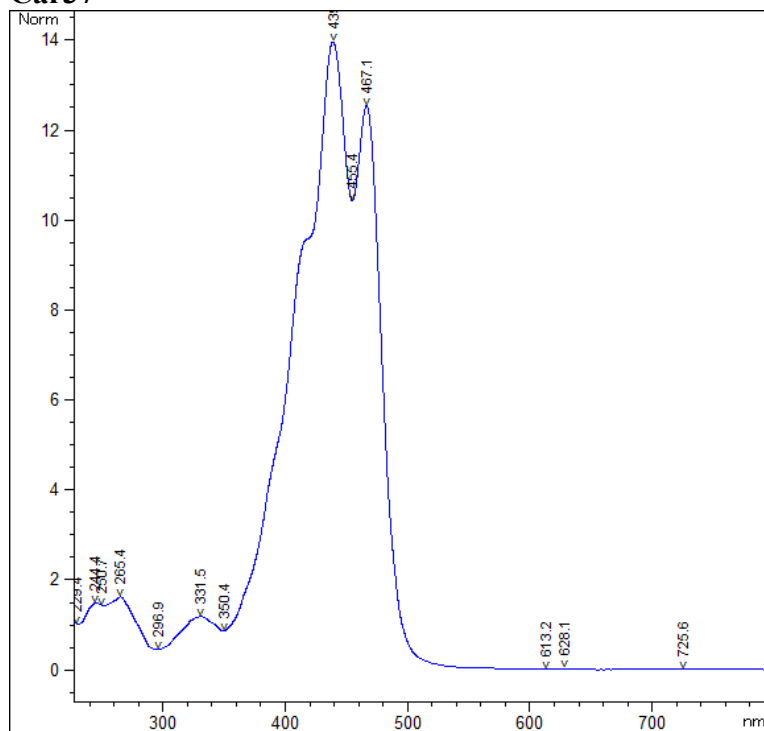

### Car38

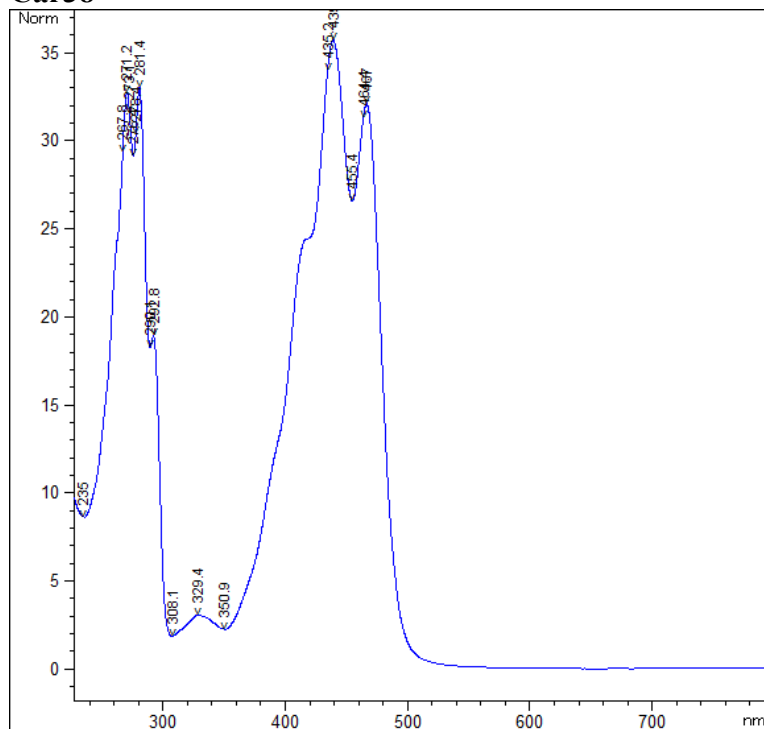



### Car39

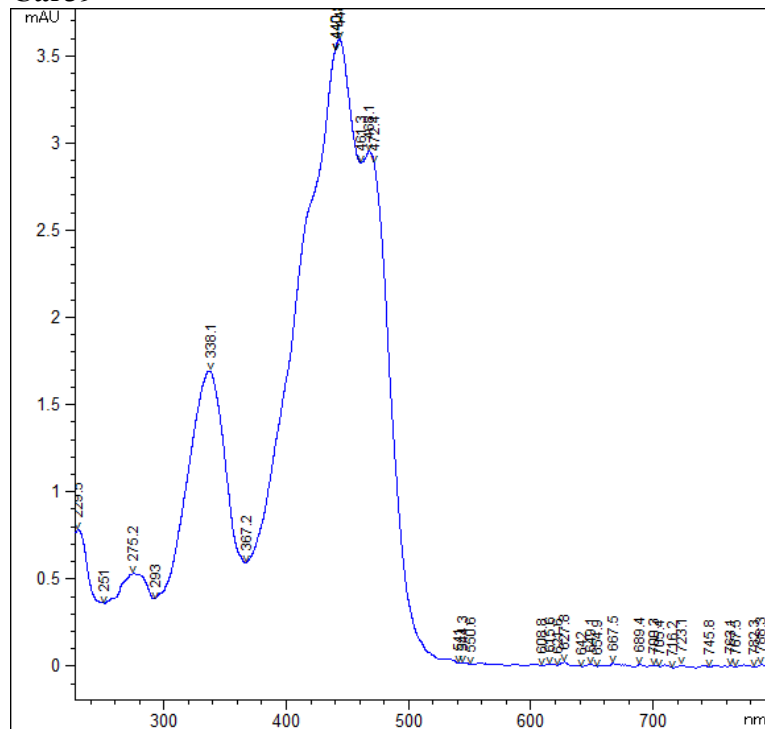

### Car40

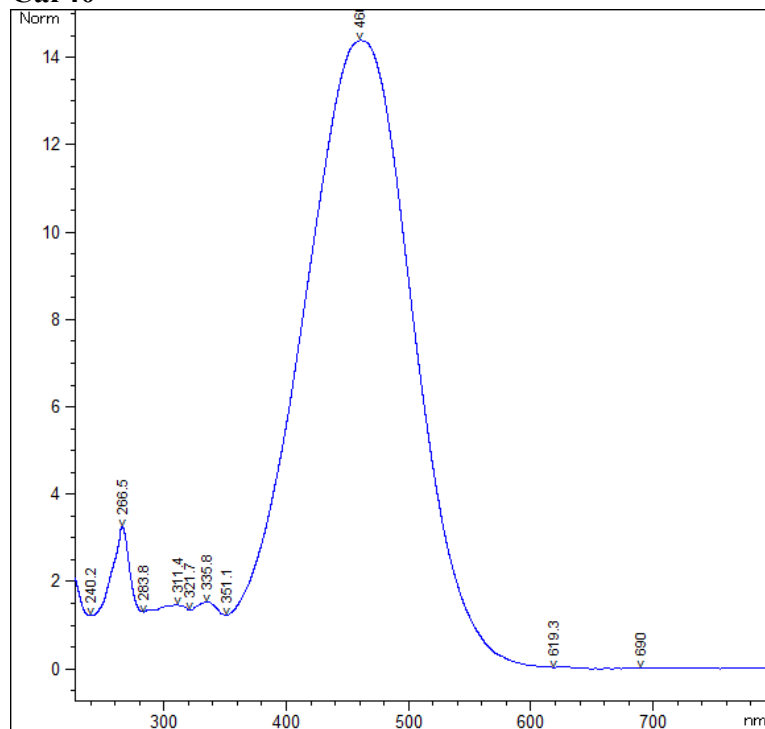

### Car41

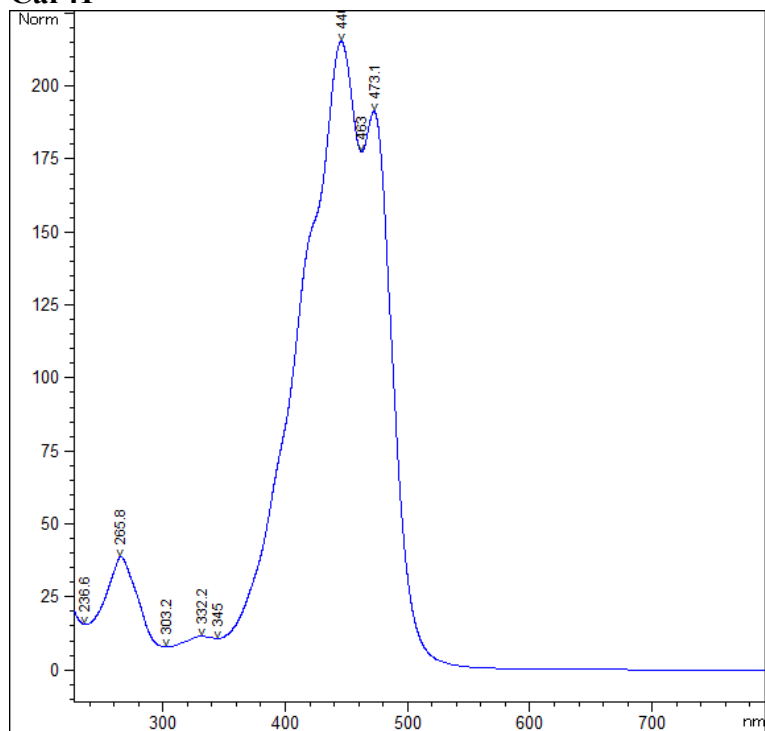

### Car42

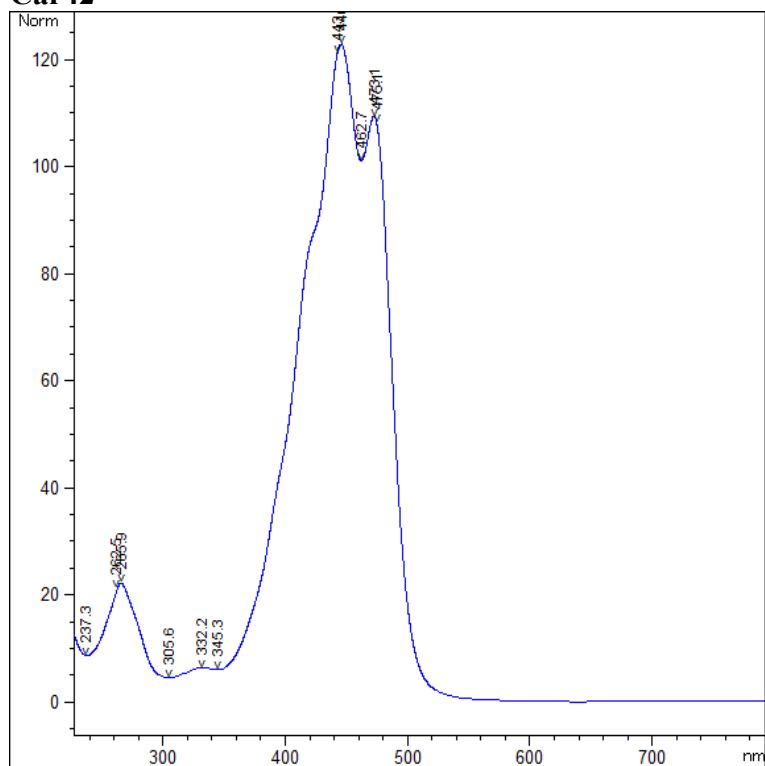

### Car43

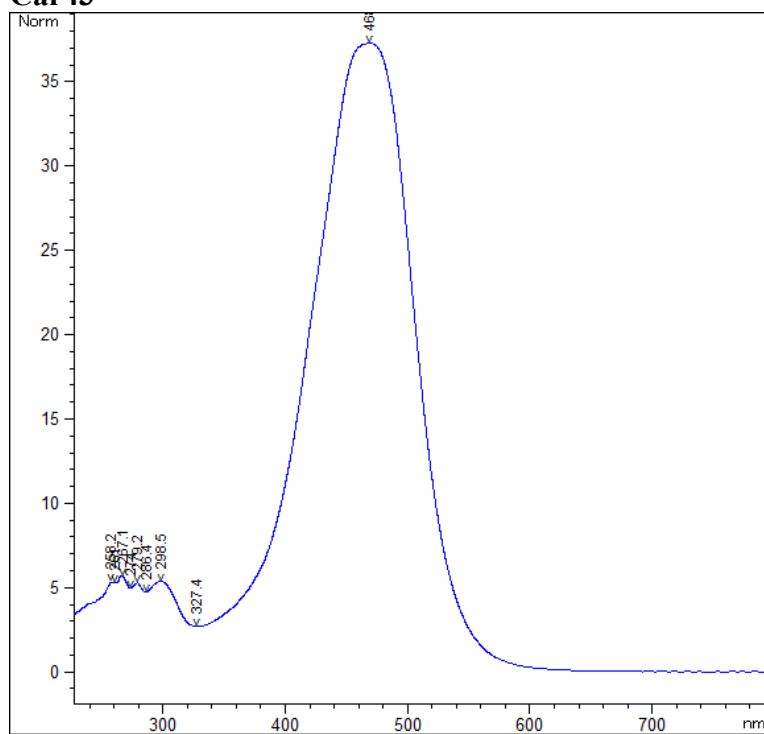

### Car44

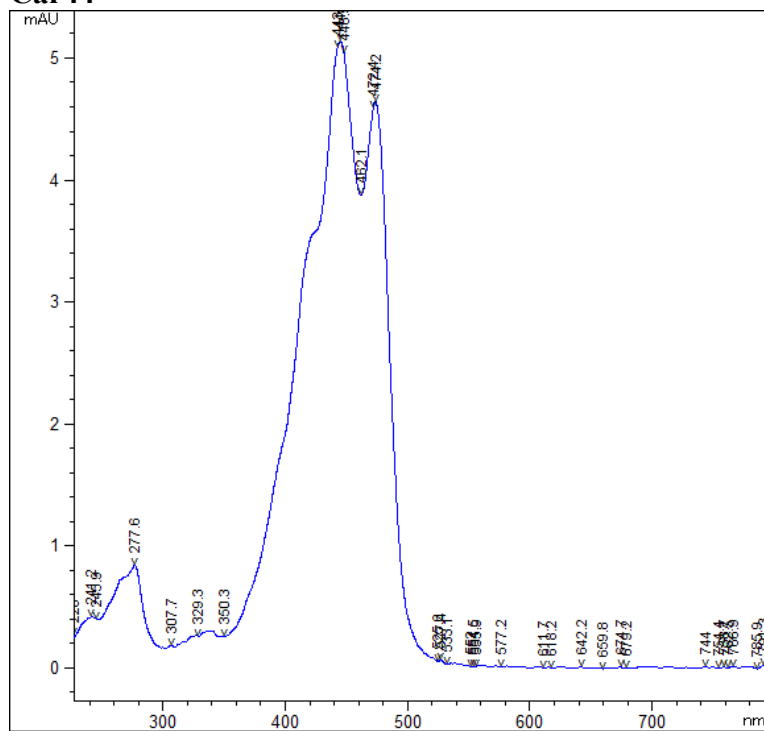

### Car45

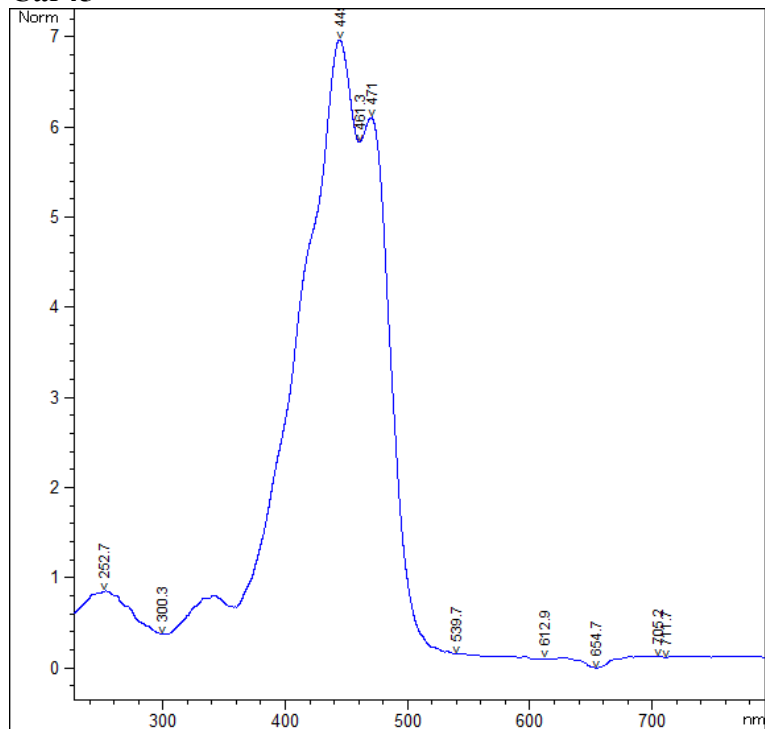

### Car46

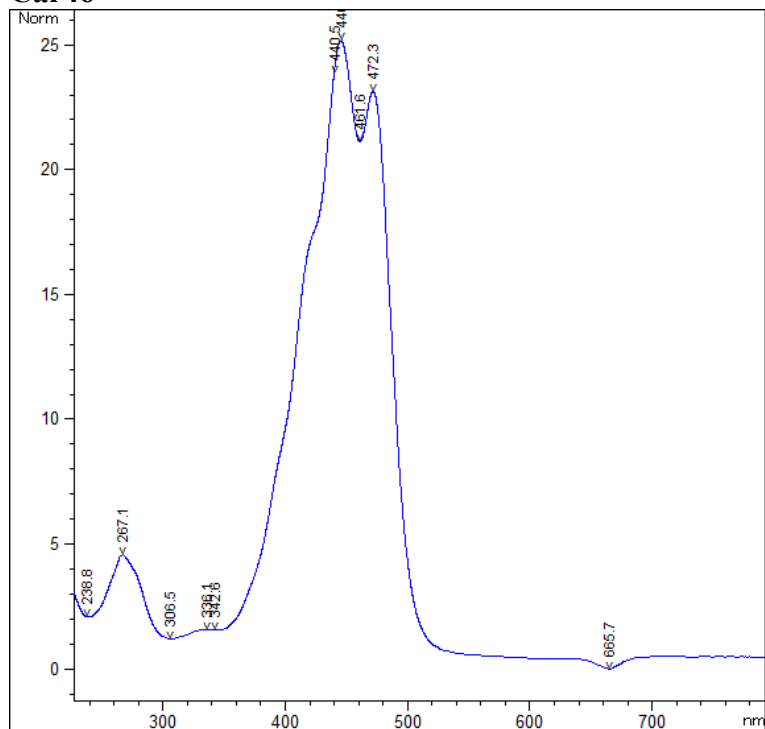

**Car47**

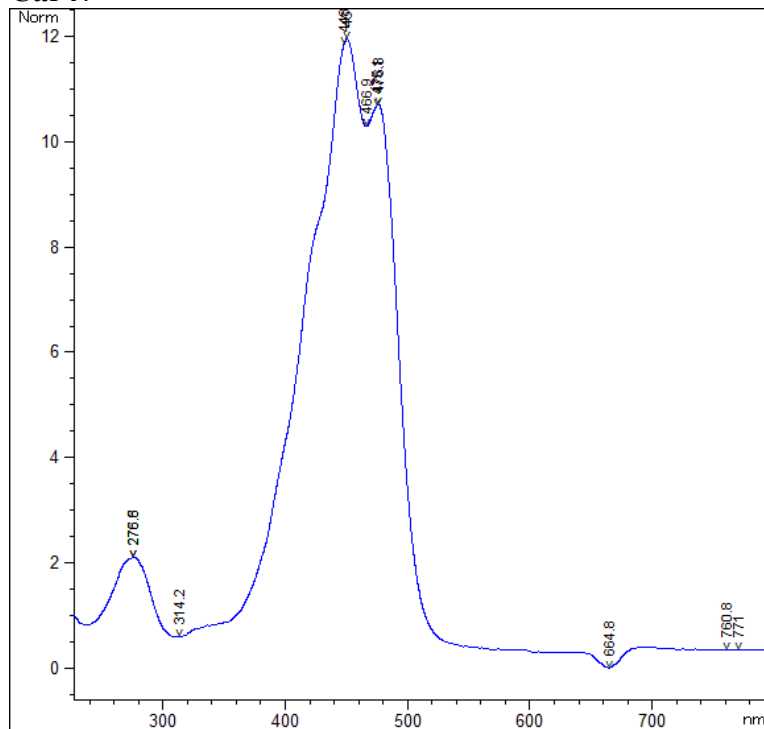

**Car48**

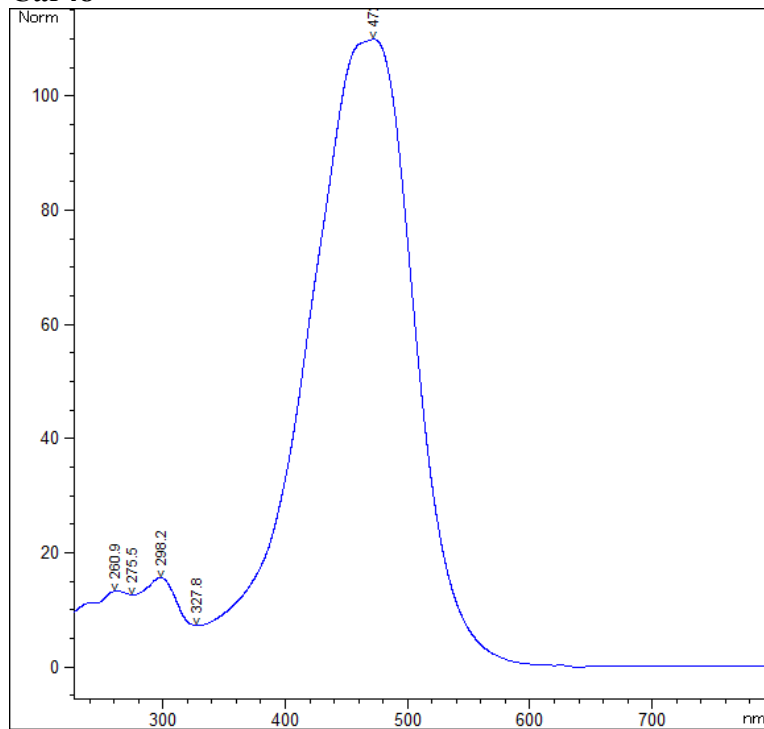

### Car49

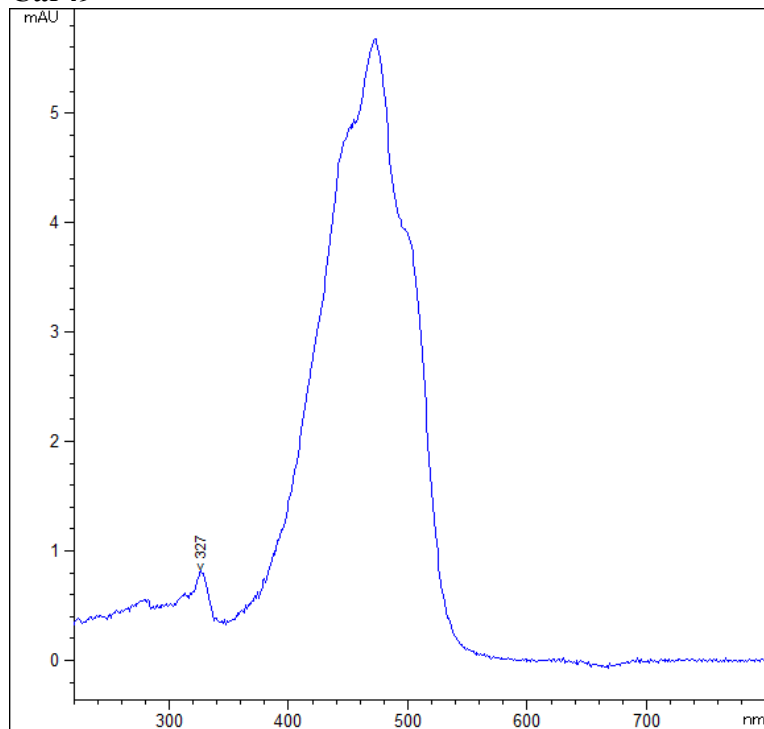

### Car50

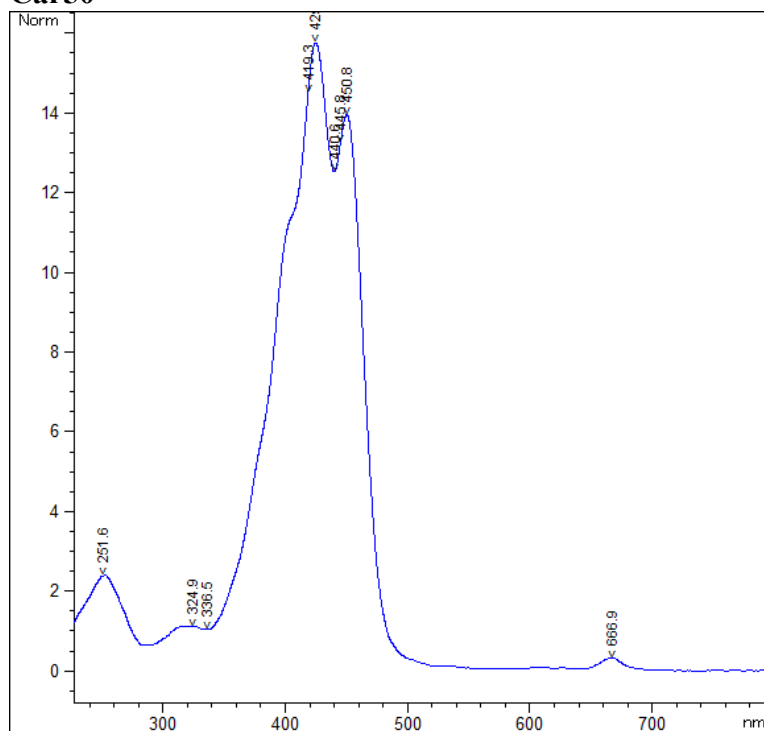

### Car51

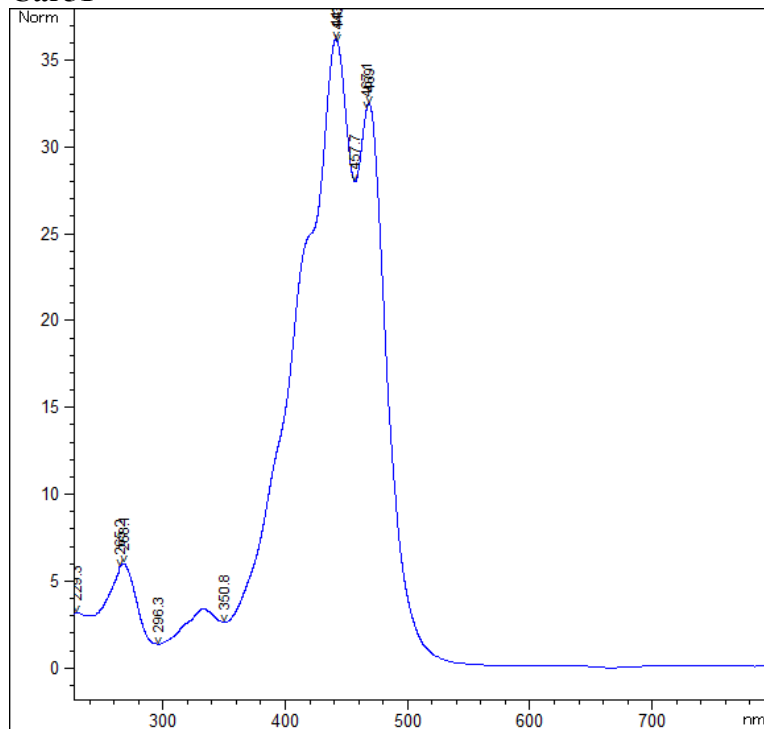

### Car52

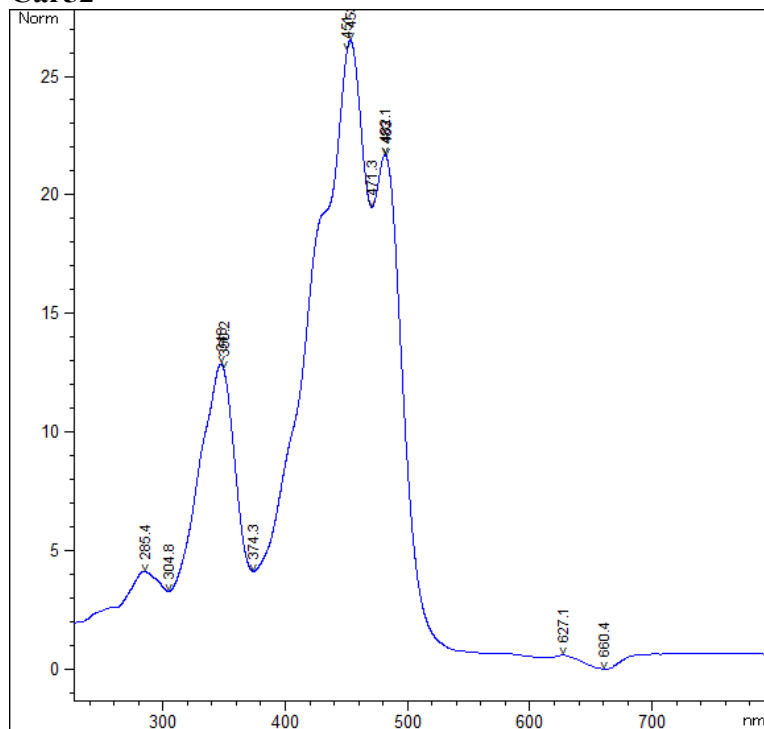

### Car53

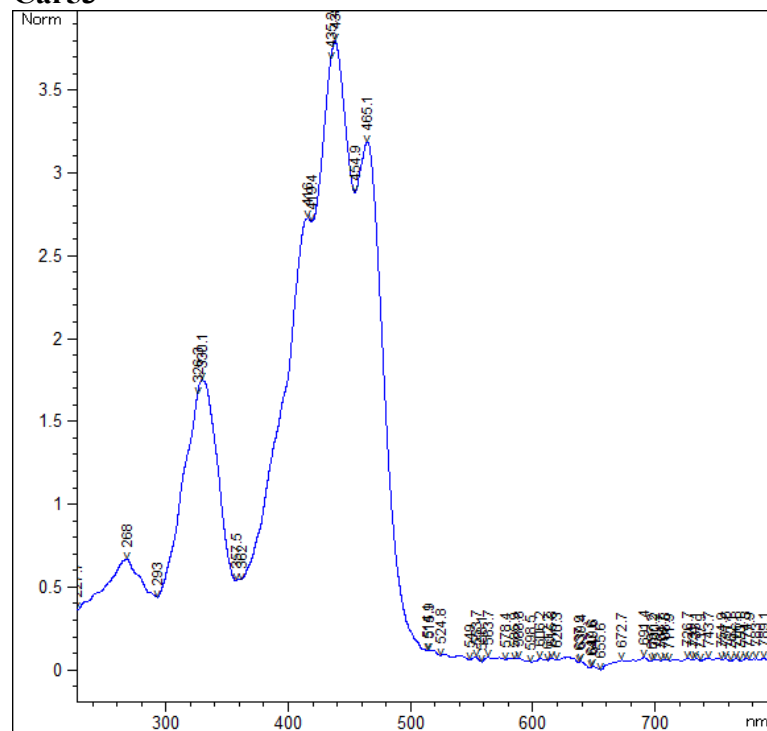

### Car54

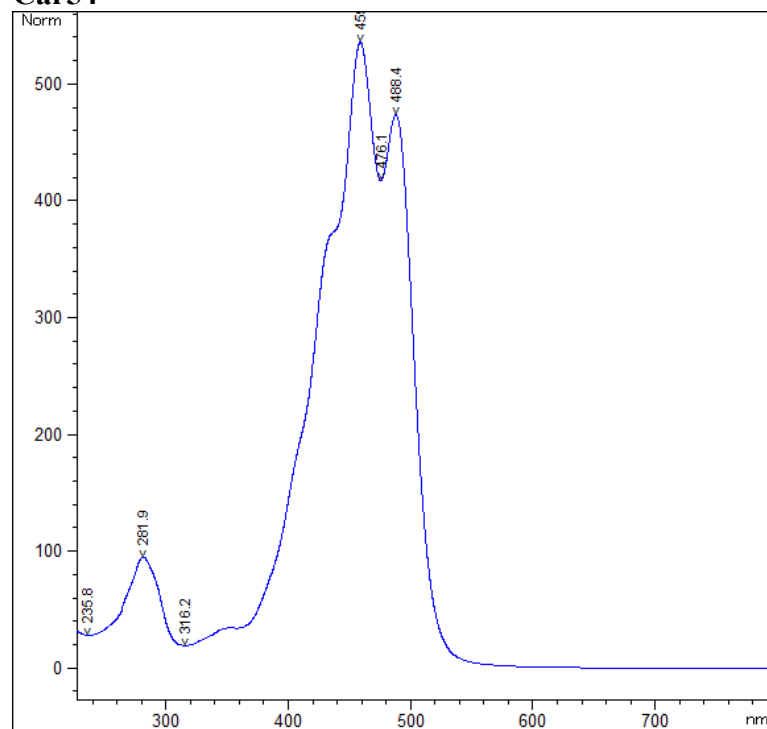



### Car55

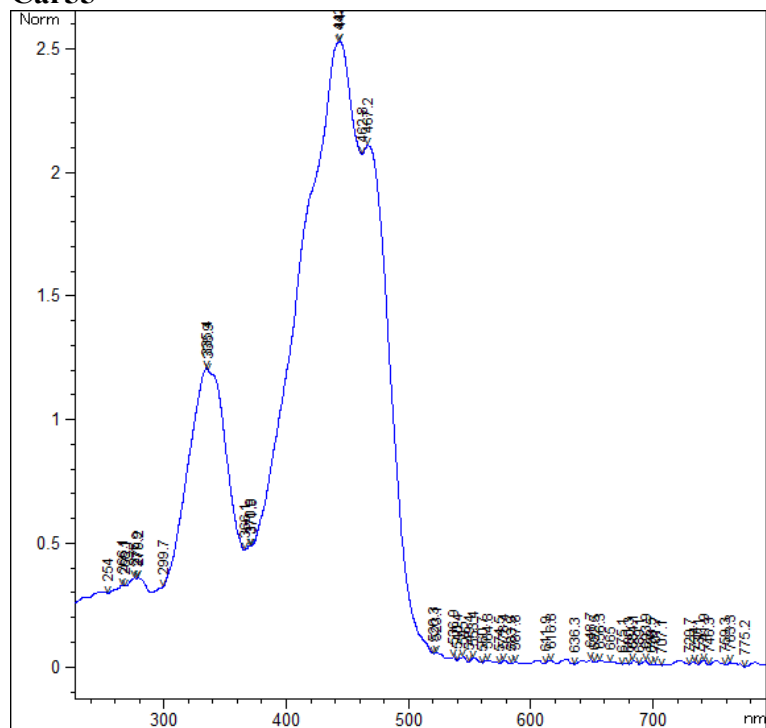

### Car56

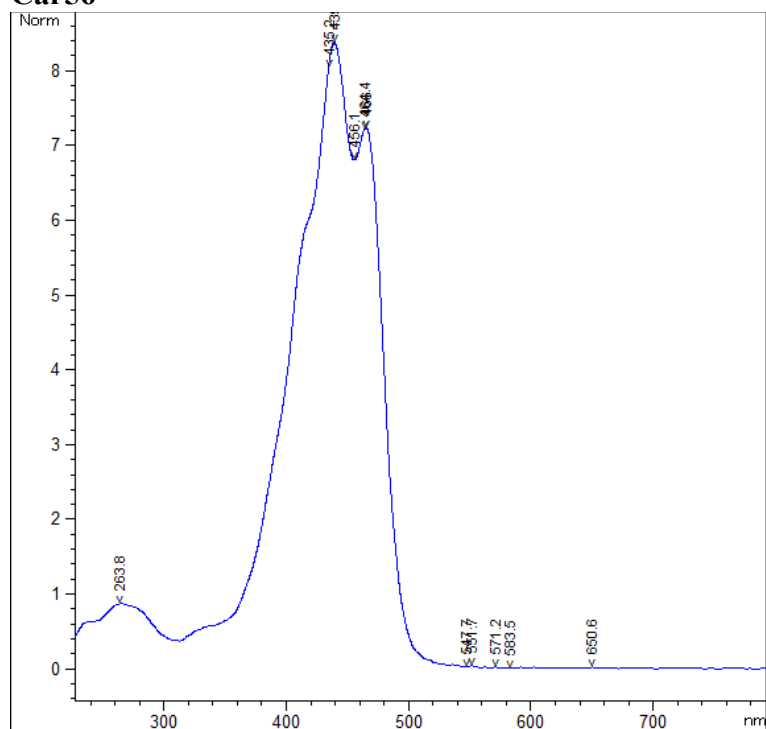

# Car57

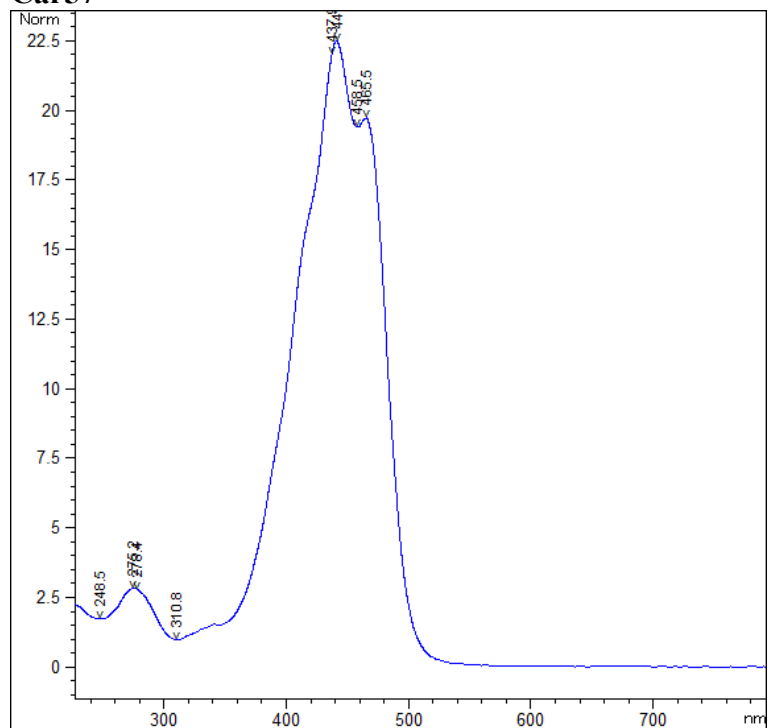

Supplement: pone.0171872.s003.pdf [file pone.0171872.s003.pdf]
