# Supplementary material for: Community analysis of pigment patterns from 37 microalgae strains reveals new carotenoids and porphyrins characteristic of distinct strains and taxonomic groups
Source: PubMed Central journal article supplement (PMC5322898; doi:10.1371/journal.pone.0171872), 2017-02-23
Supplement: pone.0171872.s001.pdf [file pone.0171872.s001.pdf]

# Supporting Information

**S1.A Fig. Calculation of carotenoid band ratio.**

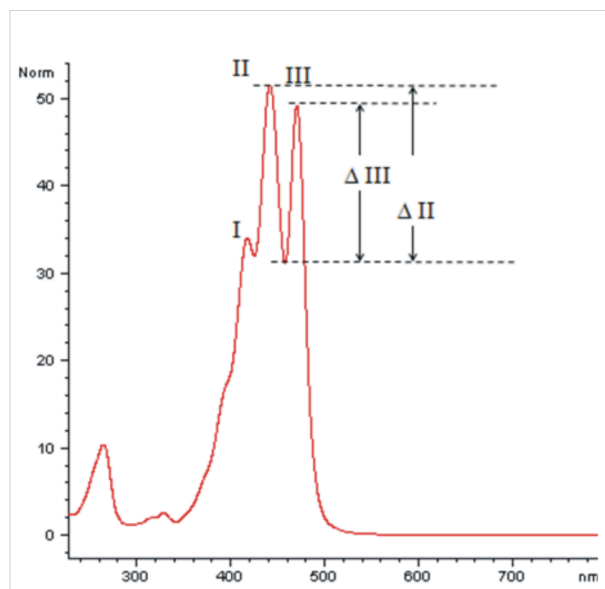

UV-visible spectra showing wavelength I; II and III of a carotenoid. Band ratio corresponds to the % ratio  $\Delta \text{III} / \Delta \text{II}$ .

**S1.B Fig. Calculation of porphyrin band ratio.**

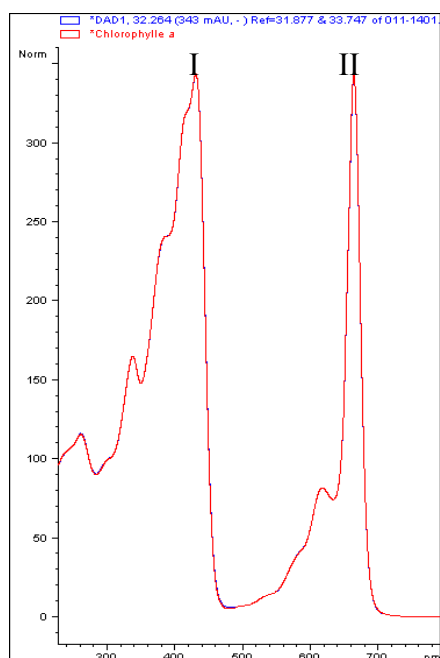

UV-visible spectra showing the location of I the Soret (blue maximum) and II the red bands of Chlorophyll -a.
