# Supplementary material for: Community analysis of pigment patterns from 37 microalgae strains reveals new carotenoids and porphyrins characteristic of distinct strains and taxonomic groups
Source: PubMed Central journal article supplement (PMC5322898; doi:10.1371/journal.pone.0171872), 2017-02-23
Supplement: pone.0171872.s002.pdf [file pone.0171872.s002.pdf]

# Supporting Information

**S3 Figs. Chromatograms at 436 nm of all carotenoid and chlorophyll pigments detected in the 37 analysed strains.** Ancillary pigments are annotated according to Table 2.

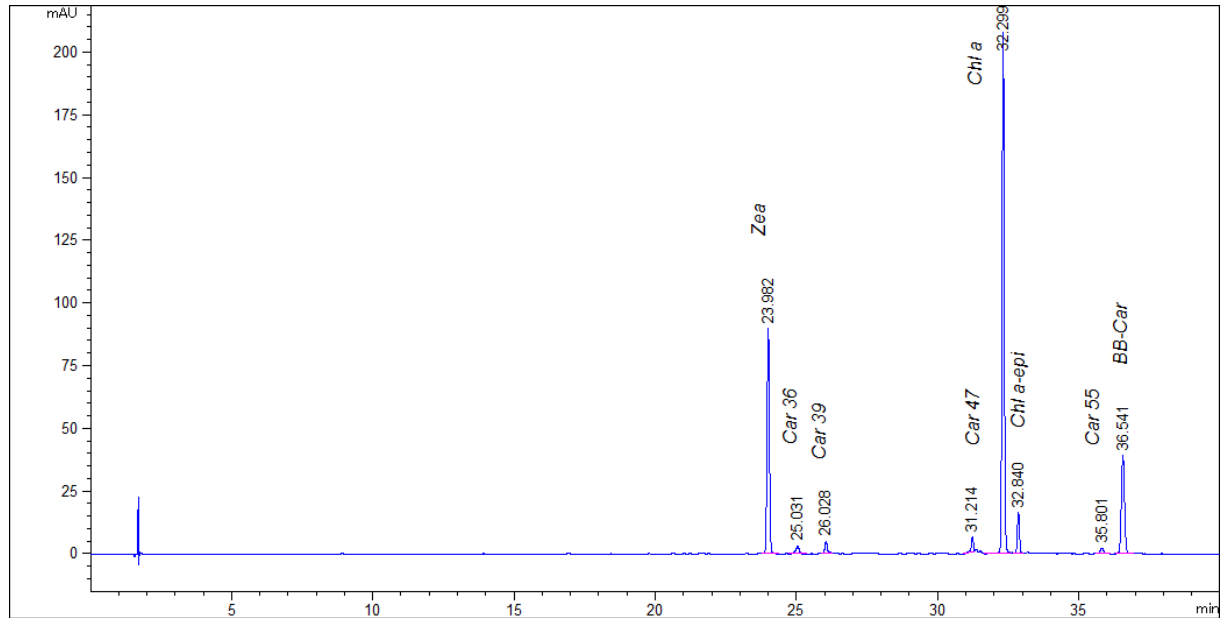

*Porphyridium purpureum* SAG 1380-d

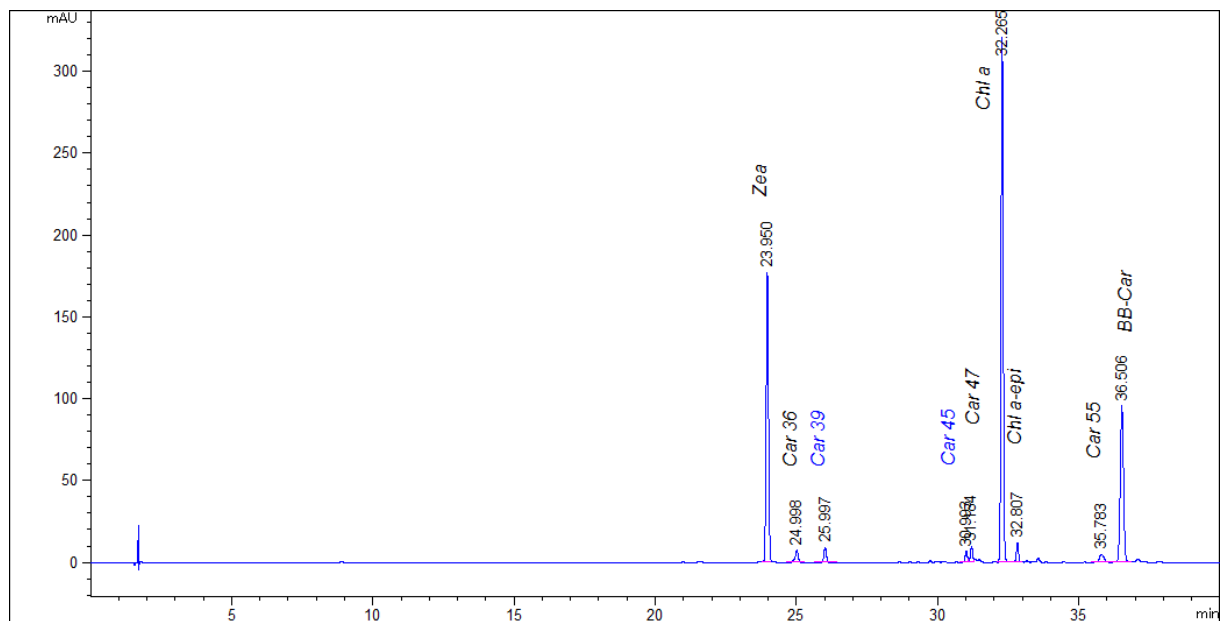

*Rhodella violacea* SAG 115.79

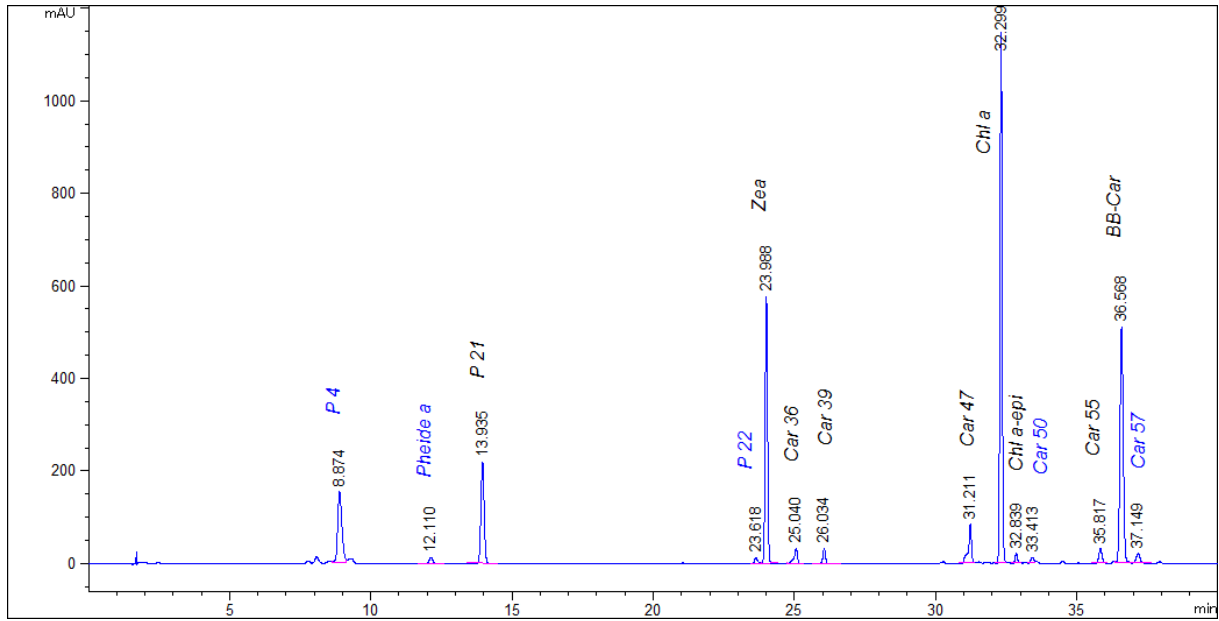

*Galdieria sulphuraria*

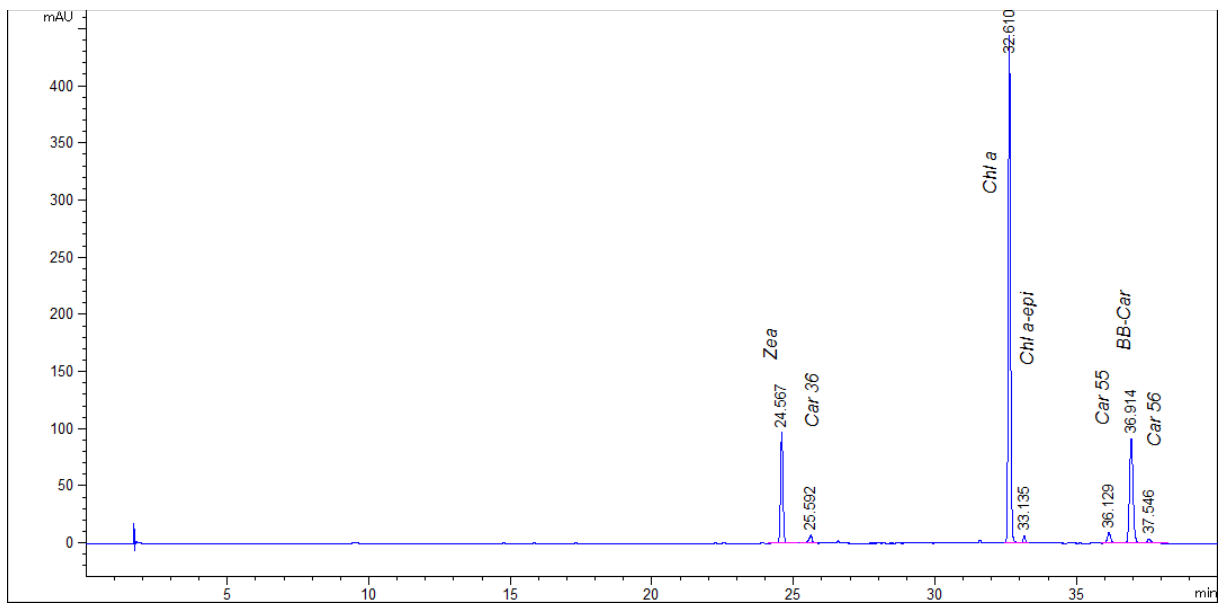

*Cyanophora paradoxa* SAG 29.80

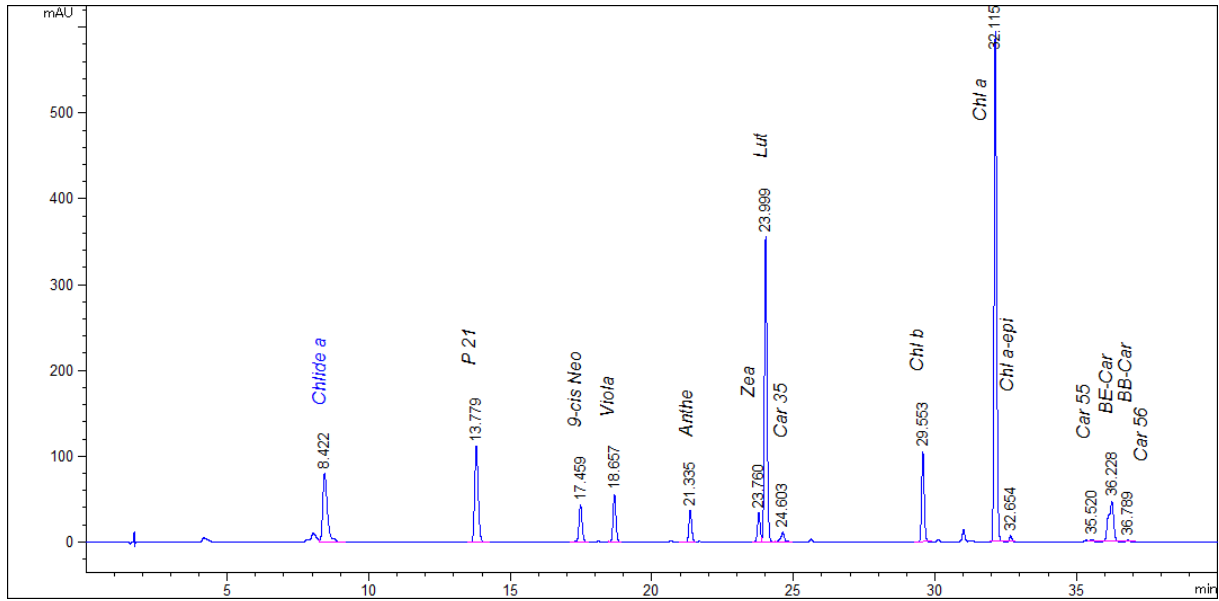

*Closterium baillyanum* SAG 50.89

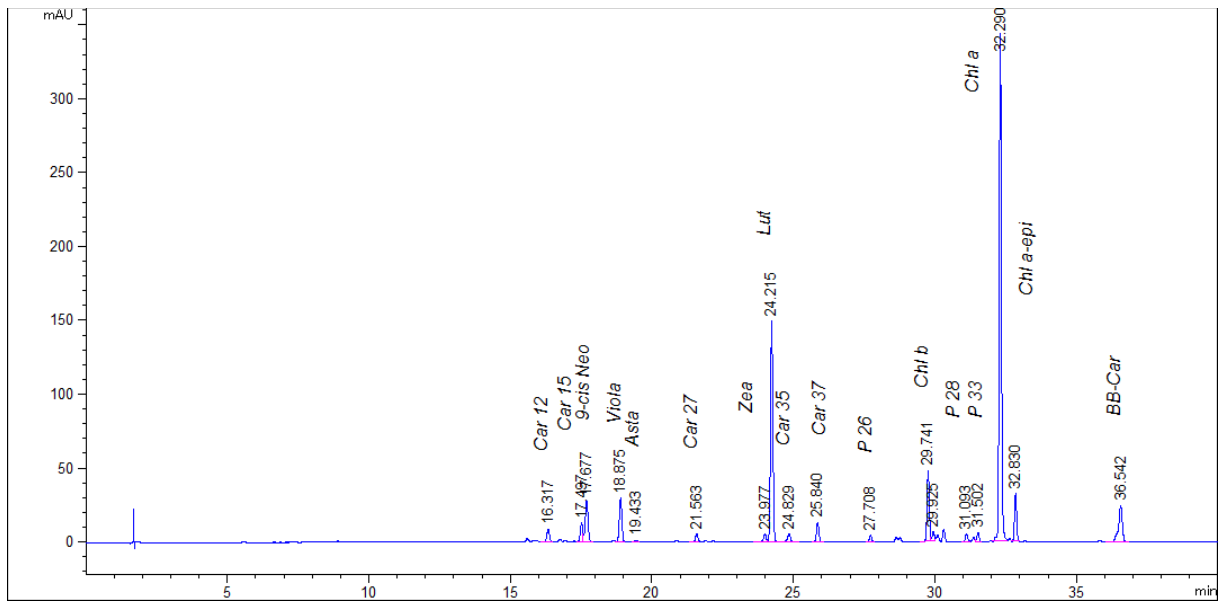

*Scenedesmus acutus* f. *alternans* UTEX 72

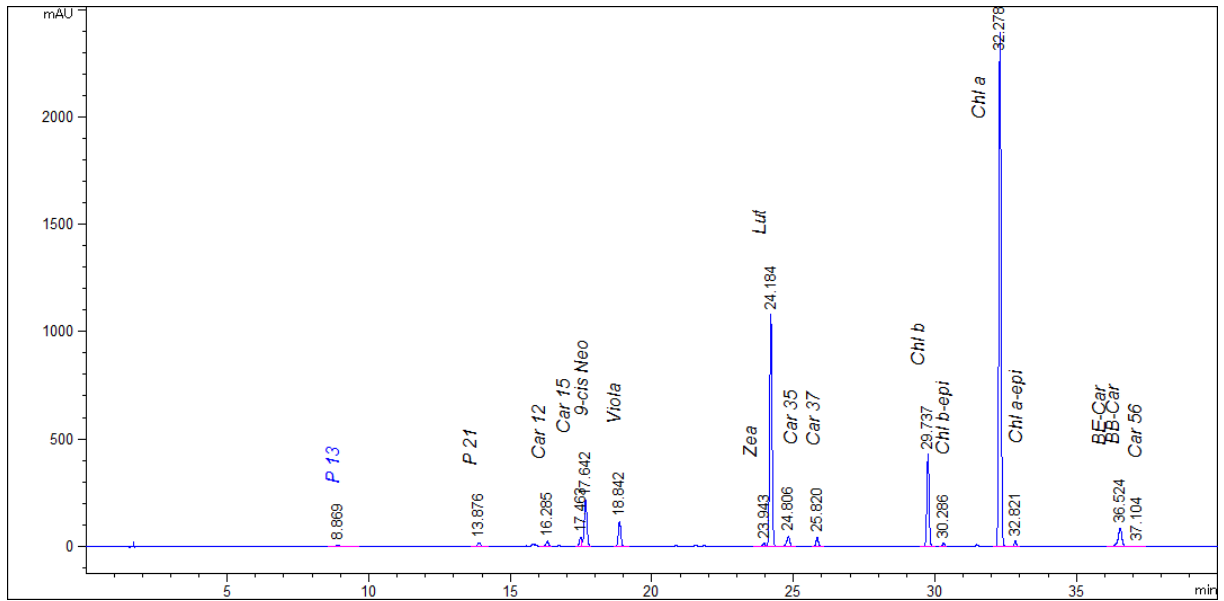

*Scenedesmus obliquus* UTEX 1450

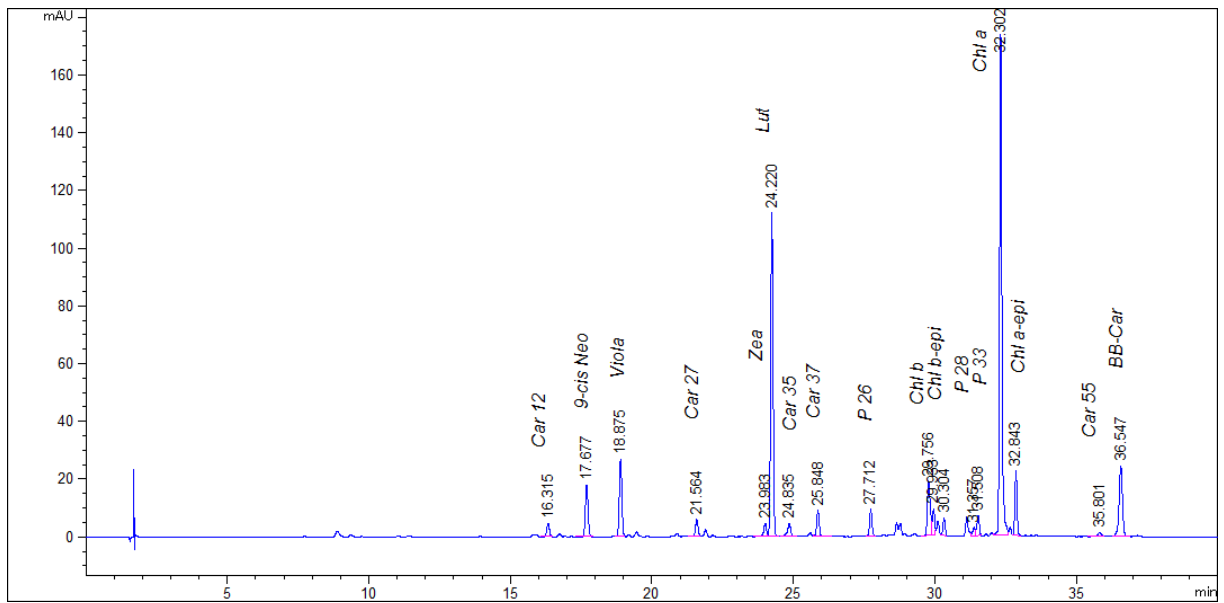

*Haematococcus pluvialis* CCAP 34/7

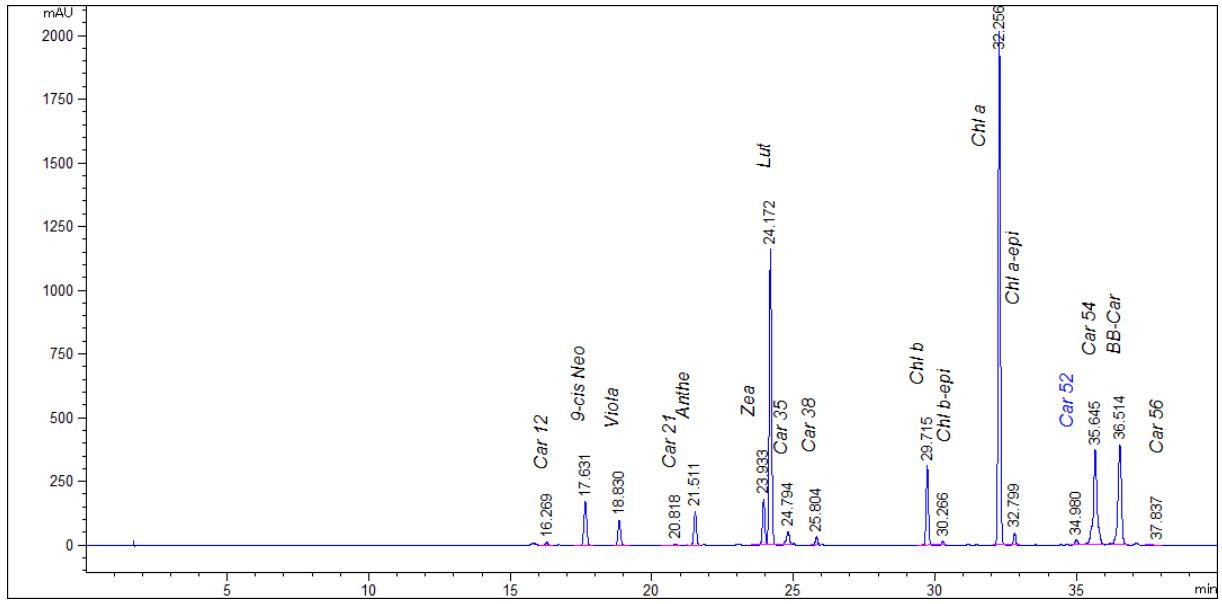

*Dunaliella* sp. CCAP 19/19

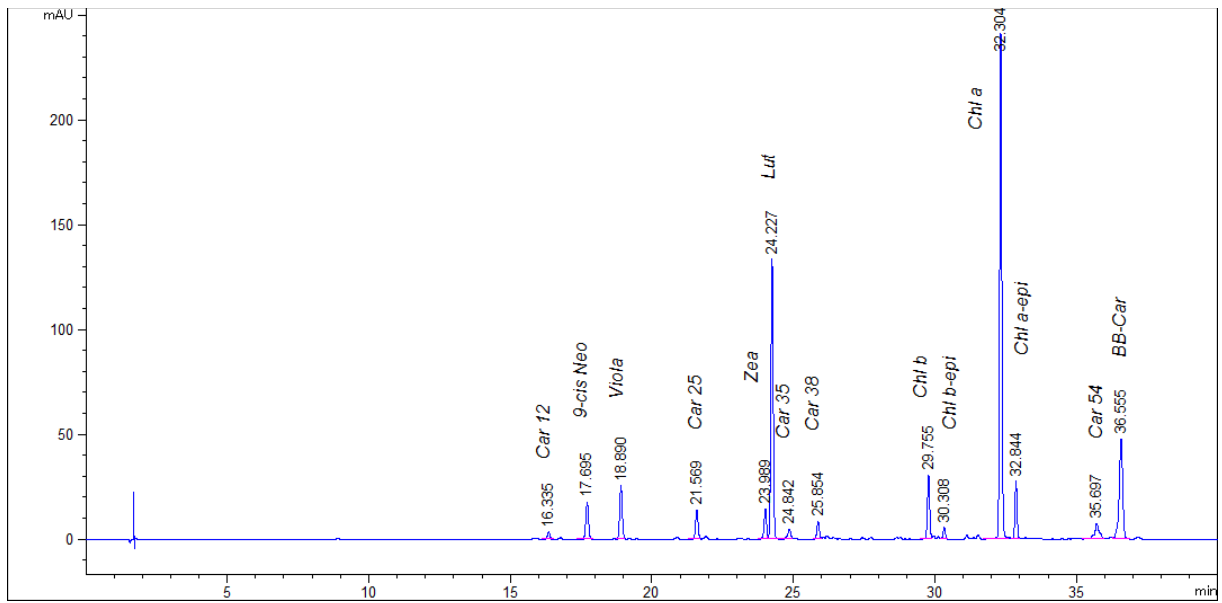

*Dunaliella salina* SAG 19-3

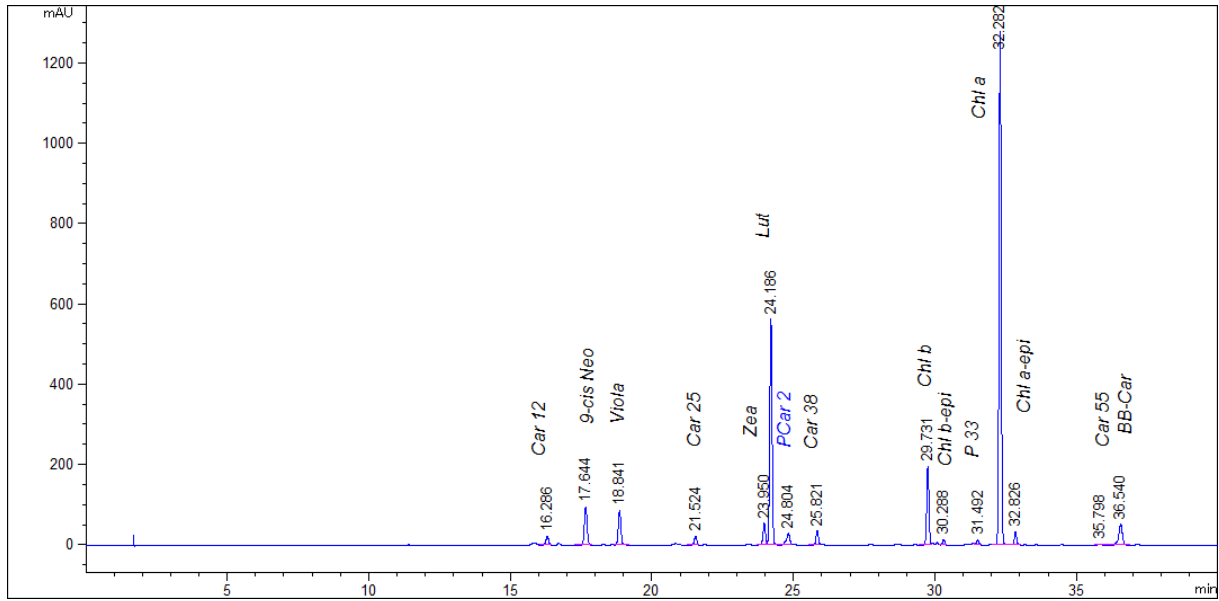

*Chlorella autotrophica* CCMP 243

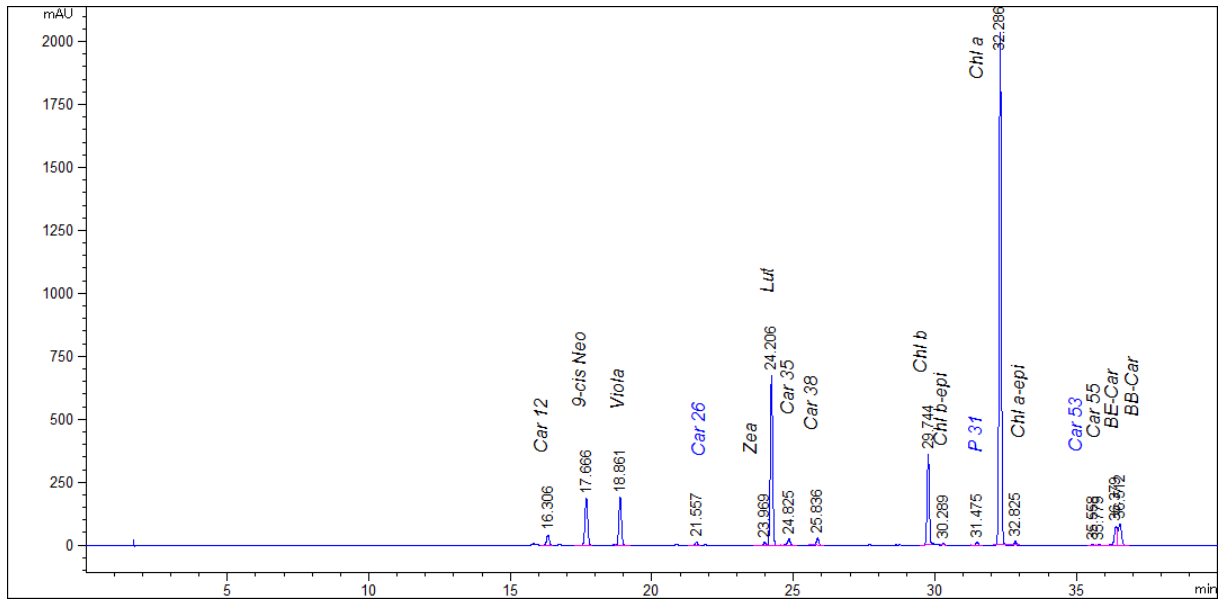

*Chlorella vulgaris* SAG 2.80

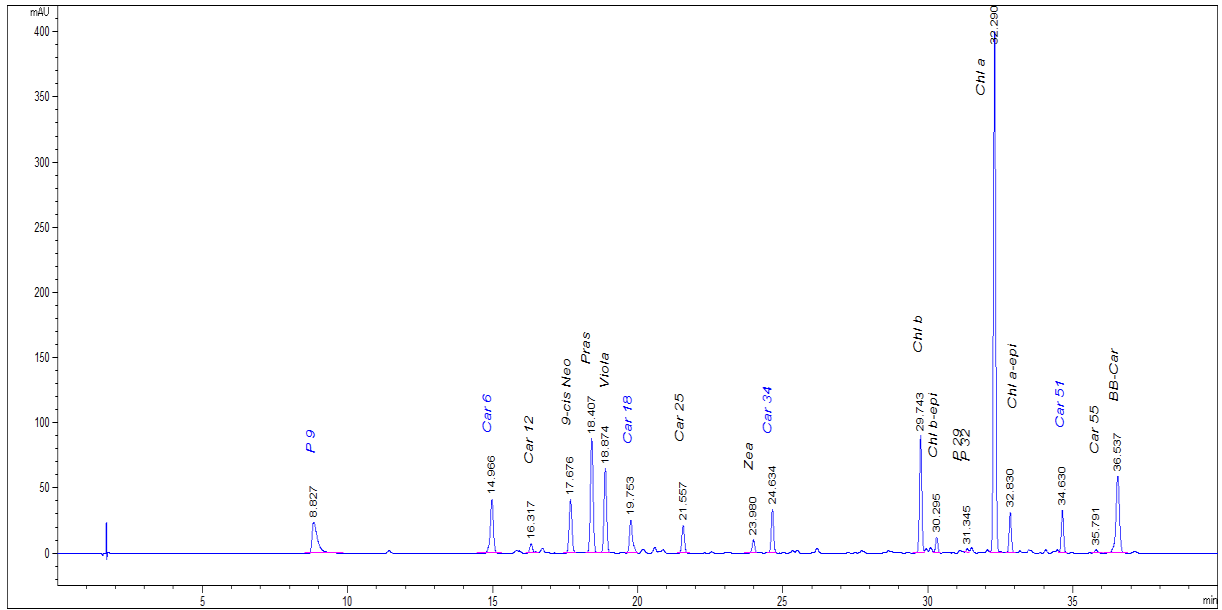

*Ostreococcus tauri* H95

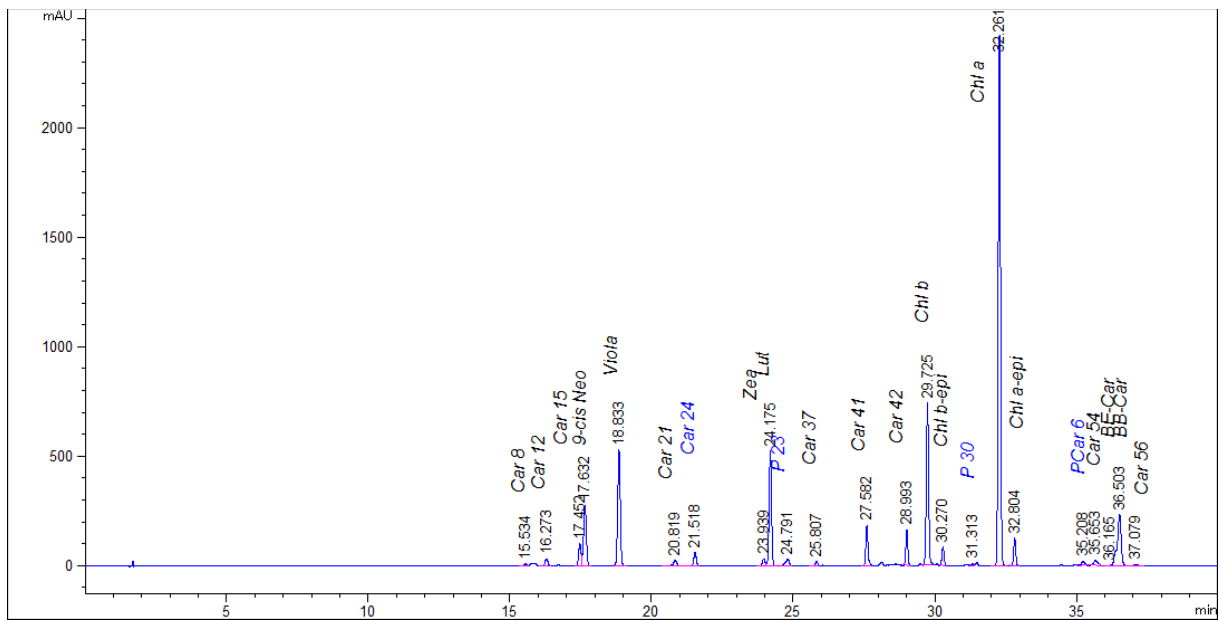

*Tetraselmis suecica* CCMP 904

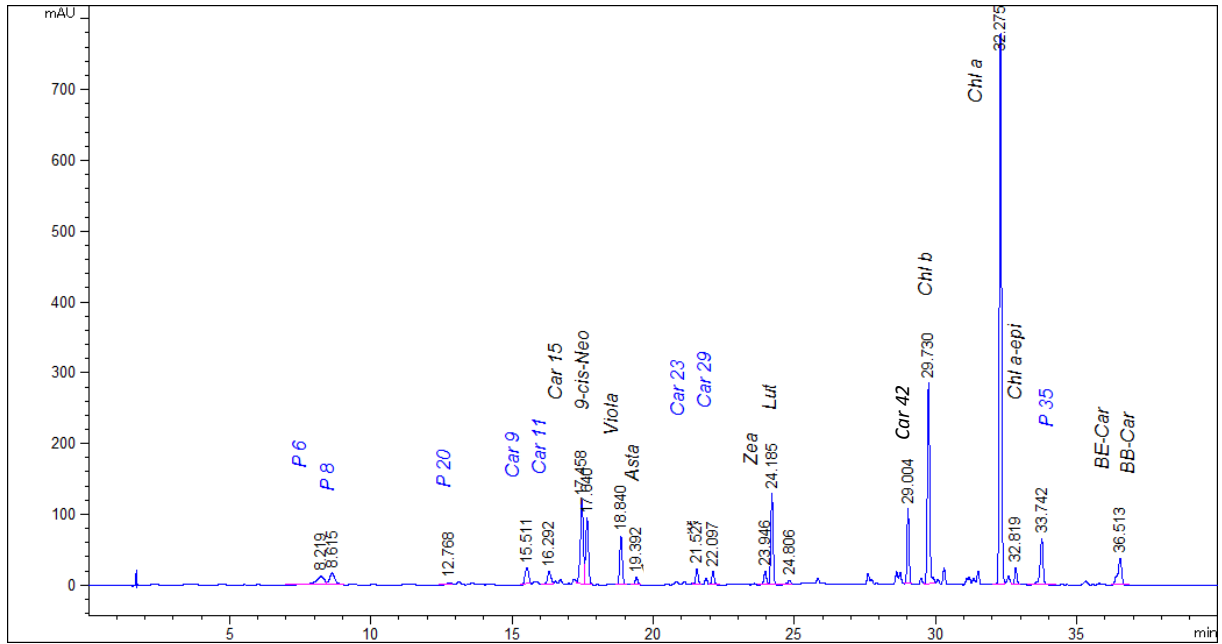

*Chlorarachnion reptans* SAG 26.97 (fed with *Nitzschia curvilineata*.)

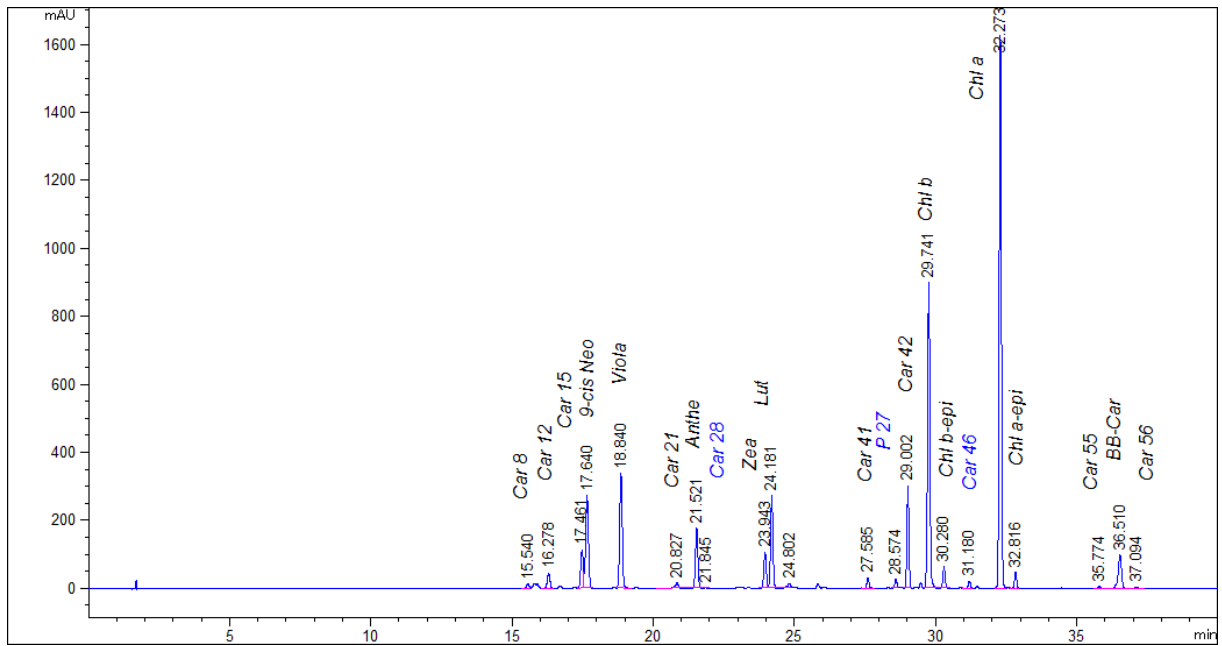

*Bigelowiella natans* CCMP 621



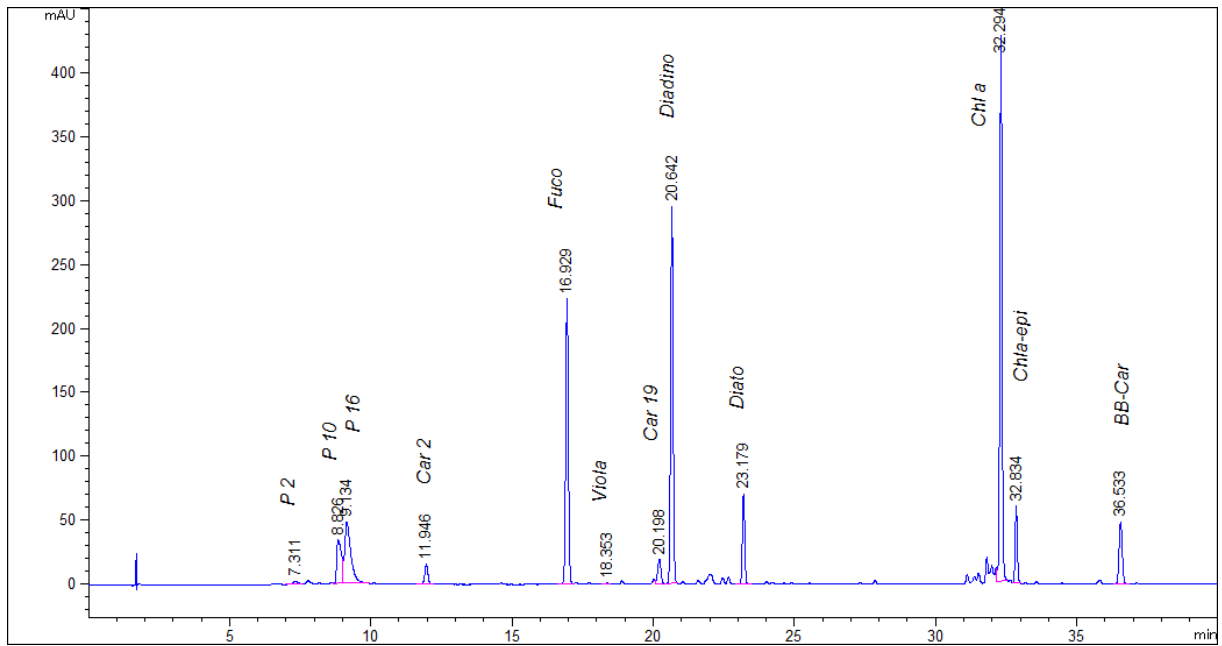

*Isochrysis galbana* SAG 13.92

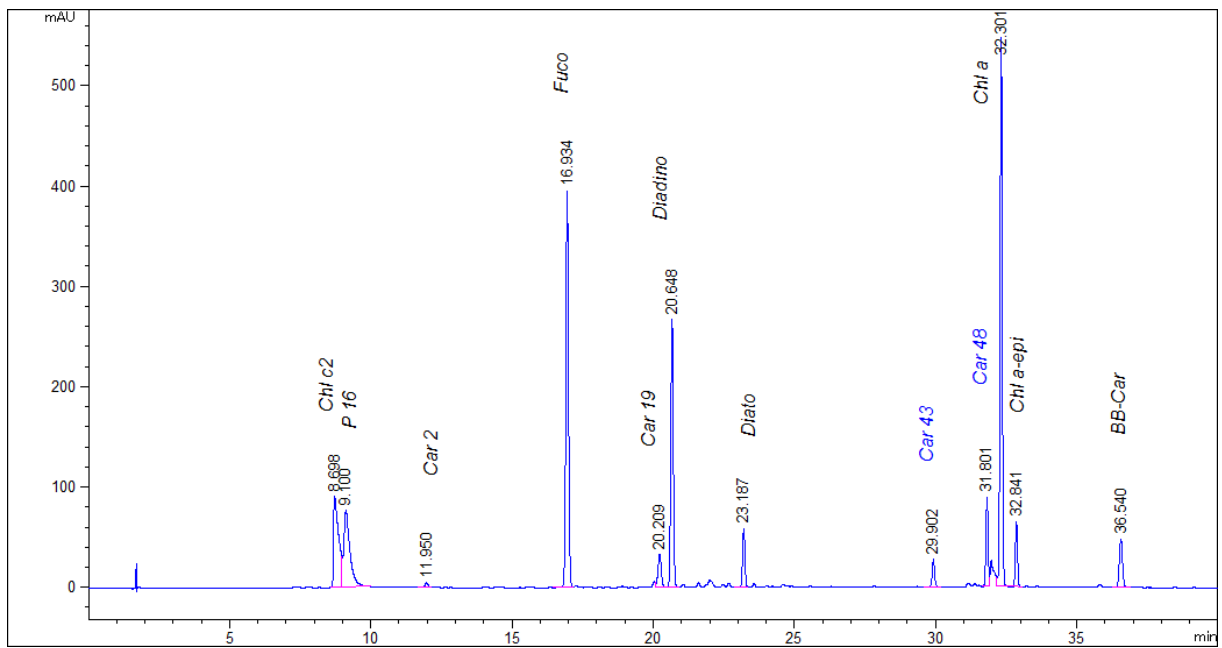

*Tisochrysis lutea* CCAP927/114

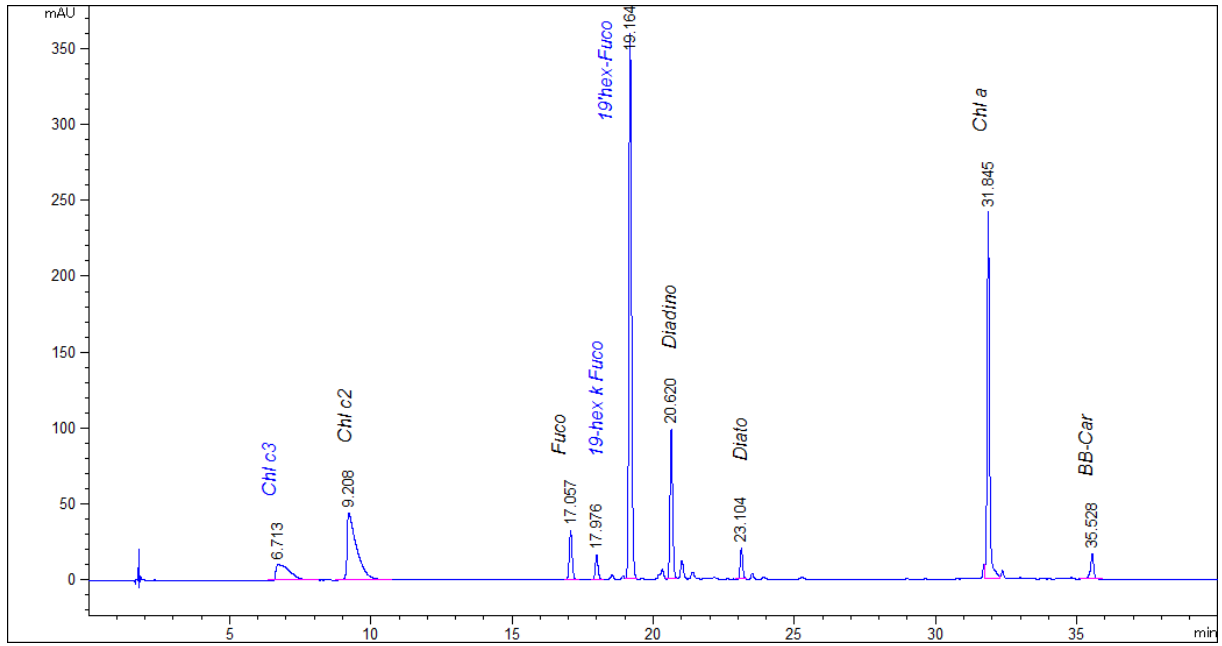

*Emiliana huxleyi* SAG 33.90

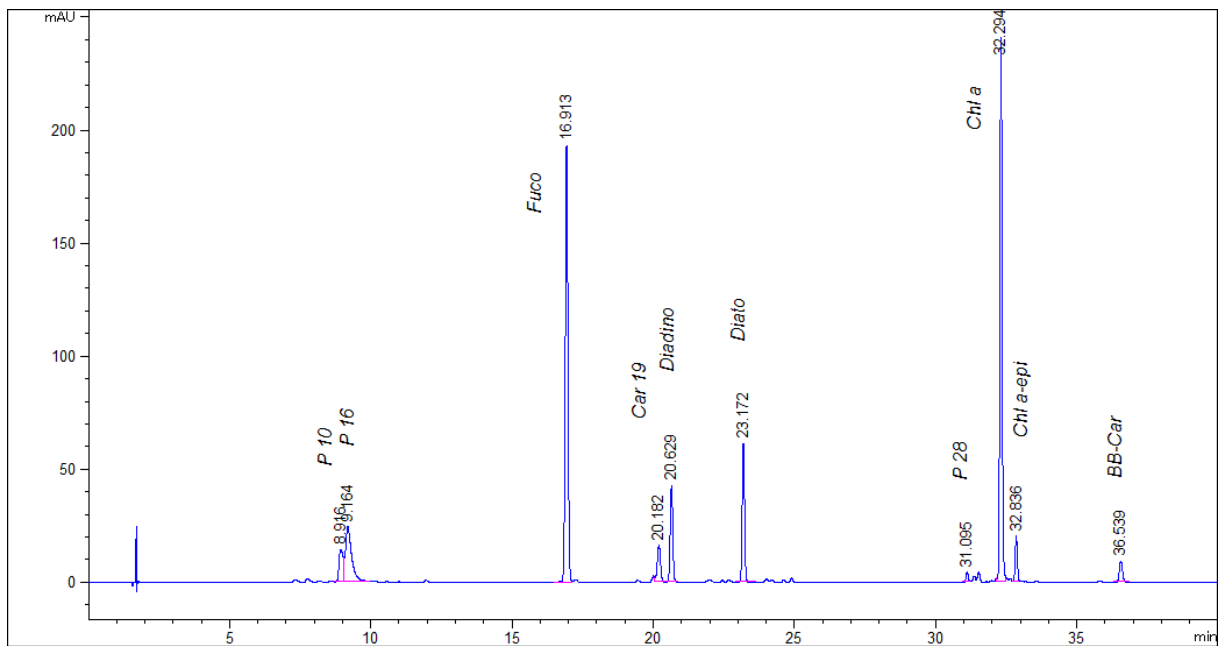

*Thalassiosira pseudonana* SAG 1224-11a

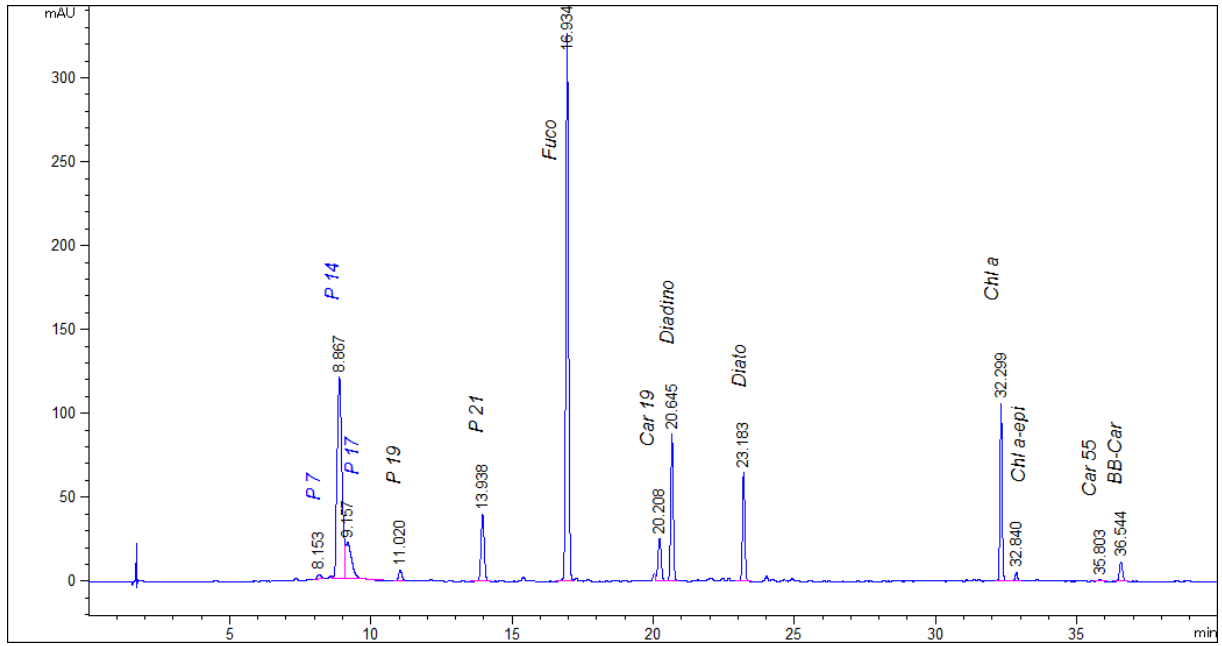

*Skeletonema grethae* CCAP 1077/4

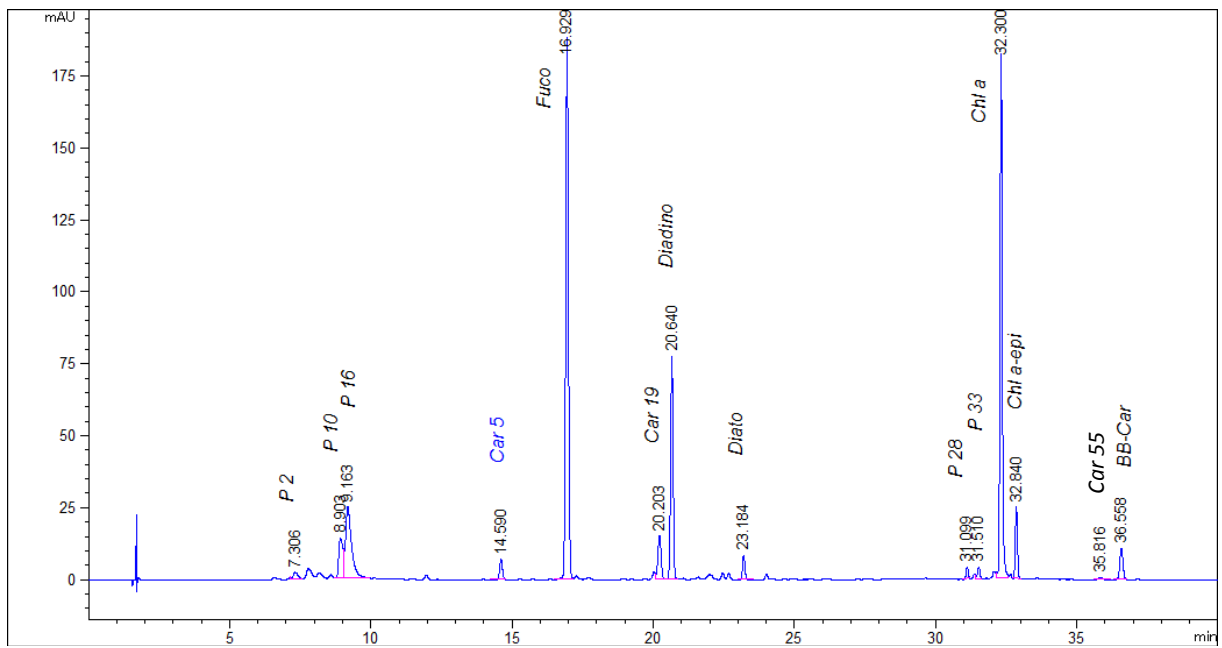

*Odontella aurita* 123

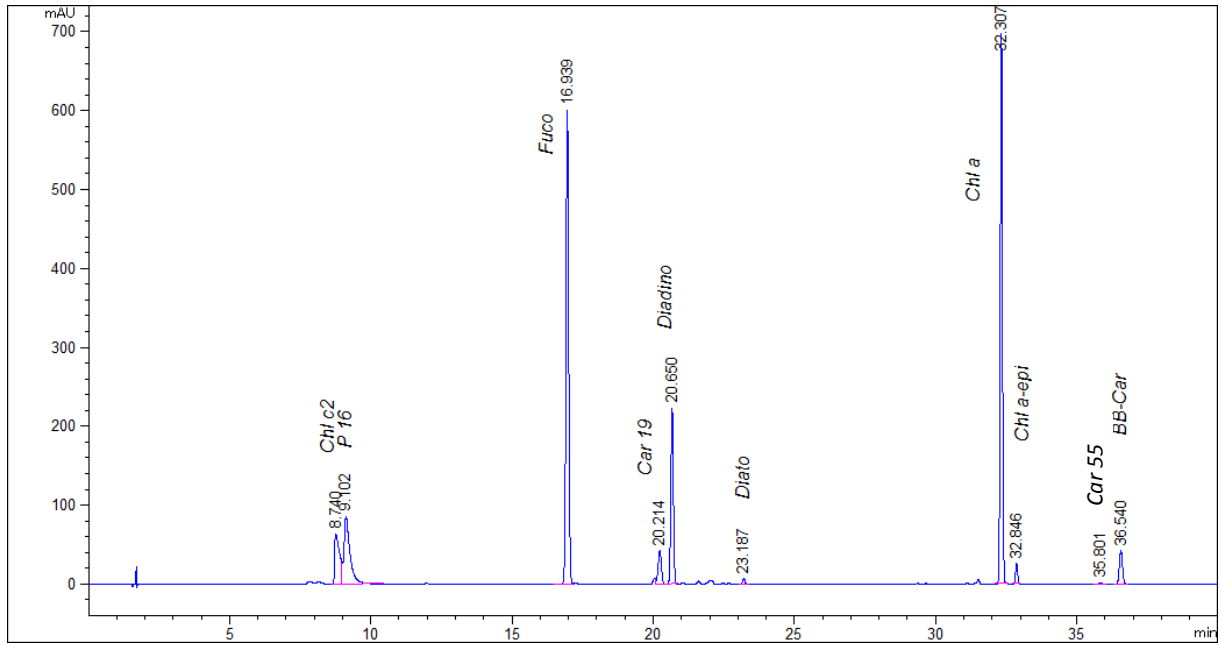

*Odontella aurita* 122

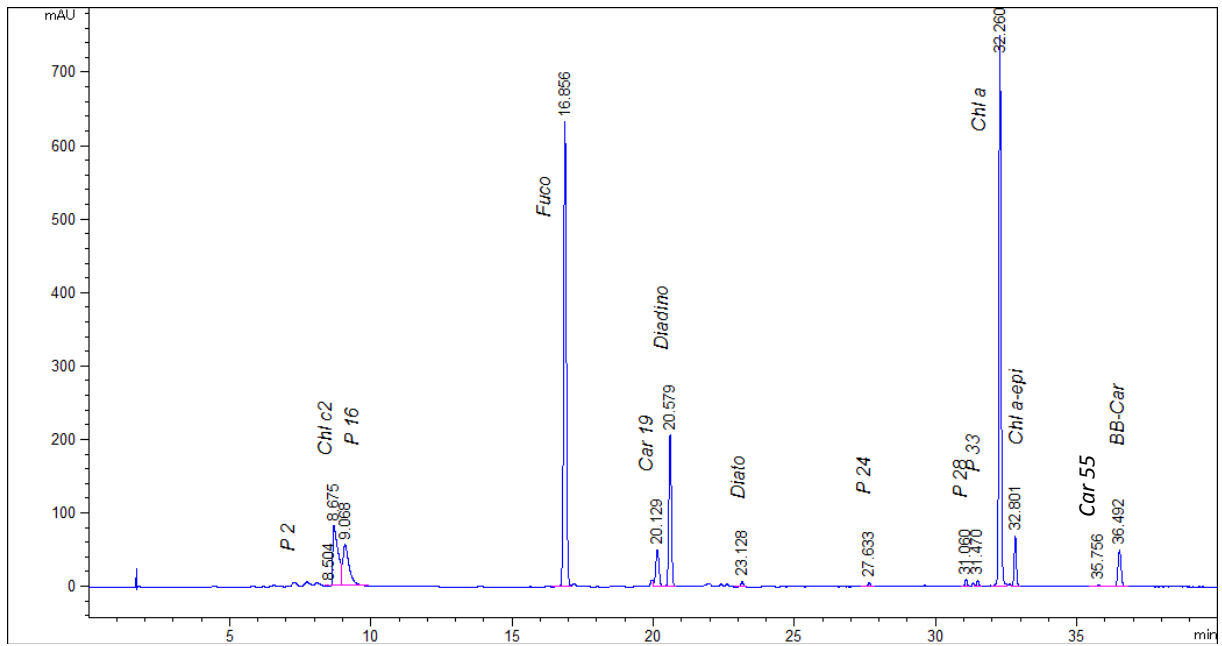

*Chaetoceros mulleri*

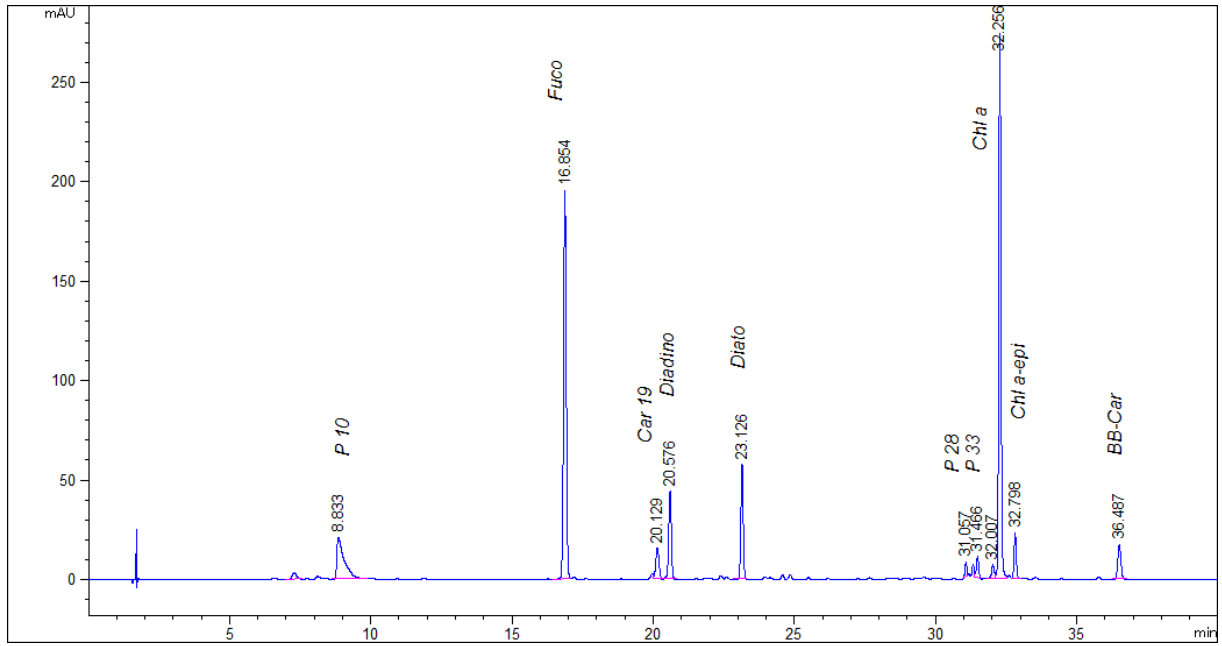

*Chaetoceros minus*

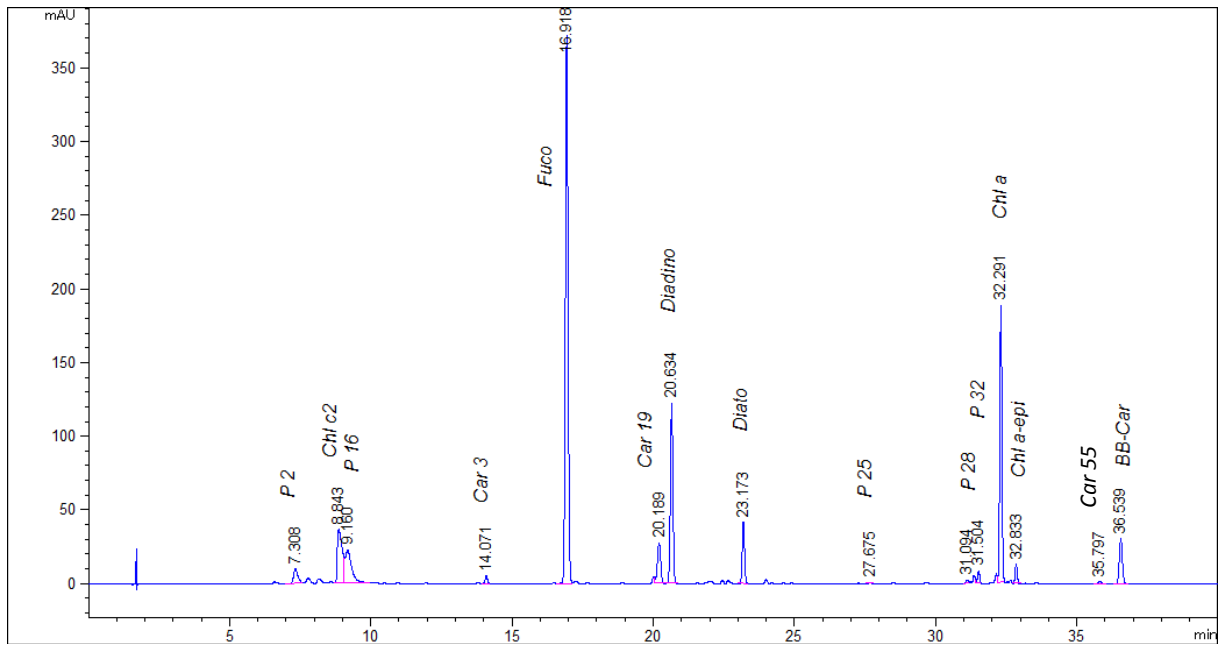

*Chaetoceros sp. tenuissimus* like

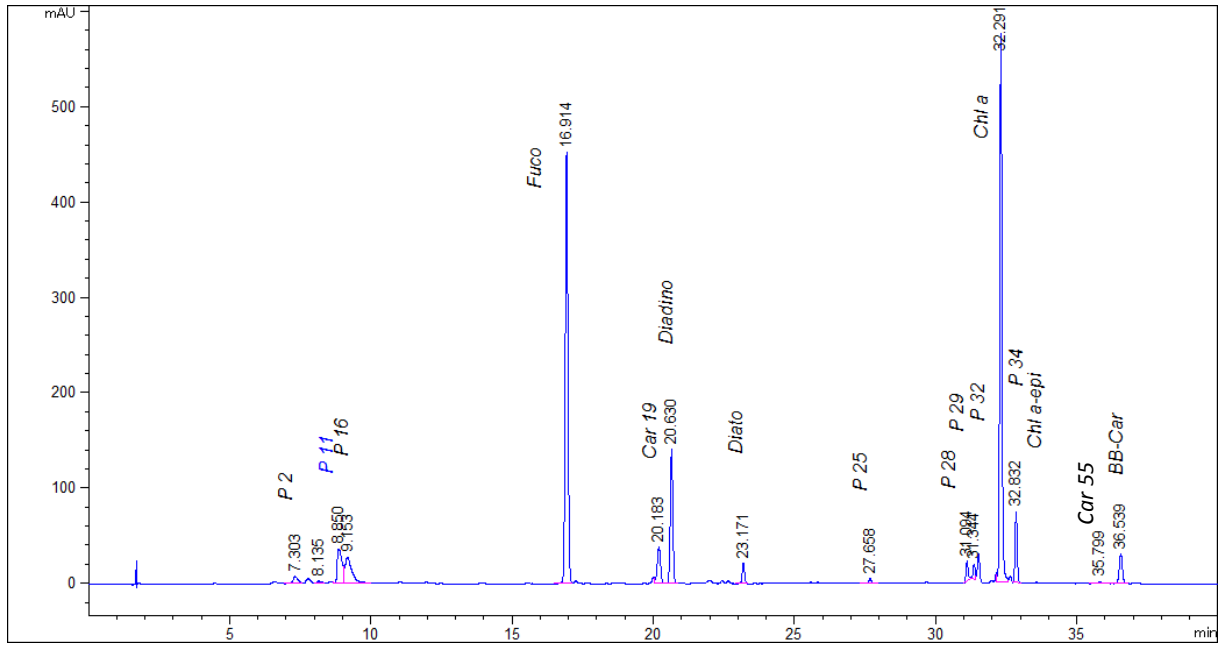

*Chaetoceros calcitrans f. pumillum* CCAP 1010/11

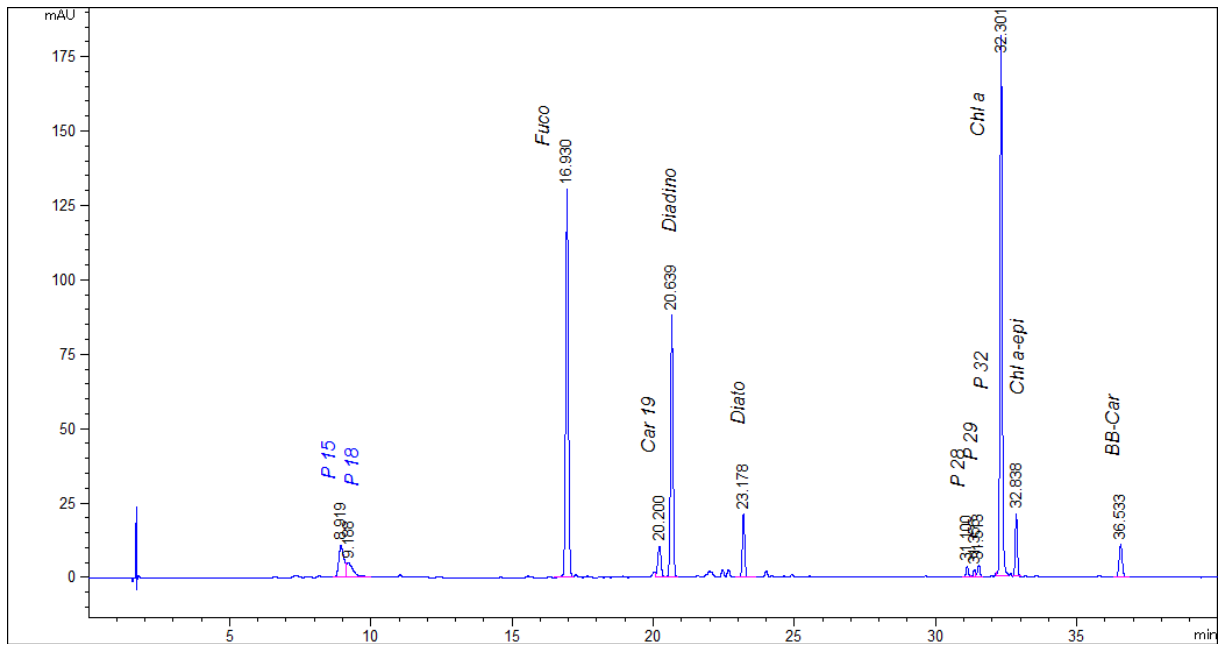

*Chaetoceros calcitrans* CCMP 1315

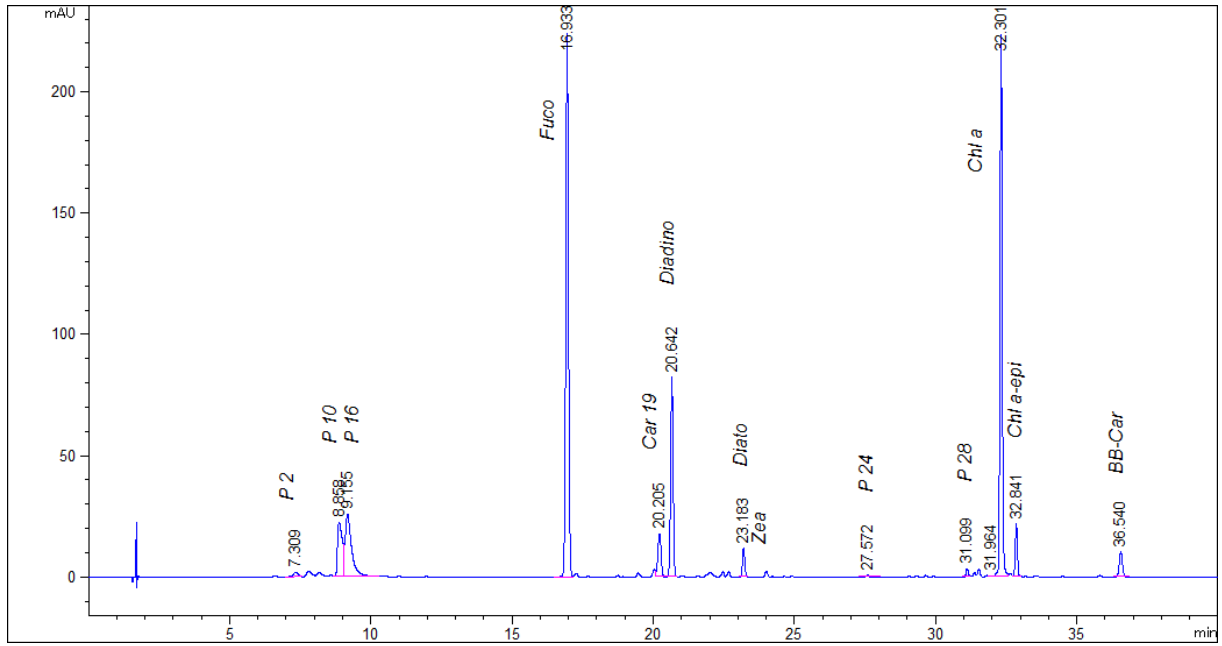

*Chaetoceros gracilis* UTEX LB 2658

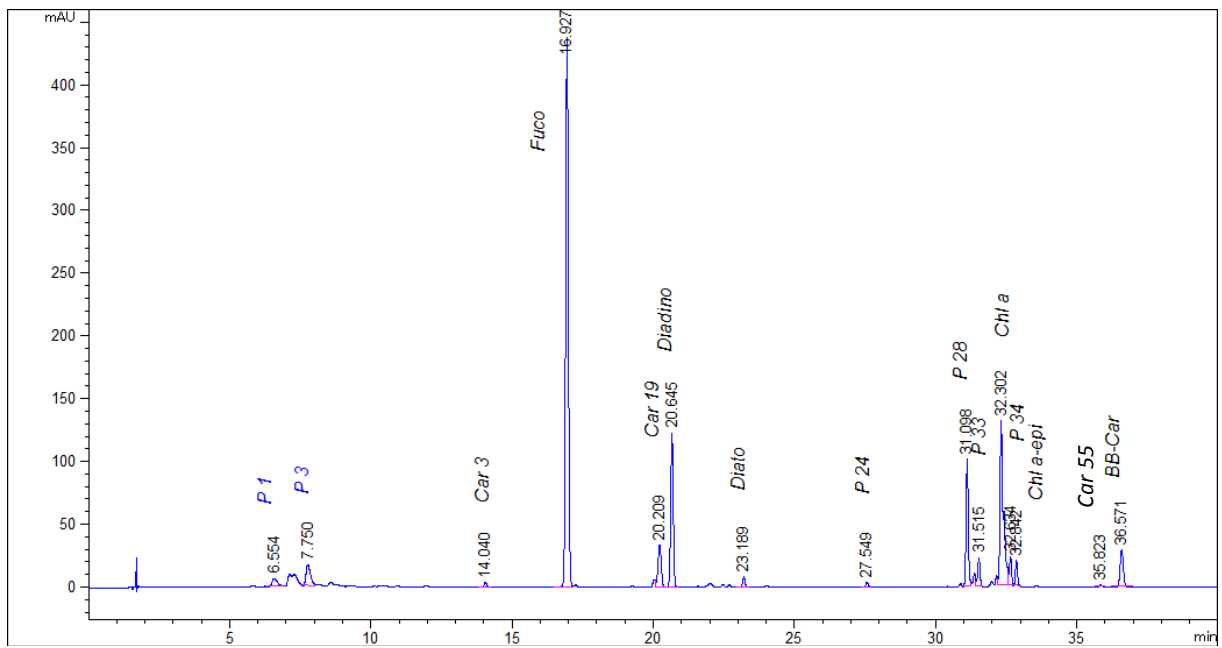

*Nitzschia* sp. CCMP 2526

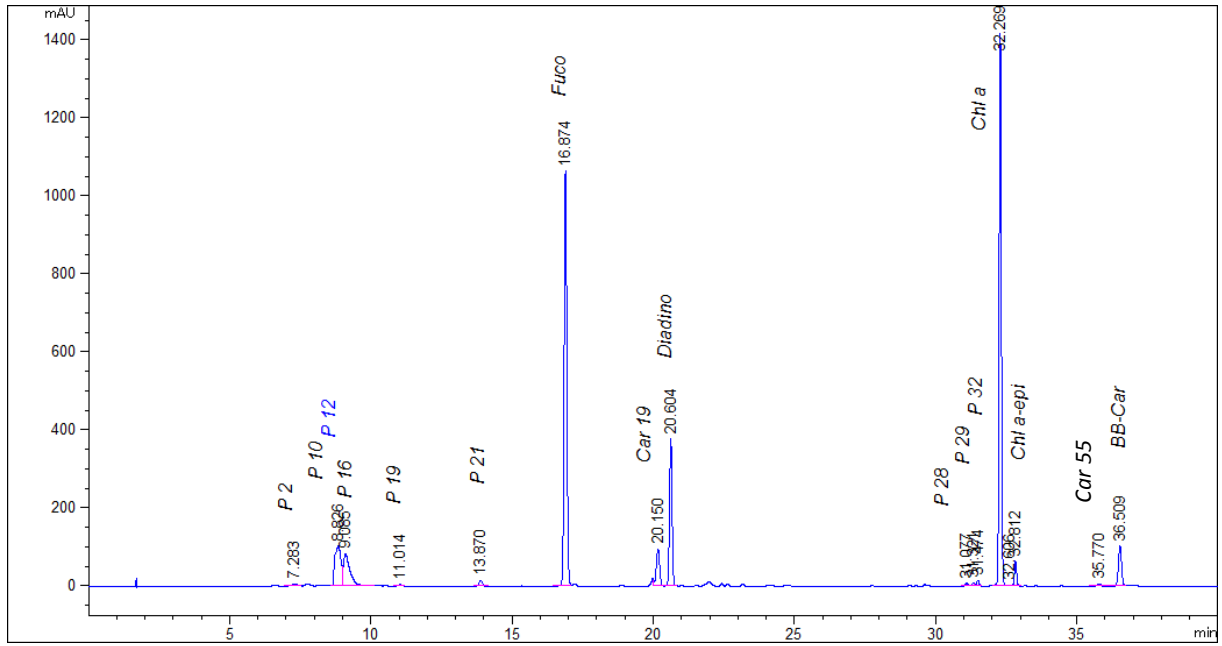

*Phaeodactylum tricornutum* CCMP 632

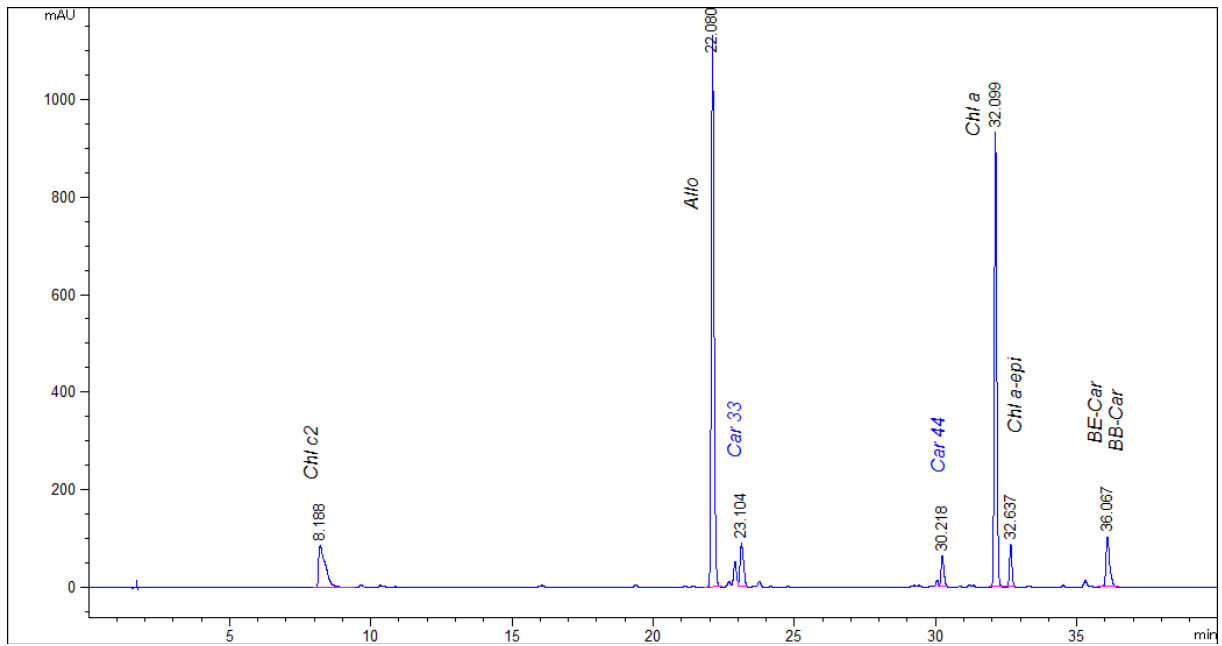

*Rhodomonas salina* CCAP 978/27



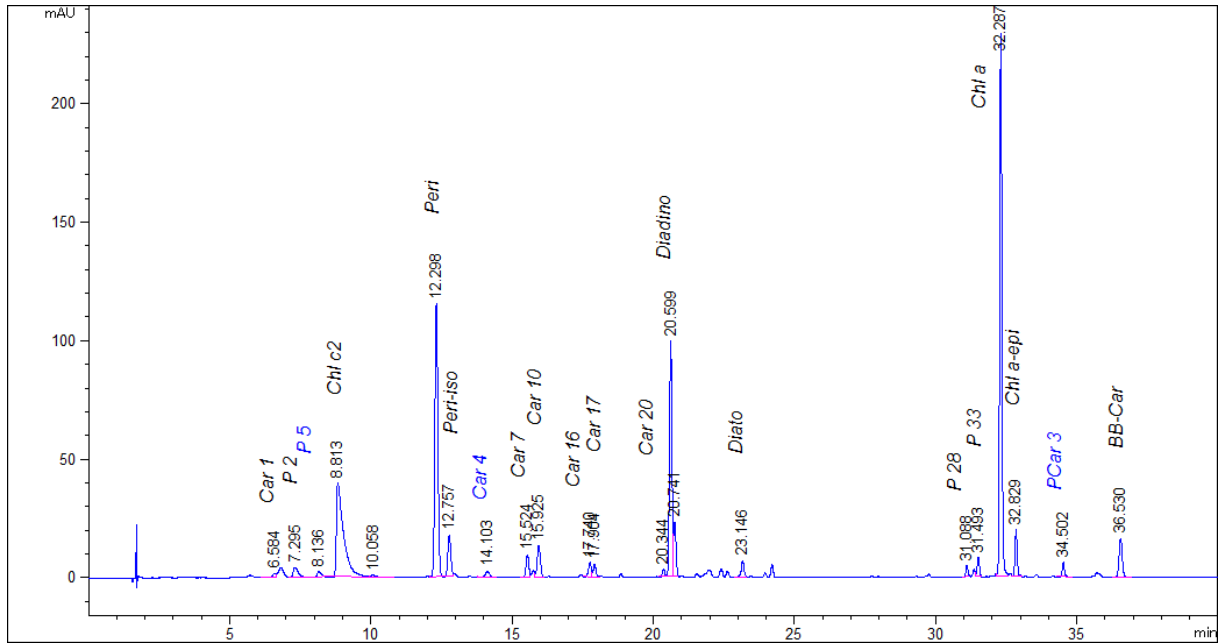

*Alexandrium tamarensis* MOG 835 (toxic)

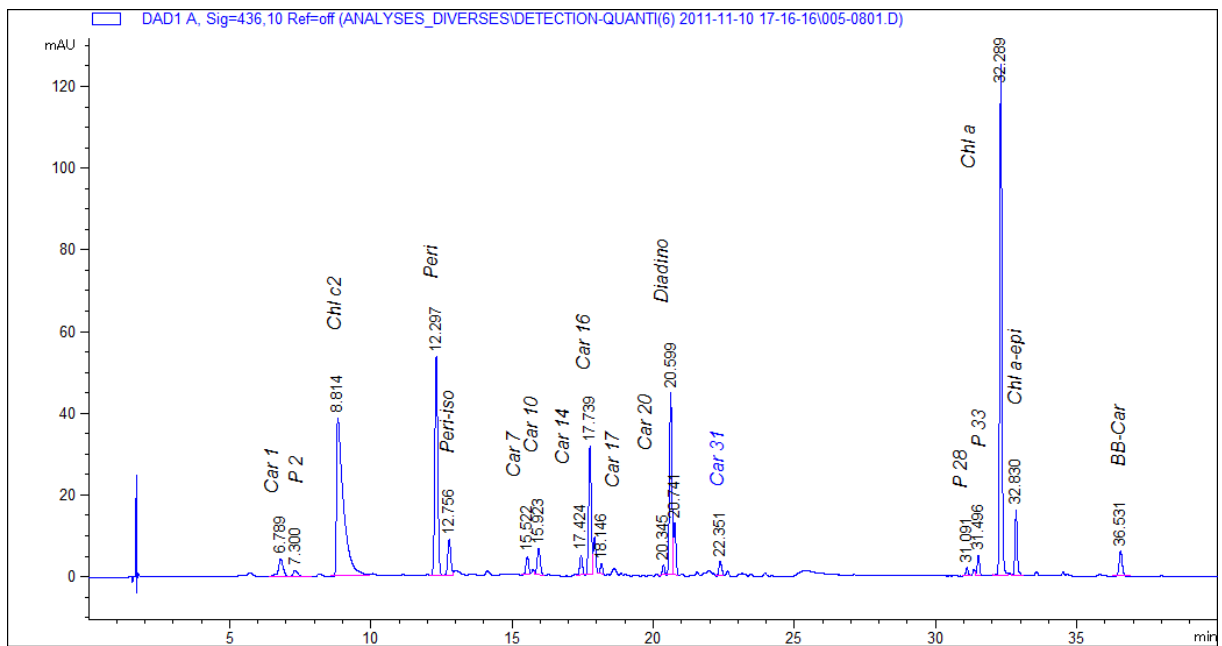

*Alexandrium tamarensis* PLY 497A (non toxic)

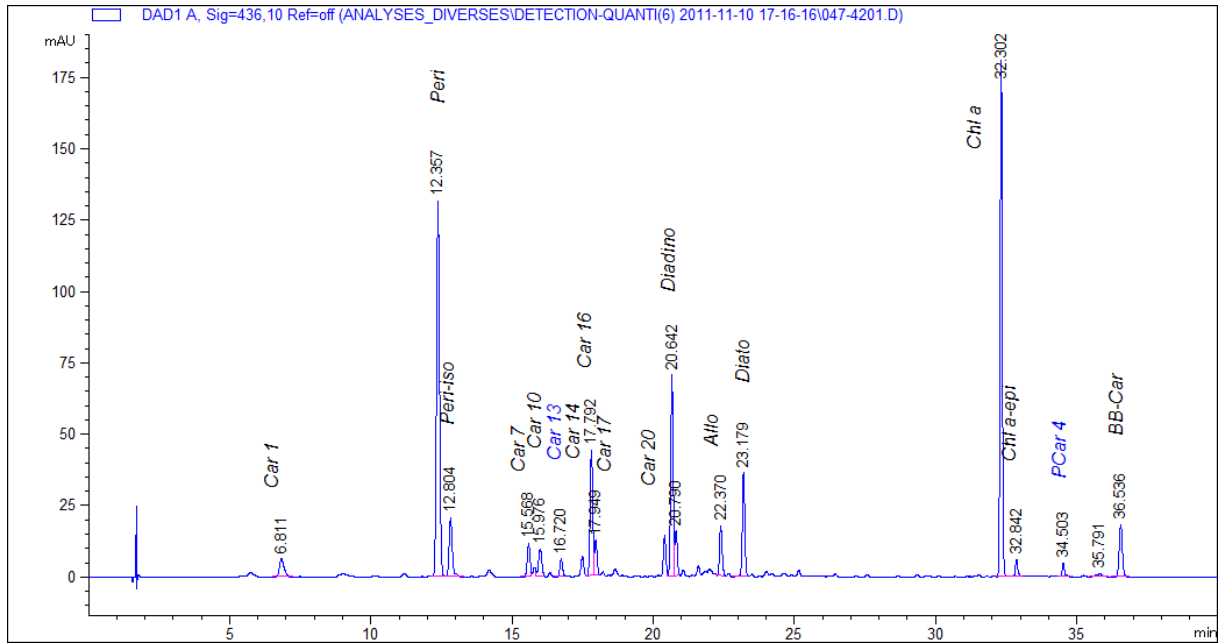

***Alexandrium minutum* CM 1002 (non toxic)**

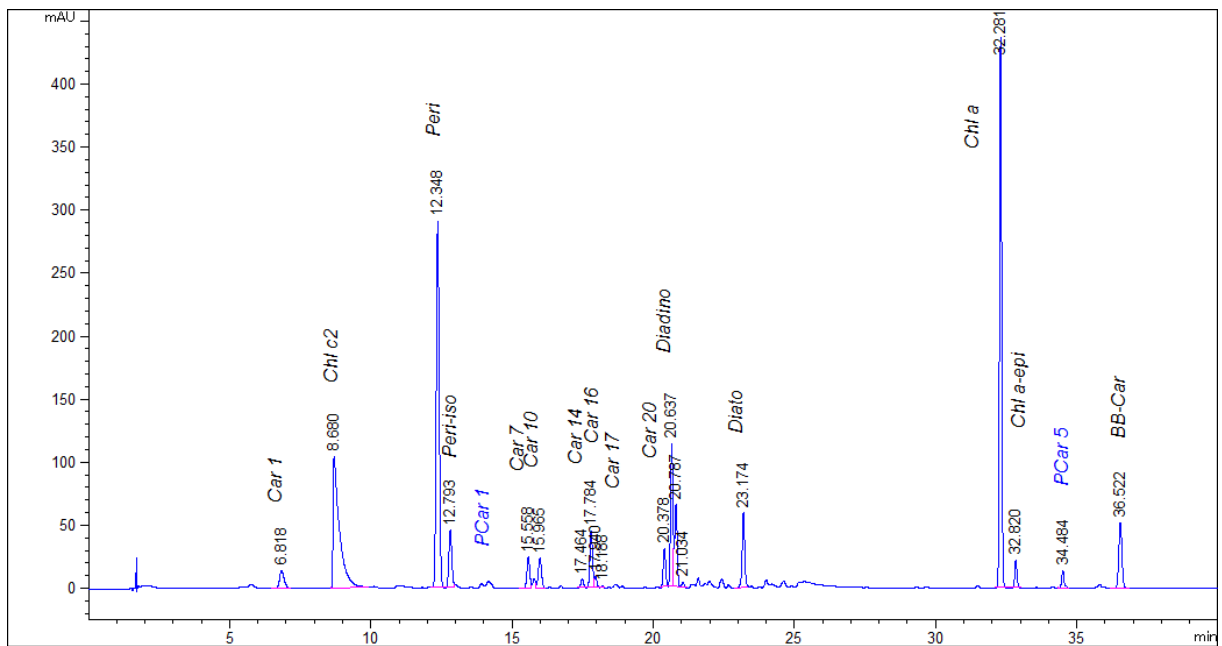

***Alexandrium minutum* AM89BM (Toxic)**

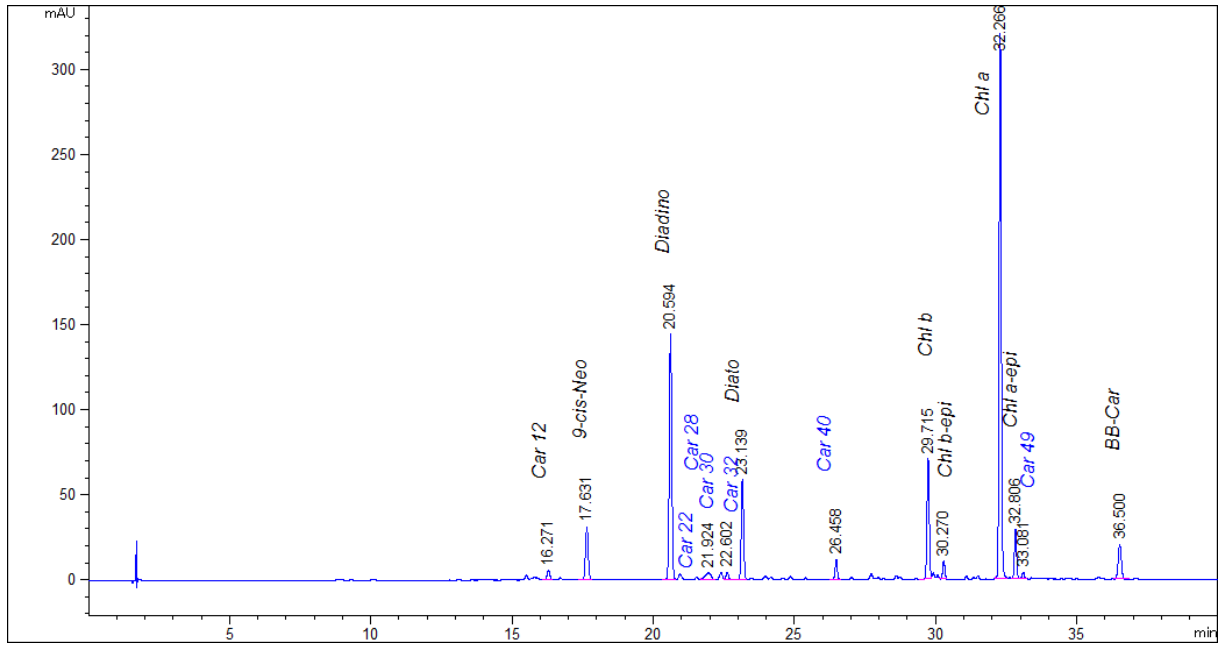

*Euglena proxima* SAG 1224-11a
