# Supplementary material for: Community analysis of pigment patterns from 37 microalgae strains reveals new carotenoids and porphyrins characteristic of distinct strains and taxonomic groups
Source: PubMed Central journal article supplement (PMC5322898; doi:10.1371/journal.pone.0171872), 2017-02-23
Supplement: pone.0171872.s004.pdf [file pone.0171872.s004.pdf]

## Supporting Information

**S2 Table. Pigments and derivatives currently used as chemotaxonomic markers of phytoplankton strains, species and classes.**

| Algal lineage or pigment type       | Ancillary pigments markers described (minor or variable occurrence)                                                    | Reference |
|-------------------------------------|------------------------------------------------------------------------------------------------------------------------|-----------|
| Bolidophyceae                       | Chl $c_3$ -like pigment                                                                                                | (1)       |
| <i>Chatonnella cf. verrucosa</i>    | Moraxanthin                                                                                                            | (2)       |
| CHLORO-1                            | Astaxanthin; Monadoxanthin (unusual rare occurrence)                                                                   | (3)       |
| CHRYSO-1                            | Antheraxanthin                                                                                                         | (4)       |
| CRYPTO-1                            | Crocoxanthin; Monadoxanthin; $\alpha$ -carotene                                                                        | (5)       |
| Dinoflagellates Chloroplaste type-1 | P-457; Peridinin; Peridinol; Dincoxanthin                                                                              | (6)       |
| Dinoflagellates Chloroplaste type-2 | Keto-19'-hex-fuco-like ; Gyroxanthin diester; Keto-19'-but-fuco-like; 4-keto-19'-but-fuco; $\beta, \epsilon$ -carotene | (6)       |
| Dinoflagellates Chloroplaste type-3 | Gyroxanthin diester; $\beta, \psi$ -carotene                                                                           | (6)       |
| Dinoflagellates Chloroplaste type-4 | $\gamma$ -carotene; Canthaxanthin (significant but not always present)                                                 | (6)       |
| Dinoflagellates Chloroplaste type-5 | Alloxanthin ; $\beta, \epsilon$ -carotene                                                                              | (6)       |
| Dinoflagellates Chloroplaste type 6 | <i>trans</i> -neoxanthin; Unidentified Carotenoid Lc                                                                   | (6)       |
| EUGLENO-1                           | Eutreptiellanone                                                                                                       | (7)       |
| EUSTIG-1                            | Antheraxanthin; Canthaxanthin (significant but not always present); Vauchieraxanthin and esters                        | (8)       |
| Haptophyte pigment type-5           | 4-k-fucoanthin                                                                                                         | (9)       |
| Haptophyte pigment type-7           | Chl $c_2$ -MGDG [14/14] (significant but not always present)                                                           | (9)       |
| MESOSTIG-1                          | Lycopene; <i>trans</i> -neoxanthin                                                                                     | (10)      |
| Mesostigmatophyceae Streptophyta    | Siphonaxanthin and esters                                                                                              | (11)      |
| PELAGO-1                            | $\epsilon, \epsilon$ -carotene                                                                                         | (12)      |
| Pelagophytes                        | Gyroxanthin diester                                                                                                    | (12)      |
| PRASINO-3B                          | Dihydrolutein; Micromonal; Micromonol; Unidentified Car- <i>M. pusilla</i> ; Uriolide                                  | (13)      |
| Silicoflagellates                   | Chl <i>a</i> like                                                                                                      | (14)      |
| TREBOUXIO-1                         | Astaxanthin                                                                                                            | (4)       |
| XANTHO-1                            | Heteroxanthin                                                                                                          | (15)      |

## References

1. Guillou L, Chrétiennot-Dinet M-J, Medlin LK, Claustre H, Goër SL, Vaultot D. *Bolidomonas*: A New Genus with Two Species Belonging to a New Algal Class, the Bolidophyceae (heterokonta). *Journal of Phycology*. 1999 avril;35(2):368–81.
2. Mangoni O, Imperatore C, Tomas CR, Costantino V, Saggiomo V, Mangoni A. The New Carotenoid Pigment Moraxanthin Is Associated with Toxic Microalgae. *Marine Drugs*. 2011 Feb 10;9(2):242–55.
3. Lewin RA, Krienitz L, Goericke R, Takeda H, Hepperle D. *Picocystis salinarum* gen. et sp. nov. (Chlorophyta) – a new picoplanktonic green alga. *Phycologia*. 2000 Nov 1;39(6):560–5.
4. Jeffrey SW, Wright SW, Zapata M. Microalgal class and their signature pigments. In: *Phytoplankton pigments: Characterization, chemotaxonomy and applications in oceanography*. Cambridge University Press; 2011. p. 3–77. (Environmental chemistry).
5. Rial P, Garrido JL, Jaén D, Rodríguez F. Pigment composition in three *Dinophysis* species (Dinophyceae) and the associated cultures of *Mesodinium rubrum* and *Teleaulax amphioxieia*. *J Plankton Res*. 2013 Mar 1;35(2):433–7.
6. Zapata M, Fraga S, Rodríguez F, Garrido JL. Pigment-based chloroplast types in dinoflagellates. *Mar Ecol Prog Ser*. 2012 Sep 28;465:33–52.
7. Bjørnland T. Chlorophylls and carotenoids of the marine alga *Eutreptiella gymnastica*. *Phytochemistry*. 1982;21(7):1715–9.
8. Brown JS. Functional Organization of Chlorophyll a and Carotenoids in the Alga, *Nannochloropsis salina*. *Plant Physiol*. 1987 Feb 1;83(2):434–7.
9. Zapata M, Jeffrey S, Wright S, Rodríguez F, Garrido J, Clementson L. Photosynthetic pigments in 37 species (65 strains) of Haptophyta: implications for oceanography and chemotaxonomy. *Marine Ecology Progress Series*. 2004;270:83–102.
10. Yoshii Y, Takaichi S, Maoka T, Inouye I. Photosynthetic Pigment Composition in the Primitive Green Alga *Mesostigma Viride* (prasinophyceae): Phylogenetic and Evolutionary Implications1. *Journal of Phycology*. 2003 juin;39(3):570–6.
11. Yoshii Y, Takaichi S, Maoka T, Suda S, Sekiguchi H, Nakayama T, et al. Variation of Siphonaxanthin Series Among the Genus *Nephroselmis* (prasinophyceae, Chlorophyta), Including a Novel Primary Methoxy Carotenoid1. *Journal of Phycology*. 2005 août;41(4):827–34.
12. Bjørnland T, Haxo FT, Liaaen-Jensen S. Carotenoids of the Florida red tide dinoflagellate *Karenia brevis*. *Biochemical Systematics and Ecology*. 2003 Oct;31(10):1147–62.
13. Brown MR, Jeffrey SW. Biochemical composition of microalgae from the green algal classes Chlorophyceae and Prasinophyceae. 1. Amino acids, sugars and pigments. *Journal of Experimental Marine Biology and Ecology*. 1992 Oct 12;161(1):91–113.
14. Edvardsen B, Eikrem W, Shalchian-Tabrizi K, Riisberg I, Johnsen G, Naustvoll L, et al. *Verrucophora farcimen* gen. et sp. nov. (Dictyochophyceae, Heterokonta)—a bloom-forming ichthyotoxic flagellate from the Skagerrak, Norway1. *Journal of Phycology*. 2007 Oct 1;43(5):1054–70.
15. Andersen RA, Potter D, Bidigare RR, Latasa M, Rowan K, O’Kelly CJ. Characterization and Phylogenetic position of the enigmatic golden alga *Phaeothamnion confervicola*: Ultrastructure, pigment composition and partial SSu rDNA sequence. *Journal of Phycology*. 1998 avril;34(2):286–98.
